# Supplementary material for: Multiple “Hot exciton” channel molecular design in organic electroluminescence materials: a theoretical investigation
Source: Royal Society of Chemistry journal article supplement (doi:10.1039/d0ma00927j), 2021-01-01
Supplement: d0ma00927j1.pdf [file d0ma00927j1.pdf]

Supporting Information

## Multiple “Hot exciton” channels molecular design in organic electroluminescence materials: a theoretical investigation

*Yuyu Pan*,<sup>\*,a,c</sup> *Yao Guo*,<sup>a</sup> *Mei Zhao*,<sup>a</sup> *Chang Li*,<sup>a</sup> and *Bing Yang*<sup>\*,b</sup>

<sup>a</sup>School of Petrochemical Engineering, Shenyang University of Technology, 30 Guanghua Street, Liaoyang, 111003, P. R. China;

<sup>b</sup>State Key Laboratory of Supramolecular Structure and Materials, Jilin University, Changchun, 130012, P. R. China.

<sup>c</sup>State Key Laboratory of Luminescent Materials and Devices, South China University of Technology, Guangzhou 510640, China

Tel: +86 15140996671;

E-mail: [pyy39518768@163.com](mailto:pyy39518768@163.com), [yangbing@jlu.edu.cn](mailto:yangbing@jlu.edu.cn)

### Contents

**SI:** Ground state optimized configuration for the  $X_1$ -NZ-D<sub>1-10</sub> and  $X_2$ -NZ-D<sub>1-10</sub>.

**S II:** NTOs of Singlet states  $S_1$ - $S_{10}$  and Triplet states  $T_1$ - $T_{10}$  for the  $X_1$ -NZ-D<sub>1-10</sub> and  $X_2$ -NZ-D<sub>1-10</sub>.

**S III:** The electron transfer ratio among fragments.

**S IV:** The excitation energy ( $E_S$ ,  $E_T$ ) and transition dipole moments ( $\lambda$ ) of the  $S_1$ - $S_{10}$  and  $T_1$ - $T_{10}$  of the  $X_1$ -NZ-D<sub>1-10</sub> and  $X_2$ -NZ-D<sub>1-10</sub>

**S V:** The SOC between the excited states of the  $X_1$ -NZ-D<sub>1-10</sub> and  $X_2$ -NZ-D<sub>1-10</sub>

**SI:** Ground state optimized configuration for the  $X_1$ -NZ- $D_{1-10}$  and  $X_2$ -NZ- $D_{1-10}$ .

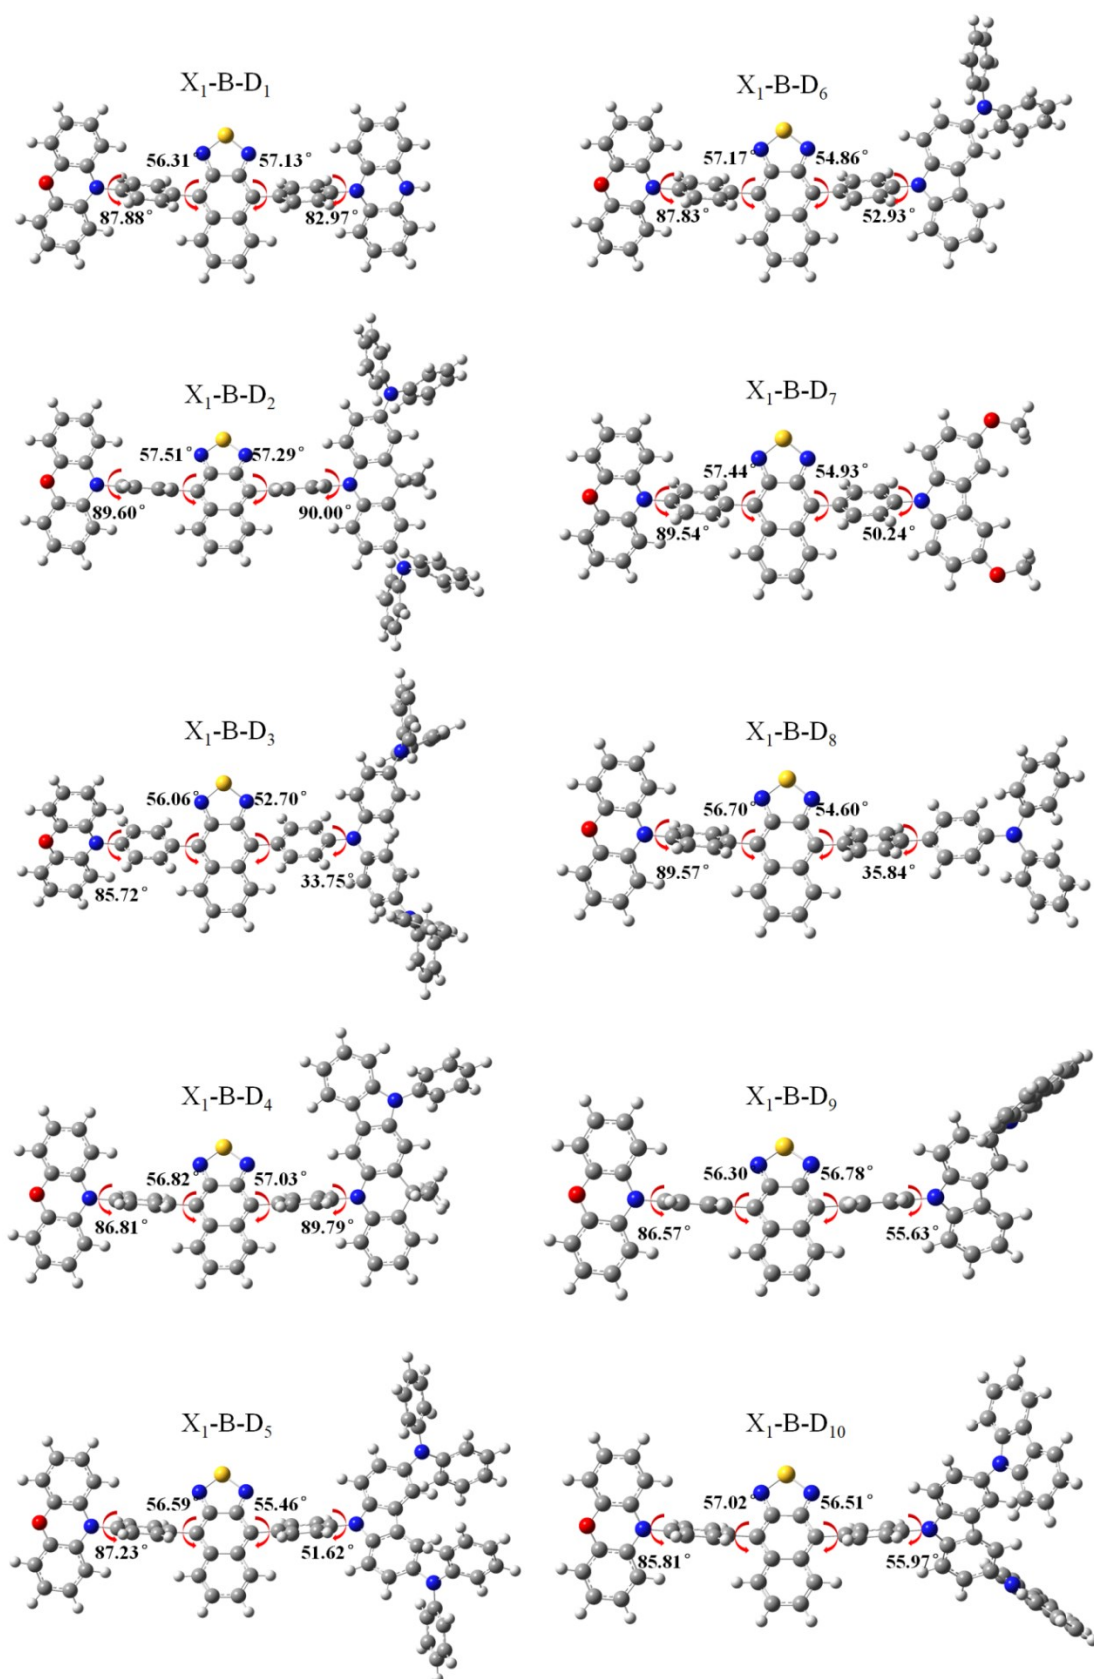

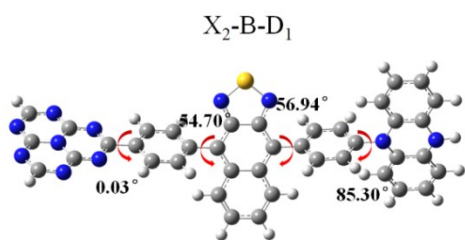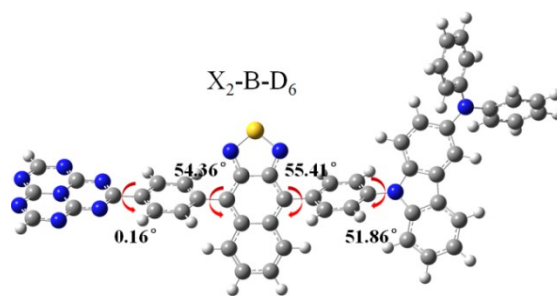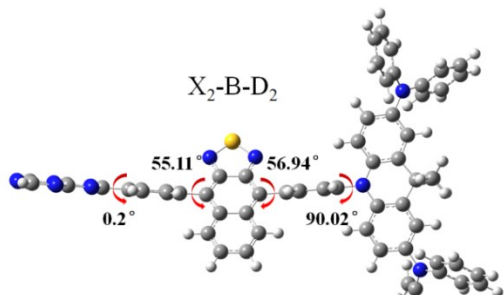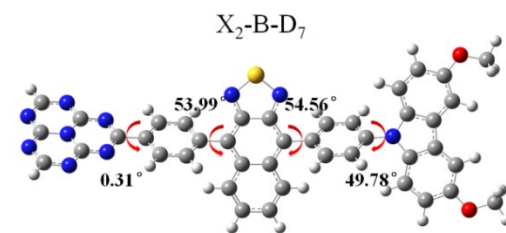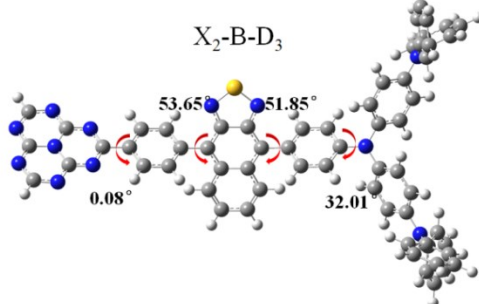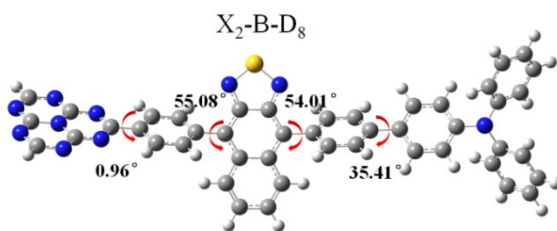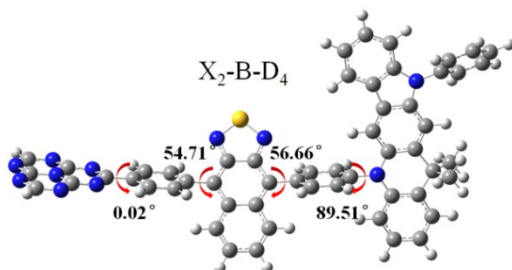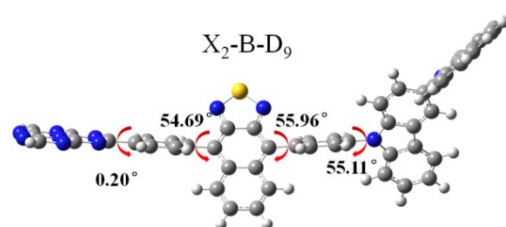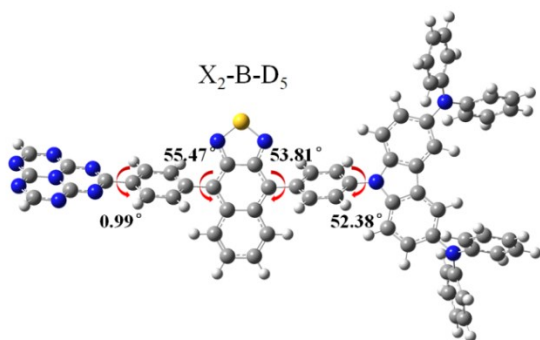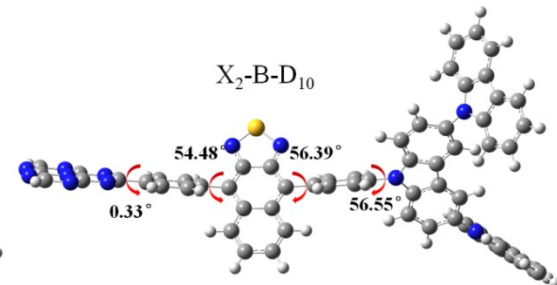

**S II** : NTOs of Singlet states  $S_1$ - $S_{10}$  and Triplet states  $T_1$ - $T_{10}$  for  $X_1$ -NZ- $D_{1-10}$  and  $X_2$ -NZ- $D_{1-10}$ .

| $(X_1$ - $B$ - $D_1)$    | Hole | Particle | Hole                     | Particle |
|--------------------------|------|----------|--------------------------|----------|
| $S_0 \rightarrow S_1$    |      | 99.0%    | $S_0 \rightarrow T_1$    | 3.4%     |
| $S_0 \rightarrow S_2$    |      | 2.14%    | $S_0 \rightarrow T_2$    | 99.0%    |
| $S_0 \rightarrow S_3$    |      | 85.8%    | $S_0 \rightarrow T_3$    | 98.9%    |
| $S_0 \rightarrow S_4$    |      | 16.7%    | $S_0 \rightarrow T_4$    | 0.80%    |
| $S_0 \rightarrow S_5$    |      | 80.5%    | $S_0 \rightarrow T_5$    | 2.1%     |
| $S_0 \rightarrow S_6$    |      | 32.2%    | $S_0 \rightarrow T_6$    | 0.4%     |
| $S_0 \rightarrow S_7$    |      | 66.3%    | $S_0 \rightarrow T_7$    | 0.7%     |
| $S_0 \rightarrow S_8$    |      | 1.80%    | $S_0 \rightarrow T_8$    | 8.0%     |
| $S_0 \rightarrow S_9$    |      | 87.7%    | $S_0 \rightarrow T_9$    | 1.2%     |
| $S_0 \rightarrow S_{10}$ |      | 58.0%    | $S_0 \rightarrow T_{10}$ | 17.8%    |

The percentage on the arrow is the electron transfer ratio among fragments.

| (X <sub>1</sub> -B-D <sub>2</sub> ) | Hole | Particle | Hole                            | Particle |
|-------------------------------------|------|----------|---------------------------------|----------|
| S <sub>0</sub> →S <sub>1</sub>      |      | 98.7%    | S <sub>0</sub> →T <sub>1</sub>  | 3.2%     |
| S <sub>0</sub> →S <sub>2</sub>      |      | 25.2%    | S <sub>0</sub> →T <sub>2</sub>  | 98.7%    |
| S <sub>0</sub> →S <sub>3</sub>      |      | 96.3%    | S <sub>0</sub> →T <sub>3</sub>  | 99.0%    |
| S <sub>0</sub> →S <sub>4</sub>      |      | 99.2%    | S <sub>0</sub> →T <sub>4</sub>  | 1.8%     |
| S <sub>0</sub> →S <sub>5</sub>      |      | 956.2%   | S <sub>0</sub> →T <sub>5</sub>  | 99.3%    |
| S <sub>0</sub> →S <sub>6</sub>      |      | 7.6%     | S <sub>0</sub> →T <sub>6</sub>  | 0.5%     |
| S <sub>0</sub> →S <sub>7</sub>      |      | 52.3%    | S <sub>0</sub> →T <sub>7</sub>  | 0.3%     |
| S <sub>0</sub> →S <sub>8</sub>      |      | 46.6%    | S <sub>0</sub> →T <sub>8</sub>  | 0.3%     |
| S <sub>0</sub> →S <sub>9</sub>      |      | 1.5%     | S <sub>0</sub> →T <sub>9</sub>  | 0.6%     |
| S <sub>0</sub> →S <sub>10</sub>     |      | 94.8%    | S <sub>0</sub> →T <sub>10</sub> | 0.2%     |

The percentage on the arrow is the electron transfer ratio among fragments.

| (X <sub>1</sub> -B-D <sub>3</sub> ) | Hole | Particle | Hole                            | Particle |
|-------------------------------------|------|----------|---------------------------------|----------|
| S <sub>0</sub> →S <sub>1</sub>      |      | 48.6%    | S <sub>0</sub> →T <sub>1</sub>  | 6.4%     |
| S <sub>0</sub> →S <sub>2</sub>      |      | 98.6%    | S <sub>0</sub> →T <sub>2</sub>  | 84.4%    |
| S <sub>0</sub> →S <sub>3</sub>      |      | 51.4%    | S <sub>0</sub> →T <sub>3</sub>  | 98.8%    |
| S <sub>0</sub> →S <sub>4</sub>      |      | 97.7%    | S <sub>0</sub> →T <sub>4</sub>  | 3.3%     |
| S <sub>0</sub> →S <sub>5</sub>      |      | 84.4%    | S <sub>0</sub> →T <sub>5</sub>  | 0.7%     |
| S <sub>0</sub> →S <sub>6</sub>      |      | 8.0%     | S <sub>0</sub> →T <sub>6</sub>  | 5.1%     |
| S <sub>0</sub> →S <sub>7</sub>      |      | 8.4%     | S <sub>0</sub> →T <sub>7</sub>  | 4.3%     |
| S <sub>0</sub> →S <sub>8</sub>      |      | 16.0%    | S <sub>0</sub> →T <sub>8</sub>  | 16.0%    |
| S <sub>0</sub> →S <sub>9</sub>      |      | 81.1%    | S <sub>0</sub> →T <sub>9</sub>  | 88.0%    |
| S <sub>0</sub> →S <sub>10</sub>     |      | 27.6%    | S <sub>0</sub> →T <sub>10</sub> | 55.9%    |

The percentage on the arrow is the electron transfer ratio among fragments.

| (X <sub>1</sub> -B-D <sub>4</sub> ) | Hole | Particle | Hole                            | Particle |
|-------------------------------------|------|----------|---------------------------------|----------|
| S <sub>0</sub> →S <sub>1</sub>      |      | 33.8%    | S <sub>0</sub> →T <sub>1</sub>  | 3.4%     |
| S <sub>0</sub> →S <sub>2</sub>      |      | 98.4%    | S <sub>0</sub> →T <sub>2</sub>  | 89.7%    |
| S <sub>0</sub> →S <sub>3</sub>      |      | 98.9%    | S <sub>0</sub> →T <sub>3</sub>  | 89.8%    |
| S <sub>0</sub> →S <sub>4</sub>      |      | 98.6%    | S <sub>0</sub> →T <sub>4</sub>  | 2.1%     |
| S <sub>0</sub> →S <sub>5</sub>      |      | 2.9%     | S <sub>0</sub> →T <sub>5</sub>  | 0.1%     |
| S <sub>0</sub> →S <sub>6</sub>      |      | 7.5%     | S <sub>0</sub> →T <sub>6</sub>  | 0.4%     |
| S <sub>0</sub> →S <sub>7</sub>      |      | 91.5%    | S <sub>0</sub> →T <sub>7</sub>  | 0.4%     |
| S <sub>0</sub> →S <sub>8</sub>      |      | 94.9%    | S <sub>0</sub> →T <sub>8</sub>  | 0.6%     |
| S <sub>0</sub> →S <sub>9</sub>      |      | 1.5%     | S <sub>0</sub> →T <sub>9</sub>  | 90.0%    |
| S <sub>0</sub> →S <sub>10</sub>     |      | 89.7%    | S <sub>0</sub> →T <sub>10</sub> | 34.4%    |

The percentage on the arrow is the electron transfer ratio among fragments.

| (X <sub>1</sub> -B-D <sub>5</sub> ) | Hole | Particle | Hole                            | Particle |
|-------------------------------------|------|----------|---------------------------------|----------|
| S <sub>0</sub> →S <sub>1</sub>      |      | 37.1%    | S <sub>0</sub> →T <sub>1</sub>  | 3.9%     |
| S <sub>0</sub> →S <sub>2</sub>      |      | 97.8%    | S <sub>0</sub> →T <sub>2</sub>  | 98.9%    |
| S <sub>0</sub> →S <sub>3</sub>      |      | 70.6%    | S <sub>0</sub> →T <sub>3</sub>  | 96.7%    |
| S <sub>0</sub> →S <sub>4</sub>      |      | 98.9%    | S <sub>0</sub> →T <sub>4</sub>  | 2.2%     |
| S <sub>0</sub> →S <sub>5</sub>      |      | 3.3%     | S <sub>0</sub> →T <sub>5</sub>  | 97.6%    |
| S <sub>0</sub> →S <sub>6</sub>      |      | 79.9%    | S <sub>0</sub> →T <sub>6</sub>  | 2.9%     |
| S <sub>0</sub> →S <sub>7</sub>      |      | 51.2%    | S <sub>0</sub> →T <sub>7</sub>  | 0.4%     |
| S <sub>0</sub> →S <sub>8</sub>      |      | 46.9%    | S <sub>0</sub> →T <sub>8</sub>  | 1.0%     |
| S <sub>0</sub> →S <sub>9</sub>      |      | 2.0%     | S <sub>0</sub> →T <sub>9</sub>  | 1.8%     |
| S <sub>0</sub> →S <sub>10</sub>     |      | 5%       | S <sub>0</sub> →T <sub>10</sub> | 0.5%     |

The percentage on the arrow is the electron transfer ratio among fragments.

| (X <sub>1</sub> -B-D <sub>6</sub> ) | Hole | Particle  | Hole                            | Particle  |
|-------------------------------------|------|-----------|---------------------------------|-----------|
| S <sub>0</sub> →S <sub>1</sub>      |      | 25.0%<br> | S <sub>0</sub> →T <sub>1</sub>  | 4.0%<br>  |
| S <sub>0</sub> →S <sub>2</sub>      |      | 99.3%<br> | S <sub>0</sub> →T <sub>2</sub>  | 99.0%<br> |
| S <sub>0</sub> →S <sub>3</sub>      |      | 85.1%<br> | S <sub>0</sub> →T <sub>3</sub>  | 96.6%<br> |
| S <sub>0</sub> →S <sub>4</sub>      |      | 90.9%<br> | S <sub>0</sub> →T <sub>4</sub>  | 2.5%<br>  |
| S <sub>0</sub> →S <sub>5</sub>      |      | 2.7%<br>  | S <sub>0</sub> →T <sub>5</sub>  | 0.6%<br>  |
| S <sub>0</sub> →S <sub>6</sub>      |      | 45.7%<br> | S <sub>0</sub> →T <sub>6</sub>  | 0.6%<br>  |
| S <sub>0</sub> →S <sub>7</sub>      |      | 53.3%<br> | S <sub>0</sub> →T <sub>7</sub>  | 2.7%<br>  |
| S <sub>0</sub> →S <sub>8</sub>      |      | 1.9%<br>  | S <sub>0</sub> →T <sub>8</sub>  | 68.5%<br> |
| S <sub>0</sub> →S <sub>9</sub>      |      | 86.9%<br> | S <sub>0</sub> →T <sub>9</sub>  | 1.5%<br>  |
| S <sub>0</sub> →S <sub>10</sub>     |      | 37.4%<br> | S <sub>0</sub> →T <sub>10</sub> | 0.1%<br>  |

The percentage on the arrow is the electron transfer ratio among fragments.

| (X <sub>1</sub> -B-D <sub>7</sub> ) | Hole | Particle  | Hole                            | Particle  |
|-------------------------------------|------|-----------|---------------------------------|-----------|
| S <sub>0</sub> →S <sub>1</sub>      |      | 23.2%<br> | S <sub>0</sub> →T <sub>1</sub>  | 4.1%<br>  |
| S <sub>0</sub> →S <sub>2</sub>      |      | 98.7%<br> | S <sub>0</sub> →T <sub>2</sub>  | 96.7%<br> |
| S <sub>0</sub> →S <sub>3</sub>      |      | 79.1%<br> | S <sub>0</sub> →T <sub>3</sub>  | 87.4%<br> |
| S <sub>0</sub> →S <sub>4</sub>      |      | 98.1%<br> | S <sub>0</sub> →T <sub>4</sub>  | 3.7%<br>  |
| S <sub>0</sub> →S <sub>5</sub>      |      | 23.6%<br> | S <sub>0</sub> →T <sub>5</sub>  | 0.3%<br>  |
| S <sub>0</sub> →S <sub>6</sub>      |      | 74.6%<br> | S <sub>0</sub> →T <sub>6</sub>  | 0.9%<br>  |
| S <sub>0</sub> →S <sub>7</sub>      |      | 1.7%<br>  | S <sub>0</sub> →T <sub>7</sub>  | 4.5%<br>  |
| S <sub>0</sub> →S <sub>8</sub>      |      | 6.2%<br>  | S <sub>0</sub> →T <sub>8</sub>  | 4.8%<br>  |
| S <sub>0</sub> →S <sub>9</sub>      |      | 26.9%<br> | S <sub>0</sub> →T <sub>9</sub>  | 69.9%<br> |
| S <sub>0</sub> →S <sub>10</sub>     |      | 41.6%<br> | S <sub>0</sub> →T <sub>10</sub> | 54.0%<br> |

The percentage on the arrow is the electron transfer ratio among fragments.

| (X <sub>1</sub> -B-D <sub>8</sub> ) | Hole | Particle | Hole                            | Particle |
|-------------------------------------|------|----------|---------------------------------|----------|
| S <sub>0</sub> →S <sub>1</sub>      |      | 17.6%    | S <sub>0</sub> →T <sub>1</sub>  | 4.6%     |
| S <sub>0</sub> →S <sub>2</sub>      |      | 99.0%    | S <sub>0</sub> →T <sub>2</sub>  | 99.0%    |
| S <sub>0</sub> →S <sub>3</sub>      |      | 84.7%    | S <sub>0</sub> →T <sub>3</sub>  | 19.6%    |
| S <sub>0</sub> →S <sub>4</sub>      |      | 8.5%     | S <sub>0</sub> →T <sub>4</sub>  | 34.2%    |
| S <sub>0</sub> →S <sub>5</sub>      |      | 89.4%    | S <sub>0</sub> →T <sub>5</sub>  | 0.3%     |
| S <sub>0</sub> →S <sub>6</sub>      |      | 2.3%     | S <sub>0</sub> →T <sub>6</sub>  | 1.1%     |
| S <sub>0</sub> →S <sub>7</sub>      |      | 13.5%    | S <sub>0</sub> →T <sub>7</sub>  | 38.3%    |
| S <sub>0</sub> →S <sub>8</sub>      |      | 42.6%    | S <sub>0</sub> →T <sub>8</sub>  | 1.1%     |
| S <sub>0</sub> →S <sub>9</sub>      |      | 68.5%    | S <sub>0</sub> →T <sub>9</sub>  | 27%      |
| S <sub>0</sub> →S <sub>10</sub>     |      | 39.6%    | S <sub>0</sub> →T <sub>10</sub> | 3.9%     |

The percentage on the arrow is the electron transfer ratio among fragments.

| (X <sub>1</sub> -B-D <sub>9</sub> ) | Hole | Particle | Hole                            | Particle |
|-------------------------------------|------|----------|---------------------------------|----------|
| S <sub>0</sub> →S <sub>1</sub>      |      | 41.0%    | S <sub>0</sub> →T <sub>1</sub>  | 3.7%     |
| S <sub>0</sub> →S <sub>2</sub>      |      | 68.5%    | S <sub>0</sub> →T <sub>2</sub>  | 99.1%    |
| S <sub>0</sub> →S <sub>3</sub>      |      | 93.7%    | S <sub>0</sub> →T <sub>3</sub>  | 2.3%     |
| S <sub>0</sub> →S <sub>4</sub>      |      | 93.7%    | S <sub>0</sub> →T <sub>4</sub>  | 0.3%     |
| S <sub>0</sub> →S <sub>5</sub>      |      | 75.4%    | S <sub>0</sub> →T <sub>5</sub>  | 90.3%    |
| S <sub>0</sub> →S <sub>6</sub>      |      | 23.4%    | S <sub>0</sub> →T <sub>6</sub>  | 1.9%     |
| S <sub>0</sub> →S <sub>7</sub>      |      | 99.4%    | S <sub>0</sub> →T <sub>7</sub>  | 3.4%     |
| S <sub>0</sub> →S <sub>8</sub>      |      | 1.5%     | S <sub>0</sub> →T <sub>8</sub>  | 9.6%     |
| S <sub>0</sub> →S <sub>9</sub>      |      | 40.3%    | S <sub>0</sub> →T <sub>9</sub>  | 54.0%    |
| S <sub>0</sub> →S <sub>10</sub>     |      | 69.5%    | S <sub>0</sub> →T <sub>10</sub> | 0.1%     |

The percentage on the arrow is the electron transfer ratio among fragments.



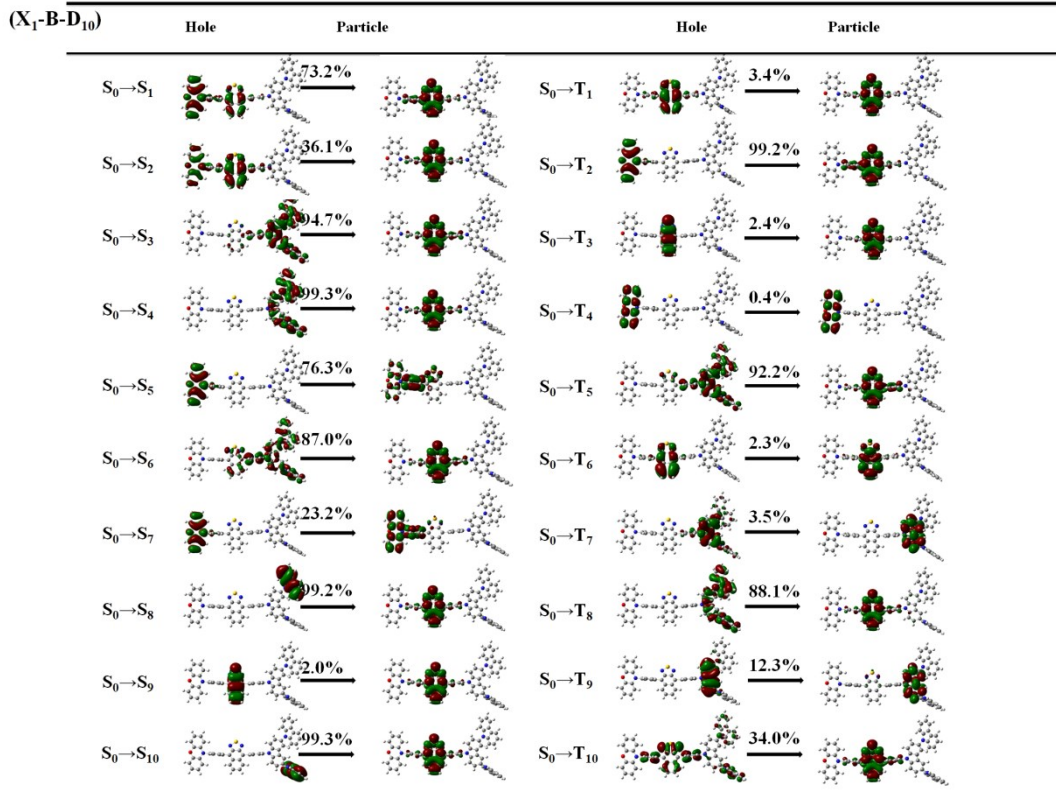

The percentage on the arrow is the electron transfer ratio among fragments.

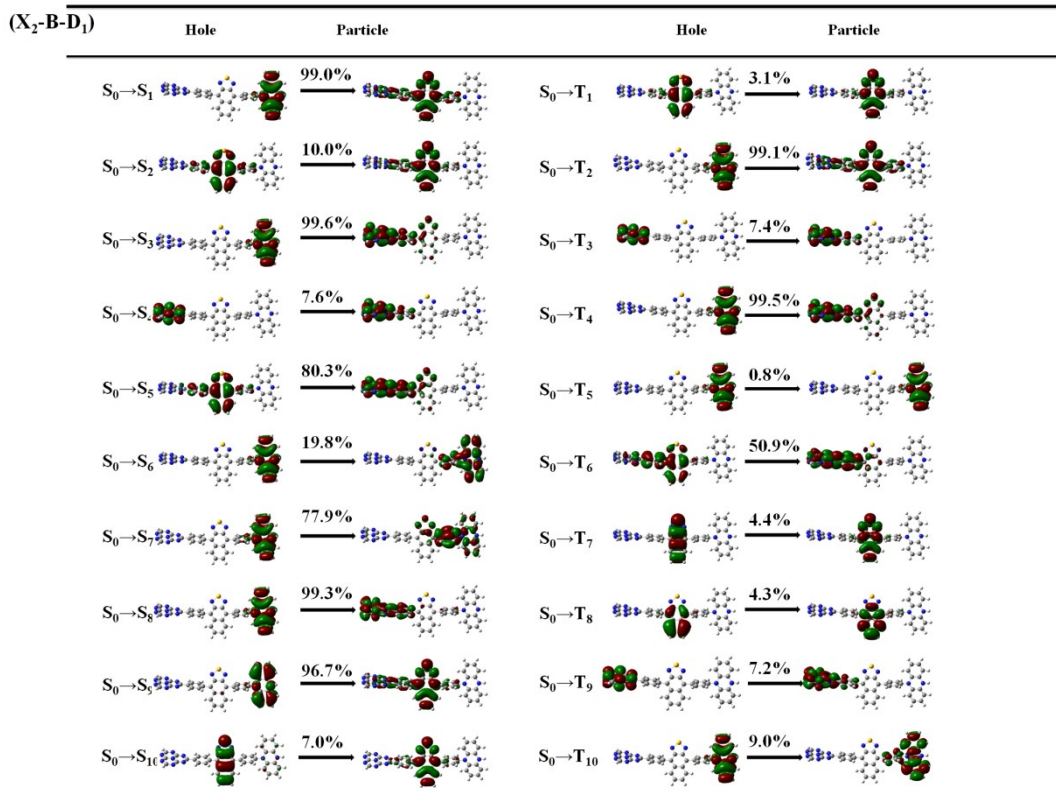

The percentage on the arrow is the electron transfer ratio among fragments.

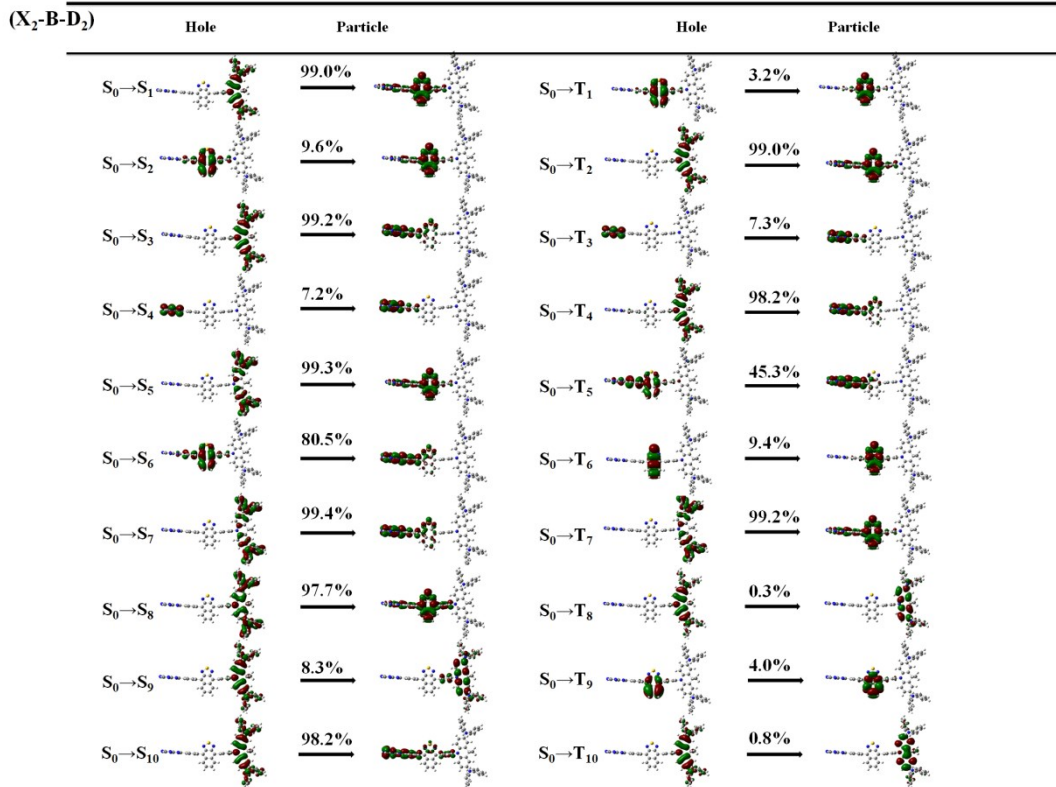

The percentage on the arrow is the electron transfer ratio among fragments.

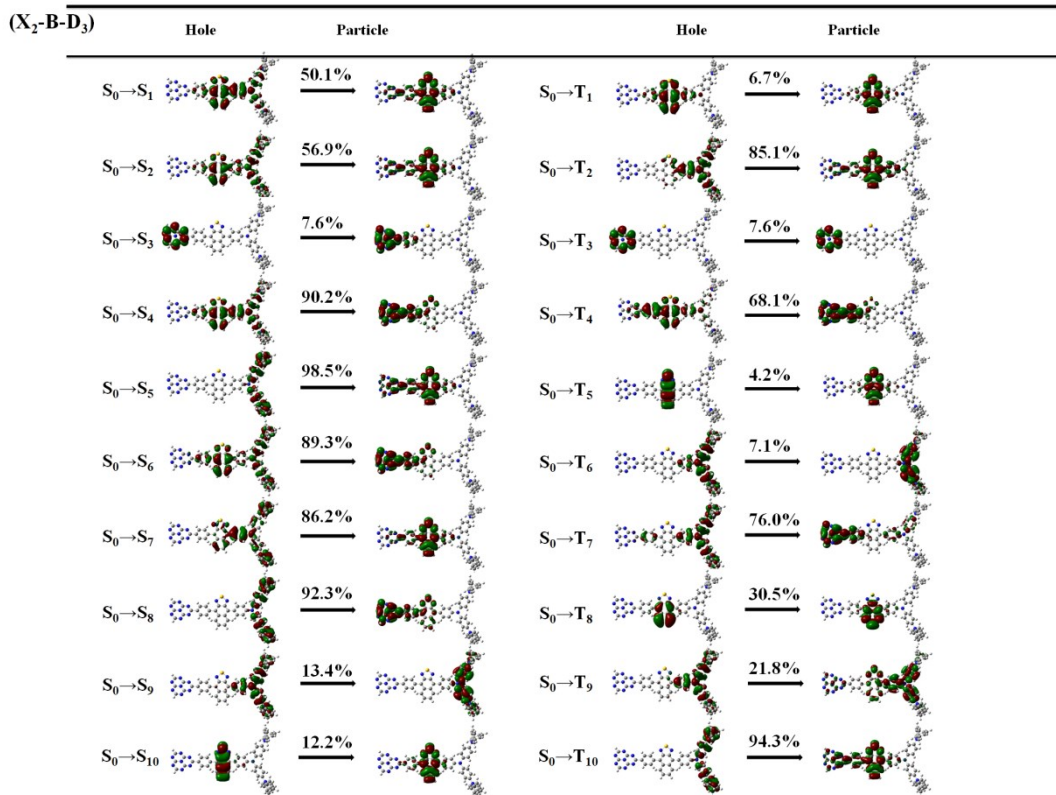

The percentage on the arrow is the electron transfer ratio among fragments.

| $(X_2-B-D_4)$            |                                                                                   | Hole  | Particle                                                                          | Hole                     | Particle |
|--------------------------|-----------------------------------------------------------------------------------|-------|-----------------------------------------------------------------------------------|--------------------------|----------|
| $S_0 \rightarrow S_1$    | 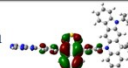 | 32.6% |  | $S_0 \rightarrow T_1$    | 16.8%    |
| $S_0 \rightarrow S_2$    |  | 99.0% |  | $S_0 \rightarrow T_2$    | 80.6%    |
| $S_0 \rightarrow S_3$    |  | 7.4%  |  | $S_0 \rightarrow T_3$    | 0.3%     |
| $S_0 \rightarrow S_4$    |  | 99.1% |  | $S_0 \rightarrow T_4$    | 30.0%    |
| $S_0 \rightarrow S_5$    |  | 80.2% |  | $S_0 \rightarrow T_5$    | 16.7%    |
| $S_0 \rightarrow S_6$    |  | 98.8% |  | $S_0 \rightarrow T_6$    | 8.2%     |
| $S_0 \rightarrow S_7$    |  | 3.3%  |  | $S_0 \rightarrow T_7$    | 38.9%    |
| $S_0 \rightarrow S_8$    |  | 96.0% |  | $S_0 \rightarrow T_8$    | 18.3%    |
| $S_0 \rightarrow S_9$    |  | 3.2%  |  | $S_0 \rightarrow T_9$    | 17.9%    |
| $S_0 \rightarrow S_{10}$ |  | 92.3% |  | $S_0 \rightarrow T_{10}$ | 33.3%    |

The percentage on the arrow is the electron transfer ratio among fragments.

| $(X_2-B-D_5)$            |                                                                                     | Hole  | Particle                                                                            | Hole                     | Particle |
|--------------------------|-------------------------------------------------------------------------------------|-------|-------------------------------------------------------------------------------------|--------------------------|----------|
| $S_0 \rightarrow S_1$    | 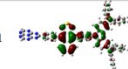 | 42.0% |  | $S_0 \rightarrow T_1$    | 3.4%     |
| $S_0 \rightarrow S_2$    |  | 67.3% |  | $S_0 \rightarrow T_2$    | 97.0%    |
| $S_0 \rightarrow S_3$    |  | 7.7%  |  | $S_0 \rightarrow T_3$    | 7.4%     |
| $S_0 \rightarrow S_4$    |  | 99.1% |  | $S_0 \rightarrow T_4$    | 58.0%    |
| $S_0 \rightarrow S_5$    |  | 96.7% |  | $S_0 \rightarrow T_5$    | 3.4%     |
| $S_0 \rightarrow S_6$    |  | 84.0% |  | $S_0 \rightarrow T_6$    | 98.6%    |
| $S_0 \rightarrow S_7$    |  | 99.3% |  | $S_0 \rightarrow T_7$    | 3.2%     |
| $S_0 \rightarrow S_8$    |  | 3.1%  |  | $S_0 \rightarrow T_8$    | 97.5%    |
| $S_0 \rightarrow S_9$    |  | 83.5% |  | $S_0 \rightarrow T_9$    | 6.3%     |
| $S_0 \rightarrow S_{10}$ |  | 5%    |  | $S_0 \rightarrow T_{10}$ | 2.0%     |

The percentage on the arrow is the electron transfer ratio among fragments.

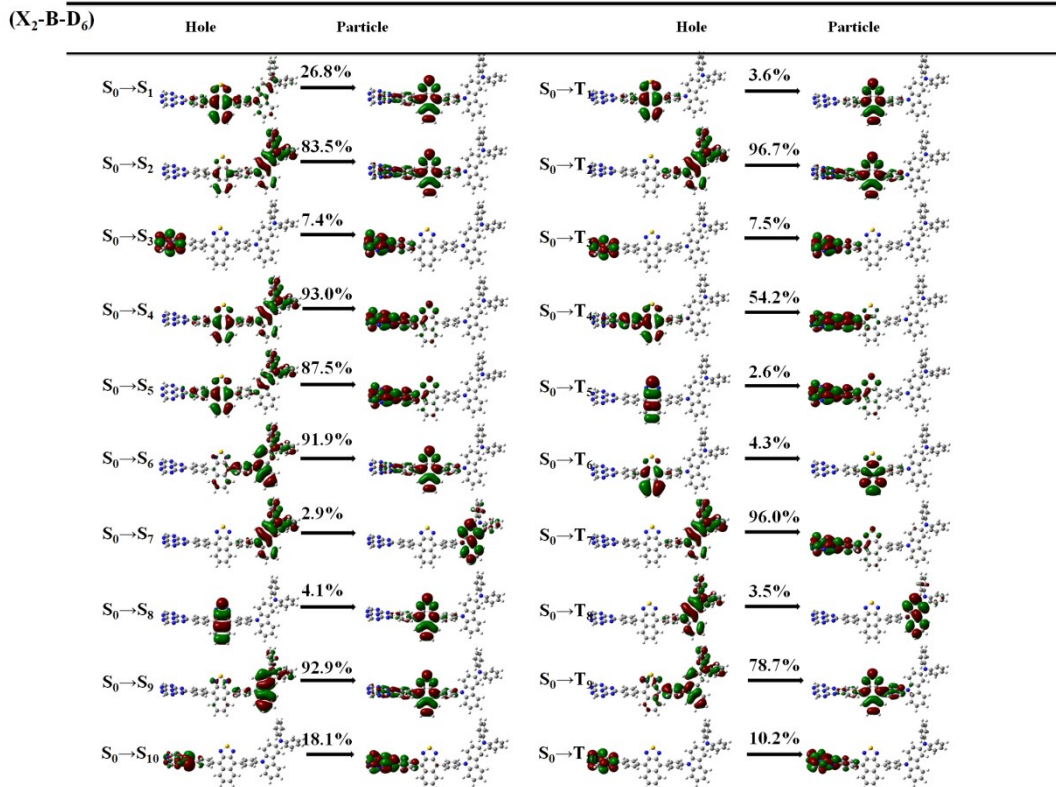

The percentage on the arrow is the electron transfer ratio among fragments.

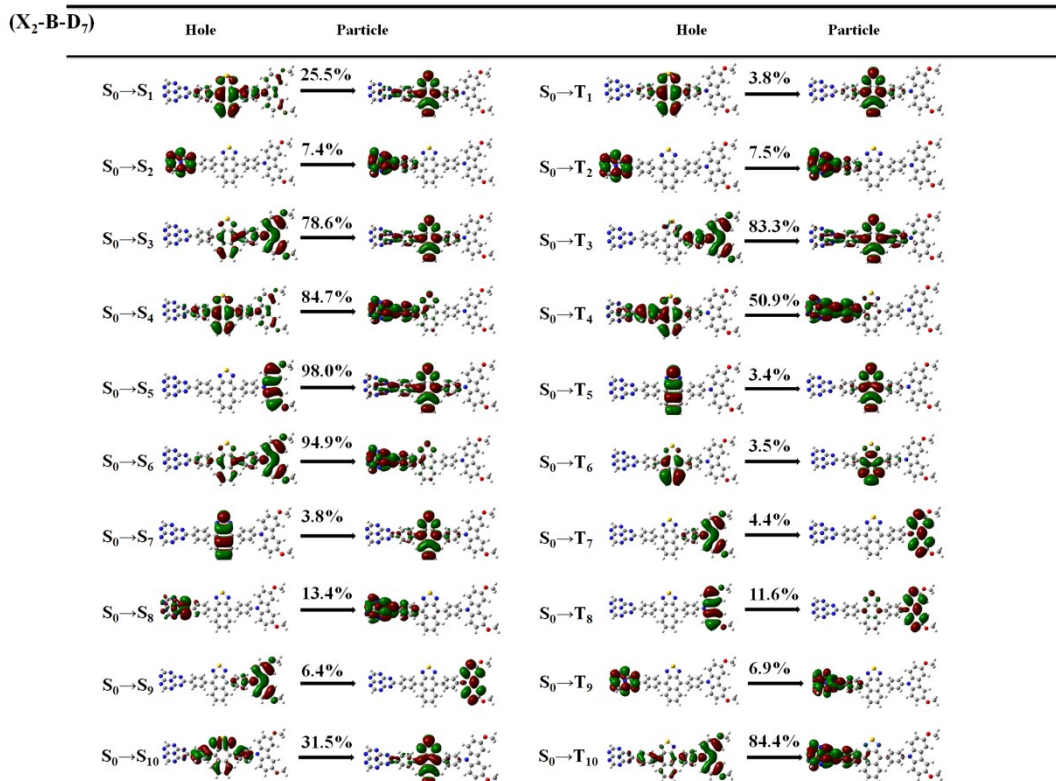

The percentage on the arrow is the electron transfer ratio among fragments.

| $(X_2-B-D_8)$            |  | Hole  | Particle                 | Hole                  | Particle |
|--------------------------|--|-------|--------------------------|-----------------------|----------|
| $S_0 \rightarrow S_1$    |  | 19.2% |                          | $S_0 \rightarrow T_1$ | 4.6%     |
| $S_0 \rightarrow S_2$    |  | 7.2%  | $S_0 \rightarrow T_2$    |                       | 7.0%     |
| $S_0 \rightarrow S_3$    |  | 84.6% | $S_0 \rightarrow T_3$    |                       | 54.2%    |
| $S_0 \rightarrow S_4$    |  | 81.5% | $S_0 \rightarrow T_4$    |                       | 50.5%    |
| $S_0 \rightarrow S_5$    |  | 96.5% | $S_0 \rightarrow T_5$    |                       | 2.1%     |
| $S_0 \rightarrow S_6$    |  | 4.0%  | $S_0 \rightarrow T_6$    |                       | 2.9%     |
| $S_0 \rightarrow S_7$    |  | 13.8% | $S_0 \rightarrow T_7$    |                       | 35.7%    |
| $S_0 \rightarrow S_8$    |  | 35.3% | $S_0 \rightarrow T_8$    |                       | 7.1%     |
| $S_0 \rightarrow S_9$    |  | 25.8% | $S_0 \rightarrow T_9$    |                       | 7.2%     |
| $S_0 \rightarrow S_{10}$ |  | 67.3% | $S_0 \rightarrow T_{10}$ |                       | 67.5%    |

The percentage on the arrow is the electron transfer ratio among fragments.

| $(X_2-B-D_9)$            |  | Hole  | Particle                 | Hole | Particle |
|--------------------------|--|-------|--------------------------|------|----------|
| $S_0 \rightarrow S_1$    |  | 13.9% | $S_0 \rightarrow T_1$    |      | 3.0%     |
| $S_0 \rightarrow S_2$    |  | 7.7%  | $S_0 \rightarrow T_2$    |      | 7.6%     |
| $S_0 \rightarrow S_3$    |  | 93.5% | $S_0 \rightarrow T_3$    |      | 46.0%    |
| $S_0 \rightarrow S_4$    |  | 81.4% | $S_0 \rightarrow T_4$    |      | 7.4%     |
| $S_0 \rightarrow S_5$    |  | 95.2% | $S_0 \rightarrow T_5$    |      | 93.0%    |
| $S_0 \rightarrow S_6$    |  | 98.5% | $S_0 \rightarrow T_6$    |      | 5.2%     |
| $S_0 \rightarrow S_7$    |  | 99.6% | $S_0 \rightarrow T_7$    |      | 7.7%     |
| $S_0 \rightarrow S_8$    |  | 4.0%  | $S_0 \rightarrow T_8$    |      | 70.3%    |
| $S_0 \rightarrow S_9$    |  | 13.5% | $S_0 \rightarrow T_9$    |      | 22.2%    |
| $S_0 \rightarrow S_{10}$ |  | 92.1% | $S_0 \rightarrow T_{10}$ |      | 4.3%     |

The percentage on the arrow is the electron transfer ratio among fragments.

| (X <sub>2</sub> -B-D <sub>10</sub> ) | Hole | Particle | Hole                            | Particle |
|--------------------------------------|------|----------|---------------------------------|----------|
| S <sub>0</sub> →S <sub>1</sub>       |      | 12.9%    | S <sub>0</sub> →T <sub>1</sub>  | 3.3%     |
| S <sub>0</sub> →S <sub>2</sub>       |      | 7.7%     | S <sub>0</sub> →T <sub>2</sub>  | 7.7%     |
| S <sub>0</sub> →S <sub>3</sub>       |      | 94.7%    | S <sub>0</sub> →T <sub>3</sub>  | 26.1%    |
| S <sub>0</sub> →S <sub>4</sub>       |      | 81.1%    | S <sub>0</sub> →T <sub>4</sub>  | 18.9%    |
| S <sub>0</sub> →S <sub>5</sub>       |      | 99.2%    | S <sub>0</sub> →T <sub>5</sub>  | 94.4%    |
| S <sub>0</sub> →S <sub>6</sub>       |      | 98.3%    | S <sub>0</sub> →T <sub>6</sub>  | 5.3%     |
| S <sub>0</sub> →S <sub>7</sub>       |      | 99.1%    | S <sub>0</sub> →T <sub>7</sub>  | 98.5%    |
| S <sub>0</sub> →S <sub>8</sub>       |      | 93.1%    | S <sub>0</sub> →T <sub>8</sub>  | 3.5%     |
| S <sub>0</sub> →S <sub>9</sub>       |      | 99.4%    | S <sub>0</sub> →T <sub>9</sub>  | 7.4%     |
| S <sub>0</sub> →S <sub>10</sub>      |      | 99.7%    | S <sub>0</sub> →T <sub>10</sub> | 0.5%     |

The percentage on the arrow is the electron transfer ratio among fragments.

### SIII: The electron transfer ratio among fragments.

In order to clarify the charge transfer in the designed molecules, we divide the molecule into five fragments, as shown in Fig. SIII-1, and calculate the charge transfer ratio between each fragment, which is listed in the tables below. Fig. SIII-2 shows an example of data interpretation in the tables.

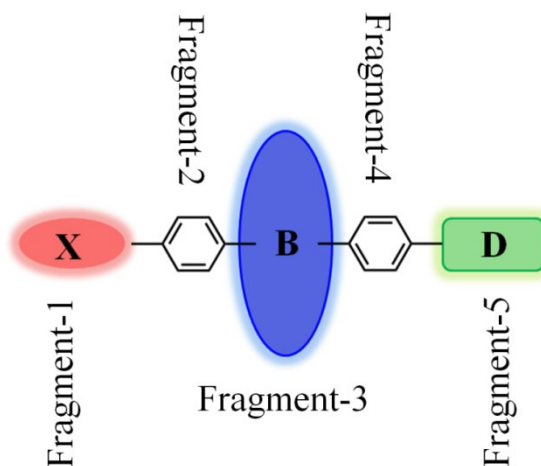

Fig. SIII-1. Schematic diagram of molecular fragment distribution.

$A_1-NZ-D_1$

| $S_1$ | 1 | 2     | 3     | 4            | 5            |
|-------|---|-------|-------|--------------|--------------|
| 1     |   | 0.000 | 0.000 | 0.000        | 0.000        |
| 2     |   |       | 0.000 | 0.000        | <b>0.022</b> |
| 3     |   |       |       | <b>0.017</b> | <b>0.901</b> |
| 4     |   |       |       |              | 0.050        |
| 5     |   |       |       |              |              |

**0.022(2.2%)**

Fragment-2 ↔ Fragment-5

**Electron transfer ratio**

**0.017(1.7%)**

Fragment-3 ↔ Fragment-4

**Electron transfer ratio**

**0.901(90.1%)**

Fragment-3 ↔ Fragment-5

**Electron transfer ratio**

Fig. SIII-2. Illustrative example of electronic transition ratio data.

X<sub>1</sub>-NZ-D<sub>1</sub>

| S <sub>1</sub> | 1 | 2     | 3     | 4     | 5     | S <sub>2</sub> | 1 | 2     | 3     | 4     | 5     | S <sub>3</sub> | 1 | 2     | 3     | 4     | 5     | S <sub>4</sub> | 1 | 2     | 3     | 4     | 5     | S <sub>5</sub> | 1 | 2     | 3     | 4     | 5     |
|----------------|---|-------|-------|-------|-------|----------------|---|-------|-------|-------|-------|----------------|---|-------|-------|-------|-------|----------------|---|-------|-------|-------|-------|----------------|---|-------|-------|-------|-------|
| 1              |   | 0.000 | 0.000 | 0.000 | 0.000 | 1              |   | 0.003 | 0.128 | 0.003 | 0.000 | 1              |   | 0.048 | 0.766 | 0.018 | 0.000 | 1              |   | 0.000 | 0.000 | 0.000 | 0.000 | 1              |   | 0.000 | 0.000 | 0.000 | 0.000 |
| 2              |   |       | 0.000 | 0.000 | 0.022 | 2              |   |       | 0.039 | 0.000 | 0.000 | 2              |   |       | 0.020 | 0.000 | 0.000 | 2              |   |       | 0.000 | 0.000 | 0.000 | 2              |   |       | 0.000 | 0.000 | 0.000 |
| 3              |   |       |       | 0.017 | 0.901 | 3              |   |       |       | 0.041 | 0.000 | 3              |   |       |       | 0.006 | 0.000 | 3              |   |       |       | 0.000 | 0.013 | 3              |   |       |       | 0.004 | 0.131 |
| 4              |   |       |       |       | 0.050 | 4              |   |       |       |       | 0.000 | 4              |   |       |       |       | 0.000 | 4              |   |       |       |       | 0.154 | 4              |   |       |       |       | 0.670 |
| 5              |   |       |       |       |       | 5              |   |       |       |       |       | 5              |   |       |       |       |       | 5              |   |       |       |       |       | 5              |   |       |       |       |       |

| S <sub>6</sub> | 1 | 2     | 3     | 4     | 5     | S <sub>7</sub> | 1 | 2     | 3     | 4     | 5     | S <sub>8</sub> | 1 | 2     | 3     | 4     | 5     | S <sub>9</sub> | 1 | 2     | 3     | 4     | 5     | S <sub>10</sub> | 1 | 2     | 3     | 4     | 5     |
|----------------|---|-------|-------|-------|-------|----------------|---|-------|-------|-------|-------|----------------|---|-------|-------|-------|-------|----------------|---|-------|-------|-------|-------|-----------------|---|-------|-------|-------|-------|
| 1              |   | 0.278 | 0.043 | 0.000 | 0.000 | 1              |   | 0.548 | 0.111 | 0.001 | 0.000 | 1              |   | 0.000 | 0.000 | 0.000 | 0.000 | 1              |   | 0.000 | 0.000 | 0.000 | 0.001 | 1               |   | 0.000 | 0.000 | 0.000 | 0.000 |
| 2              |   |       | 0.001 | 0.000 | 0.000 | 2              |   |       | 0.003 | 0.000 | 0.000 | 2              |   |       | 0.010 | 0.000 | 0.000 | 2              |   |       | 0.000 | 0.000 | 0.016 | 2               |   |       | 0.000 | 0.000 | 0.005 |
| 3              |   |       |       | 0.000 | 0.000 | 3              |   |       |       | 0.000 | 0.000 | 3              |   |       |       | 0.008 | 0.000 | 3              |   |       |       | 0.009 | 0.722 | 3               |   |       |       | 0.003 | 0.208 |
| 4              |   |       |       |       | 0.000 | 4              |   |       |       |       | 0.000 | 4              |   |       |       |       | 0.000 | 4              |   |       |       |       | 0.129 | 4               |   |       |       |       | 0.364 |
| 5              |   |       |       |       |       | 5              |   |       |       |       |       | 5              |   |       |       |       |       | 5              |   |       |       |       |       | 5               |   |       |       |       |       |

| T <sub>1</sub> | 1 | 2     | 3     | 4     | 5     | T <sub>2</sub> | 1 | 2     | 3     | 4     | 5     | T <sub>3</sub> | 1 | 2     | 3     | 4     | 5     | T <sub>4</sub> | 1 | 2     | 3     | 4     | 5     | T <sub>5</sub> | 1 | 2     | 3     | 4     | 5     |
|----------------|---|-------|-------|-------|-------|----------------|---|-------|-------|-------|-------|----------------|---|-------|-------|-------|-------|----------------|---|-------|-------|-------|-------|----------------|---|-------|-------|-------|-------|
| 1              |   | 0.000 | 0.000 | 0.000 | 0.000 | 1              |   | 0.000 | 0.000 | 0.000 | 0.000 | 1              |   | 0.064 | 0.881 | 0.021 | 0.000 | 1              |   | 0.000 | 0.000 | 0.000 | 0.000 | 1              |   | 0.000 | 0.000 | 0.000 | 0.000 |
| 2              |   |       | 0.016 | 0.000 | 0.000 | 2              |   |       | 0.000 | 0.000 | 0.022 | 2              |   |       | 0.022 | 0.001 | 0.000 | 2              |   |       | 0.000 | 0.000 | 0.000 | 2              |   |       | 0.012 | 0.000 | 0.000 |
| 3              |   |       |       | 0.018 | 0.000 | 3              |   |       |       | 0.018 | 0.900 | 3              |   |       |       | 0.000 | 0.000 | 3              |   |       |       | 0.000 | 0.000 | 3              |   |       |       | 0.009 | 0.000 |
| 4              |   |       |       |       | 0.000 | 4              |   |       |       |       | 0.050 | 4              |   |       |       |       | 0.000 | 4              |   |       |       |       | 0.008 | 4              |   |       |       |       | 0.000 |
| 5              |   |       |       |       |       | 5              |   |       |       |       |       | 5              |   |       |       |       |       | 5              |   |       |       |       |       | 5              |   |       |       |       |       |

| T <sub>6</sub> | 1 | 2     | 3     | 4     | 5     | T <sub>7</sub> | 1 | 2     | 3     | 4     | 5     | T <sub>8</sub> | 1 | 2     | 3     | 4     | 5     | T <sub>9</sub> | 1 | 2     | 3     | 4     | 5     | T <sub>10</sub> | 1 | 2     | 3     | 4     | 5     |
|----------------|---|-------|-------|-------|-------|----------------|---|-------|-------|-------|-------|----------------|---|-------|-------|-------|-------|----------------|---|-------|-------|-------|-------|-----------------|---|-------|-------|-------|-------|
| 1              |   | 0.003 | 0.001 | 0.000 | 0.000 | 1              |   | 0.000 | 0.000 | 0.000 | 0.000 | 1              |   | 0.000 | 0.000 | 0.000 | 0.000 | 1              |   | 0.000 | 0.000 | 0.000 | 0.000 | 1               |   | 0.000 | 0.000 | 0.000 | 0.000 |
| 2              |   |       | 0.000 | 0.000 | 0.000 | 2              |   |       | 0.001 | 0.000 | 0.000 | 2              |   |       | 0.000 | 0.000 | 0.000 | 2              |   |       | 0.000 | 0.000 | 0.002 | 2               |   |       | 0.076 | 0.002 | 0.000 |
| 3              |   |       |       | 0.000 | 0.000 | 3              |   |       |       | 0.006 | 0.000 | 3              |   |       |       | 0.000 | 0.005 | 3              |   |       |       | 0.000 | 0.000 | 3               |   |       |       | 0.100 | 0.000 |
| 4              |   |       |       |       | 0.000 | 4              |   |       |       |       | 0.000 | 4              |   |       |       |       | 0.075 | 4              |   |       |       |       | 0.010 | 4               |   |       |       |       | 0.000 |
| 5              |   |       |       |       |       | 5              |   |       |       |       |       | 5              |   |       |       |       |       | 5              |   |       |       |       |       | 5               |   |       |       |       |       |

X<sub>1</sub>-NZ-D<sub>2</sub>

| S <sub>1</sub> | 1 | 2     | 3     | 4     | 5     | S <sub>2</sub> | 1 | 2     | 3     | 4     | 5     | S <sub>3</sub> | 1 | 2     | 3     | 4     | 5     | S <sub>4</sub> | 1 | 2     | 3     | 4     | 5     | S <sub>5</sub> | 1 | 2     | 3     | 4     | 5     |
|----------------|---|-------|-------|-------|-------|----------------|---|-------|-------|-------|-------|----------------|---|-------|-------|-------|-------|----------------|---|-------|-------|-------|-------|----------------|---|-------|-------|-------|-------|
| 1              |   | 0.000 | 0.000 | 0.000 | 0.000 | 1              |   | 0.004 | 0.167 | 0.003 | 0.000 | 1              |   | 0.042 | 0.735 | 0.156 | 0.000 | 1              |   | 0.000 | 0.000 | 0.000 | 0.001 | 1              |   | 0.000 | 0.000 | 0.000 | 0.000 |
| 2              |   |       | 0.000 | 0.000 | 0.021 | 2              |   |       | 0.035 | 0.000 | 0.000 | 2              |   |       | 0.022 | 0.000 | 0.000 | 2              |   |       | 0.000 | 0.000 | 0.021 | 2              |   |       | 0.000 | 0.000 | 0.011 |
| 3              |   |       |       | 0.015 | 0.909 | 3              |   |       |       | 0.037 | 0.002 | 3              |   |       |       | 0.008 | 0.000 | 3              |   |       |       | 0.941 | 0.029 | 3              |   |       |       | 0.011 | 0.569 |
| 4              |   |       |       |       | 0.042 | 4              |   |       |       |       | 0.000 | 4              |   |       |       |       | 0.000 | 4              |   |       |       |       |       | 4              |   |       |       |       | 0.371 |
| 5              |   |       |       |       |       | 5              |   |       |       |       |       | 5              |   |       |       |       |       | 5              |   |       |       |       |       | 5              |   |       |       |       |       |



| S <sub>6</sub> | 1 | 2     | 3     | 4     | 5     | S <sub>7</sub> | 1 | 2     | 3     | 4     | 5     | S <sub>8</sub> | 1 | 2     | 3     | 4     | 5     | S <sub>9</sub> | 1 | 2     | 3     | 4     | 5     | S <sub>10</sub> | 1 | 2     | 3     | 4     | 5     |
|----------------|---|-------|-------|-------|-------|----------------|---|-------|-------|-------|-------|----------------|---|-------|-------|-------|-------|----------------|---|-------|-------|-------|-------|-----------------|---|-------|-------|-------|-------|
| 1              |   | 0.000 | 0.000 | 0.000 | 0.000 | 1              |   | 0.445 | 0.075 | 0.001 | 0.002 | 1              |   | 0.392 | 0.071 | 0.001 | 0.000 | 1              |   | 0.000 | 0.000 | 0.000 | 0.000 | 1               |   | 0.000 | 0.000 | 0.000 | 0.001 |
| 2              |   |       | 0.000 | 0.000 | 0.000 | 2              |   |       | 0.000 | 0.000 | 0.000 | 2              |   |       | 0.002 | 0.000 | 0.000 | 2              |   |       | 0.007 | 0.000 | 0.000 | 2               |   |       | 0.000 | 0.000 | 0.008 |
| 3              |   |       |       | 0.000 | 0.001 | 3              |   |       |       | 0.000 | 0.000 | 3              |   |       |       | 0.000 | 0.000 | 3              |   |       |       | 0.008 | 0.000 | 3               |   |       |       | 0.011 | 0.483 |
| 4              |   |       |       |       | 0.075 | 4              |   |       |       |       | 0.000 | 4              |   |       |       | 0.000 |       | 4              |   |       |       |       | 0.000 | 4               |   |       |       |       | 0.430 |
| 5              |   |       |       |       |       | 5              |   |       |       |       |       | 5              |   |       |       |       |       | 5              |   |       |       |       |       | 5               |   |       |       |       |       |

| T <sub>1</sub> | 1 | 2     | 3     | 4     | 5     | T <sub>2</sub> | 1 | 2     | 3     | 4     | 5     | T <sub>3</sub> | 1 | 2     | 3     | 4     | 5     | T <sub>4</sub> | 1 | 2     | 3     | 4     | 5     | T <sub>5</sub> | 1 | 2     | 3     | 4     | 5     |
|----------------|---|-------|-------|-------|-------|----------------|---|-------|-------|-------|-------|----------------|---|-------|-------|-------|-------|----------------|---|-------|-------|-------|-------|----------------|---|-------|-------|-------|-------|
| 1              |   | 0.000 | 0.000 | 0.000 | 0.000 | 1              |   | 0.000 | 0.000 | 0.000 | 0.000 | 1              |   | 0.060 | 0.887 | 0.020 | 0.000 | 1              |   | 0.000 | 0.000 | 0.000 | 0.000 | 1              |   | 0.000 | 0.000 | 0.000 | 0.001 |
| 2              |   |       | 0.017 | 0.000 | 0.000 | 2              |   |       | 0.000 | 0.000 | 0.021 | 2              |   |       | 0.023 | 0.000 | 0.000 | 2              |   |       | 0.009 | 0.000 | 0.000 | 2              |   |       | 0.000 | 0.000 | 0.021 |
| 3              |   |       |       | 0.016 | 0.000 | 3              |   |       |       | 0.015 | 0.909 | 3              |   |       |       | 0.000 | 0.000 | 3              |   |       |       | 0.009 | 0.000 | 3              |   |       |       | 0.002 | 0.940 |
| 4              |   |       |       |       | 0.000 | 4              |   |       |       |       | 0.042 | 4              |   |       |       | 0.000 |       | 4              |   |       |       |       | 0.000 | 4              |   |       |       |       | 0.029 |
| 5              |   |       |       |       |       | 5              |   |       |       |       |       | 5              |   |       |       |       |       | 5              |   |       |       |       |       | 5              |   |       |       |       |       |

| T <sub>6</sub> | 1 | 2     | 3     | 4     | 5     | T <sub>7</sub> | 1 | 2     | 3     | 4     | 5     | T <sub>8</sub> | 1 | 2     | 3     | 4     | 5     | T <sub>9</sub> | 1 | 2     | 3     | 4     | 5     | T <sub>10</sub> | 1 | 2     | 3     | 4     | 5     |
|----------------|---|-------|-------|-------|-------|----------------|---|-------|-------|-------|-------|----------------|---|-------|-------|-------|-------|----------------|---|-------|-------|-------|-------|-----------------|---|-------|-------|-------|-------|
| 1              |   | 0.004 | 0.000 | 0.000 | 0.001 | 1              |   | 0.000 | 0.000 | 0.000 | 0.000 | 1              |   | 0.000 | 0.001 | 0.000 | 0.000 | 1              |   | 0.000 | 0.000 | 0.000 | 0.000 | 1               |   | 0.000 | 0.000 | 0.000 | 0.000 |
| 2              |   |       | 0.000 | 0.000 | 0.000 | 2              |   |       | 0.000 | 0.000 | 0.000 | 2              |   |       | 0.002 | 0.000 | 0.000 | 2              |   |       | 0.000 | 0.000 | 0.000 | 2               |   |       | 0.000 | 0.000 | 0.000 |
| 3              |   |       |       | 0.000 | 0.000 | 3              |   |       |       | 0.000 | 0.000 | 3              |   |       |       | 0.000 | 0.000 | 3              |   |       |       | 0.000 | 0.000 | 3               |   |       |       | 0.000 | 0.001 |
| 4              |   |       |       |       | 0.000 | 4              |   |       |       |       | 0.003 | 4              |   |       |       | 0.000 |       | 4              |   |       |       |       | 0.006 | 4               |   |       |       |       | 0.001 |
| 5              |   |       |       |       |       | 5              |   |       |       |       |       | 5              |   |       |       |       |       | 5              |   |       |       |       |       | 5               |   |       |       |       |       |

X<sub>1</sub>-NZ-D<sub>3</sub>

| S <sub>1</sub> | 1 | 2     | 3     | 4     | 5     | S <sub>2</sub> | 1 | 2     | 3     | 4     | 5     | S <sub>3</sub> | 1 | 2     | 3     | 4     | 5     | S <sub>4</sub> | 1 | 2     | 3     | 4     | 5     | S <sub>5</sub> | 1 | 2     | 3     | 4     | 5     |
|----------------|---|-------|-------|-------|-------|----------------|---|-------|-------|-------|-------|----------------|---|-------|-------|-------|-------|----------------|---|-------|-------|-------|-------|----------------|---|-------|-------|-------|-------|
| 1              |   | 0.000 | 0.003 | 0.000 | 0.000 | 1              |   | 0.063 | 0.855 | 0.024 | 0.005 | 1              |   | 0.000 | 0.016 | 0.000 | 0.000 | 1              |   | 0.000 | 0.000 | 0.000 | 0.000 | 1              |   | 0.000 | 0.000 | 0.000 | 0.000 |
| 2              |   |       | 0.023 | 0.003 | 0.006 | 2              |   |       | 0.024 | 0.000 | 0.001 | 2              |   |       | 0.017 | 0.000 | 0.010 | 2              |   |       | 0.000 | 0.000 | 0.023 | 2              |   |       | 0.002 | 0.006 | 0.014 |
| 3              |   |       |       | 0.182 | 0.261 | 3              |   |       |       | 0.002 | 0.012 | 3              |   |       |       | 0.019 | 0.439 | 3              |   |       |       | 0.006 | 0.913 | 3              |   |       |       | 0.232 | 0.568 |
| 4              |   |       |       |       | 0.008 | 4              |   |       |       |       | 0.000 | 4              |   |       |       | 0.013 |       | 4              |   |       |       |       | 0.035 | 4              |   |       |       |       | 0.022 |
| 5              |   |       |       |       |       | 5              |   |       |       |       |       | 5              |   |       |       |       |       | 5              |   |       |       |       |       | 5              |   |       |       |       |       |

| S <sub>6</sub> | 1 | 2     | 3     | 4     | 5     | S <sub>7</sub> | 1 | 2     | 3     | 4     | 5     | S <sub>8</sub> | 1 | 2     | 3     | 4     | 5     | S <sub>9</sub> | 1 | 2     | 3     | 4     | 5     | S <sub>10</sub> | 1 | 2     | 3     | 4     | 5     |
|----------------|---|-------|-------|-------|-------|----------------|---|-------|-------|-------|-------|----------------|---|-------|-------|-------|-------|----------------|---|-------|-------|-------|-------|-----------------|---|-------|-------|-------|-------|
| 1              |   | 0.000 | 0.000 | 0.000 | 0.000 | 1              |   | 0.079 | 0.005 | 0.000 | 0.000 | 1              |   | 0.000 | 0.000 | 0.000 | 0.000 | 1              |   | 0.513 | 0.177 | 0.018 | 0.064 | 1               |   | 0.012 | 0.025 | 0.019 | 0.053 |
| 2              |   |       | 0.000 | 0.000 | 0.000 | 2              |   |       | 0.000 | 0.000 | 0.000 | 2              |   |       | 0.001 | 0.001 | 0.001 | 2              |   |       | 0.006 | 0.026 | 0.000 | 2               |   |       | 0.019 | 0.009 | 0.054 |
| 3              |   |       |       | 0.001 | 0.004 | 3              |   |       |       | 0.000 | 0.000 | 3              |   |       |       | 0.053 | 0.066 | 3              |   |       |       | 0.000 | 0.007 | 3               |   |       |       | 0.013 | 0.025 |
| 4              |   |       |       |       | 0.075 | 4              |   |       |       |       | 0.000 | 4              |   |       |       | 0.038 |       | 4              |   |       |       |       | 0.000 | 4               |   |       |       |       | 0.047 |
| 5              |   |       |       |       |       | 5              |   |       |       |       |       | 5              |   |       |       |       |       | 5              |   |       |       |       |       | 5               |   |       |       |       |       |

| T <sub>1</sub> | 1 | 2 | 3 | 4 | 5 | T <sub>2</sub> | 1 | 2 | 3 | 4 | 5 | T <sub>3</sub> | 1 | 2 | 3 | 4 | 5 | T <sub>4</sub> | 1 | 2 | 3 | 4 | 5 | T <sub>5</sub> | 1 | 2 | 3 | 4 | 5 |
|----------------|---|---|---|---|---|----------------|---|---|---|---|---|----------------|---|---|---|---|---|----------------|---|---|---|---|---|----------------|---|---|---|---|---|
|----------------|---|---|---|---|---|----------------|---|---|---|---|---|----------------|---|---|---|---|---|----------------|---|---|---|---|---|----------------|---|---|---|---|---|

|   |       |       |       |       |   |       |       |       |       |   |       |       |       |       |   |       |       |       |       |   |       |       |       |       |
|---|-------|-------|-------|-------|---|-------|-------|-------|-------|---|-------|-------|-------|-------|---|-------|-------|-------|-------|---|-------|-------|-------|-------|
| 1 | 0.000 | 0.000 | 0.000 | 0.000 | 1 | 0.000 | 0.000 | 0.000 | 0.000 | 1 | 0.066 | 0.869 | 0.024 | 0.005 | 1 | 0.000 | 0.000 | 0.000 | 0.000 | 1 | 0.006 | 0.001 | 0.000 | 0.000 |
| 2 |       | 0.016 | 0.000 | 0.000 | 2 |       | 0.000 | 0.005 | 0.014 | 2 |       | 0.024 | 0.000 | 0.000 | 2 |       | 0.012 | 0.000 | 0.000 | 2 |       | 0.000 | 0.000 | 0.000 |
| 3 |       |       | 0.036 | 0.012 | 3 |       |       | 0.211 | 0.560 | 3 |       |       | 0.000 | 0.000 | 3 |       |       | 0.016 | 0.005 | 3 |       |       | 0.000 | 0.000 |
| 4 |       |       |       | 0.000 | 4 |       |       |       | 0.054 | 4 |       |       |       | 0.000 | 4 |       |       |       | 0.000 | 4 |       |       |       | 0.000 |
| 5 |       |       |       |       | 5 |       |       |       |       | 5 |       |       |       |       | 5 |       |       |       |       | 5 |       |       |       |       |

| T <sub>6</sub> | 1     | 2     | 3     | 4     | 5 | T <sub>7</sub> | 1     | 2     | 3     | 4 | 5     | T <sub>8</sub> | 1     | 2     | 3 | 4     | 5     | T <sub>9</sub> | 1     | 2 | 3     | 4     | 5     | T <sub>10</sub> | 1 | 2 | 3 | 4 | 5 |
|----------------|-------|-------|-------|-------|---|----------------|-------|-------|-------|---|-------|----------------|-------|-------|---|-------|-------|----------------|-------|---|-------|-------|-------|-----------------|---|---|---|---|---|
| 1              | 0.000 | 0.000 | 0.000 | 0.000 | 1 | 0.000          | 0.000 | 0.000 | 0.000 | 1 | 0.000 | 0.000          | 0.000 | 0.000 | 1 | 0.000 | 0.000 | 0.000          | 0.001 | 1 | 0.000 | 0.000 | 0.000 | 0.000           |   |   |   |   |   |
| 2              |       | 0.000 | 0.000 | 0.000 | 2 |                | 0.000 | 0.000 | 0.000 | 2 |       | 0.000          | 0.000 | 0.000 | 2 |       | 0.000 | 0.000          | 0.021 | 2 |       | 0.007 | 0.002 | 0.013           |   |   |   |   |   |
| 3              |       |       | 0.001 | 0.016 | 3 |                |       | 0.011 | 0.030 | 3 |       |                | 0.005 | 0.086 | 3 |       |       | 0.033          | 0.785 | 3 |       |       | 0.092 | 0.383           |   |   |   |   |   |
| 4              |       |       |       | 0.034 | 4 |                |       |       | 0.002 | 4 |       |                |       | 0.069 | 4 |       |       |                | 0.040 | 4 |       |       |       | 0.062           |   |   |   |   |   |
| 5              |       |       |       |       | 5 |                |       |       |       | 5 |       |                |       |       | 5 |       |       |                |       | 5 |       |       |       |                 |   |   |   |   |   |

X<sub>1</sub>-NZ-D<sub>4</sub>

| S <sub>1</sub> | 1     | 2     | 3     | 4     | 5 | S <sub>2</sub> | 1     | 2     | 3     | 4 | 5     | S <sub>3</sub> | 1     | 2     | 3 | 4     | 5     | S <sub>4</sub> | 1     | 2 | 3     | 4     | 5     | S <sub>5</sub> | 1 | 2 | 3 | 4 | 5 |
|----------------|-------|-------|-------|-------|---|----------------|-------|-------|-------|---|-------|----------------|-------|-------|---|-------|-------|----------------|-------|---|-------|-------|-------|----------------|---|---|---|---|---|
| 1              | 0.000 | 0.000 | 0.000 | 0.000 | 1 | 0.000          | 0.000 | 0.000 | 0.000 | 1 | 0.062 | 0.884          | 0.020 | 0.001 | 1 | 0.000 | 0.000 | 0.000          | 0.000 | 1 | 0.000 | 0.000 | 0.000 | 0.000          |   |   |   |   |   |
| 2              |       | 0.196 | 0.000 | 0.000 | 2 |                | 0.000 | 0.000 | 0.020 | 2 |       | 0.022          | 0.000 | 0.000 | 2 |       | 0.000 | 0.000          | 0.020 | 2 |       | 0.000 | 0.000 | 0.000          |   |   |   |   |   |
| 3              |       |       | 0.142 | 0.000 | 3 |                |       | 0.020 | 0.896 | 3 |       |                | 0.000 | 0.000 | 3 |       |       | 0.005          | 0.929 | 3 |       |       | 0.000 | 0.000          |   |   |   |   |   |
| 4              |       |       |       | 0.000 | 4 |                |       |       | 0.048 | 4 |       |                |       | 0.000 | 4 |       |       |                | 0.032 | 4 |       |       |       | 0.029          |   |   |   |   |   |
| 5              |       |       |       |       | 5 |                |       |       |       | 5 |       |                |       |       | 5 |       |       |                |       | 5 |       |       |       |                |   |   |   |   |   |

| S <sub>6</sub> | 1     | 2     | 3     | 4     | 5 | S <sub>7</sub> | 1     | 2     | 3     | 4 | 5     | S <sub>8</sub> | 1     | 2     | 3 | 4     | 5     | S <sub>9</sub> | 1     | 2 | 3     | 4     | 5     | S <sub>10</sub> | 1 | 2 | 3 | 4 | 5 |
|----------------|-------|-------|-------|-------|---|----------------|-------|-------|-------|---|-------|----------------|-------|-------|---|-------|-------|----------------|-------|---|-------|-------|-------|-----------------|---|---|---|---|---|
| 1              | 0.073 | 0.002 | 0.000 | 0.000 | 1 | 0.765          | 0.145 | 0.000 | 0.000 | 1 | 0.000 | 0.000          | 0.000 | 0.000 | 1 | 0.000 | 0.000 | 0.000          | 0.000 | 1 | 0.000 | 0.000 | 0.000 | 0.000           |   |   |   |   |   |
| 2              |       | 0.000 | 0.000 | 0.000 | 2 |                | 0.005 | 0.000 | 0.000 | 2 |       | 0.000          | 0.000 | 0.007 | 2 |       | 0.009 | 0.000          | 0.000 | 2 |       | 0.006 | 0.001 | 0.015           |   |   |   |   |   |
| 3              |       |       | 0.000 | 0.000 | 3 |                |       | 0.000 | 0.000 | 3 |       |                | 0.009 | 0.371 | 3 |       |       | 0.006          | 0.000 | 3 |       |       | 0.013 | 0.656           |   |   |   |   |   |
| 4              |       |       |       | 0.000 | 4 |                |       |       | 0.000 | 4 |       |                |       | 0.562 | 4 |       |       |                | 0.000 | 4 |       |       |       | 0.206           |   |   |   |   |   |
| 5              |       |       |       |       | 5 |                |       |       |       | 5 |       |                |       |       | 5 |       |       |                |       | 5 |       |       |       |                 |   |   |   |   |   |

| T <sub>1</sub> | 1     | 2     | 3     | 4     | 5 | T <sub>2</sub> | 1     | 2     | 3     | 4 | 5     | T <sub>3</sub> | 1     | 2     | 3 | 4     | 5     | T <sub>4</sub> | 1     | 2 | 3     | 4     | 5     | T <sub>5</sub> | 1 | 2 | 3 | 4 | 5 |
|----------------|-------|-------|-------|-------|---|----------------|-------|-------|-------|---|-------|----------------|-------|-------|---|-------|-------|----------------|-------|---|-------|-------|-------|----------------|---|---|---|---|---|
| 1              | 0.000 | 0.000 | 0.000 | 0.000 | 1 | 0.000          | 0.000 | 0.000 | 0.000 | 1 | 0.063 | 0.882          | 0.020 | 0.001 | 1 | 0.000 | 0.000 | 0.000          | 0.000 | 1 | 0.000 | 0.000 | 0.000 | 0.000          |   |   |   |   |   |
| 2              |       | 0.016 | 0.000 | 0.000 | 2 |                | 0.000 | 0.000 | 0.020 | 2 |       | 0.023          | 0.000 | 0.000 | 2 |       | 0.011 | 0.000          | 0.000 | 2 |       | 0.000 | 0.000 | 0.000          |   |   |   |   |   |
| 3              |       |       | 0.016 | 0.002 | 3 |                |       | 0.020 | 0.899 | 3 |       |                | 0.000 | 0.000 | 3 |       |       | 0.010          | 0.000 | 3 |       |       | 0.000 | 0.001          |   |   |   |   |   |
| 4              |       |       |       | 0.000 | 4 |                |       |       | 0.048 | 4 |       |                |       | 0.000 | 4 |       |       |                | 0.000 | 4 |       |       |       | 0.000          |   |   |   |   |   |
| 5              |       |       |       |       | 5 |                |       |       |       | 5 |       |                |       |       | 5 |       |       |                |       | 5 |       |       |       |                |   |   |   |   |   |

| T <sub>6</sub> | 1     | 2     | 3     | 4     | 5 | T <sub>7</sub> | 1     | 2     | 3     | 4 | 5     | T <sub>8</sub> | 1     | 2     | 3 | 4     | 5     | T <sub>9</sub> | 1     | 2 | 3     | 4     | 5     | T <sub>10</sub> | 1 | 2 | 3 | 4 | 5 |
|----------------|-------|-------|-------|-------|---|----------------|-------|-------|-------|---|-------|----------------|-------|-------|---|-------|-------|----------------|-------|---|-------|-------|-------|-----------------|---|---|---|---|---|
| 1              | 0.003 | 0.001 | 0.000 | 0.000 | 1 | 0.000          | 0.001 | 0.000 | 0.000 | 1 | 0.000 | 0.000          | 0.000 | 0.000 | 1 | 0.000 | 0.000 | 0.000          | 0.000 | 1 | 0.000 | 0.000 | 0.000 | 0.000           |   |   |   |   |   |

|   |       |       |       |       |       |       |       |       |       |       |       |   |       |       |       |   |       |       |       |
|---|-------|-------|-------|-------|-------|-------|-------|-------|-------|-------|-------|---|-------|-------|-------|---|-------|-------|-------|
| 2 | 0.000 | 0.000 | 0.000 | 2     | 0.001 | 0.000 | 0.000 | 2     | 0.000 | 0.000 | 0.000 | 2 | 0.011 | 0.000 | 0.019 | 2 | 0.000 | 0.000 | 0.008 |
| 3 | 0.000 | 0.000 | 3     | 0.001 | 0.001 | 3     | 0.000 | 0.001 | 3     | 0.027 | 0.816 | 3 | 0.099 | 0.127 |       |   |       |       |       |
| 4 | 0.000 | 4     | 0.000 | 4     | 0.005 | 4     | 0.027 | 4     | 0.010 |       |       |   |       |       |       |   |       |       |       |
| 5 | 5     | 5     | 5     | 5     |       |       |       |       |       |       |       |   |       |       |       |   |       |       |       |

X<sub>1</sub>-NZ-D<sub>5</sub>

| S <sub>1</sub> | 1     | 2     | 3     | 4     | 5     | S <sub>2</sub> | 1     | 2     | 3     | 4     | 5     | S <sub>3</sub> | 1     | 2     | 3     | 4     | 5     | S <sub>4</sub> | 1     | 2 | 3     | 4     | 5     | S <sub>5</sub> | 1     | 2     | 3     | 4     | 5     |
|----------------|-------|-------|-------|-------|-------|----------------|-------|-------|-------|-------|-------|----------------|-------|-------|-------|-------|-------|----------------|-------|---|-------|-------|-------|----------------|-------|-------|-------|-------|-------|
| 1              | 0.000 | 0.024 | 0.000 | 0.000 | 1     | 0.058          | 0.854 | 0.021 | 0.002 | 1     | 0.000 | 0.004          | 0.000 | 0.000 | 1     | 0.000 | 0.000 | 0.000          | 0.000 | 1 | 0.000 | 0.000 | 0.000 | 0.000          | 1     | 0.000 | 0.000 | 0.000 | 0.000 |
| 2              | 0.031 | 0.000 | 0.005 | 2     | 0.022 | 0.000          | 0.001 | 2     | 0.013 | 0.000 | 0.015 | 2              | 0.000 | 0.000 | 0.022 | 2     | 0.000 | 0.000          | 0.022 | 2 | 0.000 | 0.000 | 0.000 | 2              | 0.000 | 0.000 | 0.000 | 0.000 |       |
| 3              | 0.081 | 0.223 | 3     | 0.002 | 0.018 | 3              | 0.014 | 0.640 | 3     | 0.001 | 0.933 | 3              | 0.000 | 0.003 |       |       |       |                |       |   |       |       |       |                |       |       |       |       |       |
| 4              | 0.007 | 4     | 0.000 | 4     | 0.020 | 4              | 0.033 | 4     | 0.030 |       |       |                |       |       |       |       |       |                |       |   |       |       |       |                |       |       |       |       |       |
| 5              | 5     | 5     | 5     | 5     |       |                |       |       |       |       |       |                |       |       |       |       |       |                |       |   |       |       |       |                |       |       |       |       |       |

| S <sub>6</sub> | 1     | 2     | 3     | 4     | 5     | S <sub>7</sub> | 1     | 2     | 3     | 4     | 5     | S <sub>8</sub> | 1     | 2     | 3     | 4     | 5     | S <sub>9</sub> | 1     | 2 | 3     | 4     | 5     | S <sub>10</sub> | 1     | 2     | 3     | 4     | 5     |
|----------------|-------|-------|-------|-------|-------|----------------|-------|-------|-------|-------|-------|----------------|-------|-------|-------|-------|-------|----------------|-------|---|-------|-------|-------|-----------------|-------|-------|-------|-------|-------|
| 1              | 0.000 | 0.000 | 0.000 | 0.000 | 1     | 0.429          | 0.079 | 0.000 | 0.001 | 1     | 0.392 | 0.075          | 0.000 | 0.000 | 1     | 0.000 | 0.000 | 0.000          | 0.000 | 1 | 0.000 | 0.000 | 0.000 | 0.000           | 1     | 0.000 | 0.000 | 0.000 | 0.000 |
| 2              | 0.000 | 0.005 | 0.011 | 2     | 0.002 | 0.000          | 0.001 | 2     | 0.002 | 0.000 | 0.000 | 2              | 0.005 | 0.000 | 0.000 | 2     | 0.000 | 0.000          | 0.000 | 2 | 0.000 | 0.000 | 0.000 | 2               | 0.000 | 0.000 | 0.000 | 0.000 |       |
| 3              | 0.252 | 0.505 | 3     | 0.000 | 0.000 | 3              | 0.000 | 0.000 | 3     | 0.013 | 0.002 | 3              | 0.000 | 0.005 |       |       |       |                |       |   |       |       |       |                 |       |       |       |       |       |
| 4              | 0.026 | 4     | 0.000 | 4     | 0.000 | 4              | 0.000 | 4     | 0.000 |       |       |                |       |       |       |       |       |                |       |   |       |       |       |                 |       |       |       |       |       |
| 5              | 5     | 5     | 5     | 5     |       |                |       |       |       |       |       |                |       |       |       |       |       |                |       |   |       |       |       |                 |       |       |       |       |       |

| T <sub>1</sub> | 1     | 2     | 3     | 4     | 5     | T <sub>2</sub> | 1     | 2     | 3     | 4     | 5     | T <sub>3</sub> | 1     | 2     | 3     | 4     | 5     | T <sub>4</sub> | 1     | 2 | 3     | 4     | 5     | T <sub>5</sub> | 1     | 2     | 3     | 4     | 5     |
|----------------|-------|-------|-------|-------|-------|----------------|-------|-------|-------|-------|-------|----------------|-------|-------|-------|-------|-------|----------------|-------|---|-------|-------|-------|----------------|-------|-------|-------|-------|-------|
| 1              | 0.000 | 0.000 | 0.000 | 0.000 | 1     | 0.062          | 0.879 | 0.022 | 0.002 | 1     | 0.000 | 0.000          | 0.000 | 0.000 | 1     | 0.000 | 0.000 | 0.000          | 0.000 | 1 | 0.000 | 0.000 | 0.000 | 0.000          | 1     | 0.000 | 0.000 | 0.000 | 0.000 |
| 2              | 0.017 | 0.000 | 0.000 | 2     | 0.024 | 0.000          | 0.000 | 2     | 0.000 | 0.002 | 0.020 | 2              | 0.012 | 0.000 | 0.000 | 2     | 0.000 | 0.000          | 0.000 | 2 | 0.000 | 0.000 | 0.000 | 2              | 0.000 | 0.000 | 0.023 |       |       |
| 3              | 0.020 | 0.002 | 3     | 0.000 | 0.000 | 3              | 0.072 | 0.825 | 3     | 0.010 | 0.000 | 3              | 0.001 | 0.915 |       |       |       |                |       |   |       |       |       |                |       |       |       |       |       |
| 4              | 0.000 | 4     | 0.000 | 4     | 0.048 | 4              | 0.000 | 4     | 0.037 |       |       |                |       |       |       |       |       |                |       |   |       |       |       |                |       |       |       |       |       |
| 5              | 5     | 5     | 5     | 5     |       |                |       |       |       |       |       |                |       |       |       |       |       |                |       |   |       |       |       |                |       |       |       |       |       |

| T <sub>6</sub> | 1     | 2     | 3     | 4     | 5     | T <sub>7</sub> | 1     | 2     | 3     | 4     | 5     | T <sub>8</sub> | 1     | 2     | 3     | 4     | 5     | T <sub>9</sub> | 1     | 2 | 3     | 4     | 5     | T <sub>10</sub> | 1     | 2     | 3     | 4     | 5     |
|----------------|-------|-------|-------|-------|-------|----------------|-------|-------|-------|-------|-------|----------------|-------|-------|-------|-------|-------|----------------|-------|---|-------|-------|-------|-----------------|-------|-------|-------|-------|-------|
| 1              | 0.000 | 0.000 | 0.000 | 0.000 | 1     | 0.003          | 0.001 | 0.000 | 0.000 | 1     | 0.000 | 0.000          | 0.000 | 0.000 | 1     | 0.000 | 0.000 | 0.000          | 0.000 | 1 | 0.000 | 0.000 | 0.000 | 0.000           | 1     | 0.000 | 0.000 | 0.000 | 0.000 |
| 2              | 0.000 | 0.000 | 0.000 | 2     | 0.000 | 0.000          | 0.000 | 2     | 0.003 | 0.000 | 0.000 | 2              | 0.000 | 0.000 | 0.000 | 2     | 0.000 | 0.000          | 0.000 | 2 | 0.000 | 0.000 | 0.000 | 2               | 0.000 | 0.000 | 0.000 | 0.000 |       |
| 3              | 0.000 | 0.029 | 3     | 0.000 | 0.000 | 3              | 0.007 | 0.000 | 3     | 0.000 | 0.015 | 3              | 0.000 | 0.002 |       |       |       |                |       |   |       |       |       |                 |       |       |       |       |       |
| 4              | 4     | 0.000 | 4     | 0.000 | 4     | 0.003          | 4     | 0.003 | 4     | 0.003 |       |                |       |       |       |       |       |                |       |   |       |       |       |                 |       |       |       |       |       |
| 5              | 5     | 5     | 5     | 5     |       |                |       |       |       |       |       |                |       |       |       |       |       |                |       |   |       |       |       |                 |       |       |       |       |       |

X<sub>1</sub>-NZ-D<sub>6</sub>

| S <sub>1</sub> | 1     | 2     | 3     | 4     | 5 | S <sub>2</sub> | 1     | 2     | 3     | 4 | 5     | S <sub>3</sub> | 1     | 2     | 3 | 4     | 5     | S <sub>4</sub> | 1     | 2 | 3     | 4     | 5     | S <sub>5</sub> | 1 | 2     | 3     | 4     | 5     |
|----------------|-------|-------|-------|-------|---|----------------|-------|-------|-------|---|-------|----------------|-------|-------|---|-------|-------|----------------|-------|---|-------|-------|-------|----------------|---|-------|-------|-------|-------|
| 1              | 0.000 | 0.023 | 0.001 | 0.000 | 1 | 0.099          | 0.864 | 0.022 | 0.002 | 1 | 0.000 | 0.001          | 0.000 | 0.001 | 1 | 0.000 | 0.000 | 0.000          | 0.000 | 1 | 0.000 | 0.000 | 0.000 | 0.000          | 1 | 0.000 | 0.000 | 0.000 | 0.000 |

|                |       |       |       |       |       |                |       |       |       |       |       |                |       |       |       |       |       |                |       |       |       |       |       |                 |       |       |       |       |       |
|----------------|-------|-------|-------|-------|-------|----------------|-------|-------|-------|-------|-------|----------------|-------|-------|-------|-------|-------|----------------|-------|-------|-------|-------|-------|-----------------|-------|-------|-------|-------|-------|
| 2              | 0.036 | 0.001 | 0.002 | 2     | 0.000 | 0.000          | 0.000 | 2     | 0.007 | 0.000 | 0.017 | 2              | 0.000 | 0.004 | 0.017 | 2     | 0.000 | 0.000          | 0.000 |       |       |       |       |                 |       |       |       |       |       |
| 3              | 0.075 | 0.109 | 3     | 0.002 | 0.004 | 3              | 0.018 | 0.779 | 3     | 0.148 | 0.706 | 3              | 0.000 | 0.000 | 0.000 | 3     | 0.000 | 0.000          | 0.001 |       |       |       |       |                 |       |       |       |       |       |
| 4              | 0.003 | 4     | 0.000 | 4     | 0.028 | 4              | 0.034 | 4     | 0.026 | 5     | 5     | 5              | 5     | 5     | 5     | 5     | 5     | 5              | 5     |       |       |       |       |                 |       |       |       |       |       |
| 5              | 5     | 5     | 5     | 5     | 5     | 5              | 5     | 5     | 5     | 5     | 5     | 5              | 5     | 5     | 5     | 5     | 5     | 5              | 5     |       |       |       |       |                 |       |       |       |       |       |
| S <sub>6</sub> | 1     | 2     | 3     | 4     | 5     | S <sub>7</sub> | 1     | 2     | 3     | 4     | 5     | S <sub>8</sub> | 1     | 2     | 3     | 4     | 5     | S <sub>9</sub> | 1     | 2     | 3     | 4     | 5     | S <sub>10</sub> | 1     | 2     | 3     | 4     | 5     |
| 1              | 0.391 | 0.064 | 0.000 | 0.000 | 1     | 0.446          | 0.084 | 0.001 | 0.000 | 1     | 0.000 | 0.000          | 0.000 | 0.000 | 1     | 0.000 | 0.000 | 0.000          | 0.000 | 1     | 0.000 | 0.004 | 0.000 | 0.000           | 0.000 | 0.000 | 0.000 | 0.000 |       |
| 2              | 0.002 | 0.000 | 0.000 | 2     | 0.002 | 0.000          | 0.000 | 2     | 0.008 | 0.000 | 0.000 | 2              | 0.012 | 0.000 | 0.016 | 2     | 0.170 | 0.009          | 0.000 | 2     | 0.000 | 0.000 | 0.000 | 0.000           | 0.000 | 0.000 | 0.000 | 0.000 |       |
| 3              | 0.000 | 0.000 | 3     | 0.000 | 0.000 | 3              | 0.010 | 0.001 | 3     | 0.047 | 0.762 | 3              | 0.016 | 0.166 | 3     | 0.000 | 0.000 | 0.000          | 3     | 0.016 | 0.166 | 3     | 0.000 | 0.000           | 0.000 | 0.000 | 0.000 | 0.000 |       |
| 4              | 0.000 | 4     | 0.000 | 4     | 0.000 | 4              | 0.000 | 4     | 0.000 | 4     | 0.032 | 4              | 0.009 | 4     | 0.000 | 0.000 | 0.000 | 4              | 0.000 | 0.000 | 4     | 0.000 | 0.000 | 0.000           | 0.000 | 0.000 | 0.000 | 0.000 |       |
| 5              | 5     | 5     | 5     | 5     | 5     | 5              | 5     | 5     | 5     | 5     | 5     | 5              | 5     | 5     | 5     | 5     | 5     | 5              | 5     | 5     | 5     | 5     | 5     | 5               | 5     | 5     | 5     | 5     |       |
| T <sub>1</sub> | 1     | 2     | 3     | 4     | 5     | T <sub>2</sub> | 1     | 2     | 3     | 4     | 5     | T <sub>3</sub> | 1     | 2     | 3     | 4     | 5     | T <sub>4</sub> | 1     | 2     | 3     | 4     | 5     | T <sub>5</sub>  | 1     | 2     | 3     | 4     | 5     |
| 1              | 0.000 | 0.000 | 0.000 | 0.000 | 1     | 0.060          | 0.883 | 0.022 | 0.002 | 1     | 0.000 | 0.000          | 0.000 | 0.001 | 1     | 0.000 | 0.000 | 0.000          | 0.000 | 1     | 0.005 | 0.001 | 0.000 | 0.000           | 0.000 | 0.000 | 0.000 | 0.000 |       |
| 2              | 0.017 | 0.000 | 0.000 | 2     | 0.023 | 0.000          | 0.000 | 2     | 0.000 | 0.002 | 0.020 | 2              | 0.012 | 0.000 | 0.000 | 2     | 0.000 | 0.000          | 0.000 | 2     | 0.000 | 0.000 | 0.000 | 0.000           | 0.000 | 0.000 | 0.000 | 0.000 | 0.000 |
| 3              | 0.019 | 0.004 | 3     | 0.000 | 0.000 | 3              | 0.068 | 0.827 | 3     | 0.012 | 0.001 | 3              | 0.000 | 0.000 | 3     | 0.000 | 0.000 | 0.000          | 3     | 0.000 | 0.000 | 0.000 | 0.000 | 0.000           | 0.000 | 0.000 | 0.000 | 0.000 |       |
| 4              | 0.000 | 4     | 0.000 | 4     | 0.000 | 4              | 0.048 | 4     | 0.000 | 4     | 0.000 | 4              | 0.000 | 4     | 0.000 | 4     | 0.000 | 0.000          | 4     | 0.000 | 0.000 | 4     | 0.000 | 0.000           | 4     | 0.000 | 0.000 | 0.000 | 0.000 |
| 5              | 5     | 5     | 5     | 5     | 5     | 5              | 5     | 5     | 5     | 5     | 5     | 5              | 5     | 5     | 5     | 5     | 5     | 5              | 5     | 5     | 5     | 5     | 5     | 5               | 5     | 5     | 5     | 5     | 5     |
| T <sub>6</sub> | 1     | 2     | 3     | 4     | 5     | T <sub>7</sub> | 1     | 2     | 3     | 4     | 5     | T <sub>8</sub> | 1     | 2     | 3     | 4     | 5     | T <sub>9</sub> | 1     | 2     | 3     | 4     | 5     | T <sub>10</sub> | 1     | 2     | 3     | 4     | 5     |
| 1              | 0.000 | 0.000 | 0.000 | 0.000 | 1     | 0.000          | 0.000 | 0.000 | 0.000 | 1     | 0.000 | 0.000          | 0.000 | 0.000 | 1     | 0.000 | 0.000 | 0.000          | 0.000 | 1     | 0.000 | 0.000 | 0.000 | 0.000           | 1     | 0.000 | 0.000 | 0.000 | 0.000 |
| 2              | 0.001 | 0.000 | 0.000 | 2     | 0.000 | 0.000          | 0.001 | 2     | 0.005 | 0.003 | 0.008 | 2              | 0.000 | 0.000 | 0.000 | 2     | 0.000 | 0.000          | 0.000 | 2     | 0.000 | 0.000 | 0.000 | 2               | 0.000 | 0.000 | 0.000 | 0.000 | 0.000 |
| 3              | 0.005 | 0.000 | 3     | 0.000 | 0.001 | 3              | 0.191 | 0.386 | 3     | 0.000 | 0.004 | 3              | 0.000 | 0.004 | 3     | 0.000 | 0.000 | 0.000          | 3     | 0.000 | 0.000 | 0.000 | 3     | 0.000           | 0.000 | 0.000 | 0.000 | 0.000 | 0.000 |
| 4              | 0.000 | 4     | 0.025 | 4     | 0.092 | 4              | 0.011 | 4     | 0.001 | 4     | 0.001 | 4              | 0.001 | 4     | 0.001 | 4     | 0.001 | 0.001          | 4     | 0.001 | 0.001 | 4     | 0.001 | 4               | 0.001 | 0.001 | 0.001 | 0.001 | 0.001 |
| 5              | 5     | 5     | 5     | 5     | 5     | 5              | 5     | 5     | 5     | 5     | 5     | 5              | 5     | 5     | 5     | 5     | 5     | 5              | 5     | 5     | 5     | 5     | 5     | 5               | 5     | 5     | 5     | 5     | 5     |

X<sub>1</sub>.NZ-D<sub>7</sub>

|                |       |       |       |       |       |                |       |       |       |       |       |                |       |       |       |       |       |                |       |       |       |       |       |                 |       |       |       |       |       |
|----------------|-------|-------|-------|-------|-------|----------------|-------|-------|-------|-------|-------|----------------|-------|-------|-------|-------|-------|----------------|-------|-------|-------|-------|-------|-----------------|-------|-------|-------|-------|-------|
| S <sub>1</sub> | 1     | 2     | 3     | 4     | 5     | S <sub>2</sub> | 1     | 2     | 3     | 4     | 5     | S <sub>3</sub> | 1     | 2     | 3     | 4     | 5     | S <sub>4</sub> | 1     | 2     | 3     | 4     | 5     | S <sub>5</sub>  | 1     | 2     | 3     | 4     | 5     |
| 1              | 0.000 | 0.004 | 0.000 | 0.000 | 1     | 0.060          | 0.879 | 0.021 | 0.002 | 1     | 0.000 | 0.000          | 0.000 | 0.000 | 1     | 0.000 | 0.000 | 0.000          | 0.001 | 1     | 0.210 | 0.026 | 0.000 | 0.000           | 1     | 0.000 | 0.000 | 0.000 | 0.000 |
| 2              | 0.035 | 0.001 | 0.001 | 2     | 0.023 | 0.001          | 0.000 | 2     | 0.006 | 0.002 | 0.014 | 2              | 0.000 | 0.000 | 0.021 | 2     | 0.000 | 0.000          | 0.021 | 2     | 0.000 | 0.000 | 0.000 | 2               | 0.000 | 0.000 | 0.000 | 0.000 | 0.000 |
| 3              | 0.091 | 0.098 | 3     | 0.000 | 0.001 | 3              | 0.083 | 0.657 | 3     | 0.001 | 0.915 | 3              | 0.000 | 0.000 | 0.000 | 3     | 0.001 | 0.915          | 3     | 0.000 | 0.000 | 0.000 | 3     | 0.000           | 0.000 | 0.000 | 0.000 | 0.000 |       |
| 4              | 0.002 | 4     | 0.000 | 4     | 0.029 | 4              | 0.043 | 4     | 0.000 | 4     | 0.000 | 4              | 0.000 | 4     | 0.000 | 4     | 0.000 | 0.000          | 4     | 0.000 | 0.000 | 4     | 0.000 | 4               | 0.000 | 0.000 | 0.000 | 0.000 | 0.000 |
| 5              | 5     | 5     | 5     | 5     | 5     | 5              | 5     | 5     | 5     | 5     | 5     | 5              | 5     | 5     | 5     | 5     | 5     | 5              | 5     | 5     | 5     | 5     | 5     | 5               | 5     | 5     | 5     | 5     | 5     |
| S <sub>6</sub> | 1     | 2     | 3     | 4     | 5     | S <sub>7</sub> | 1     | 2     | 3     | 4     | 5     | S <sub>8</sub> | 1     | 2     | 3     | 4     | 5     | S <sub>9</sub> | 1     | 2     | 3     | 4     | 5     | S <sub>10</sub> | 1     | 2     | 3     | 4     | 5     |
| 1              | 0.625 | 0.117 | 0.000 | 0.000 | 1     | 0.000          | 0.000 | 0.000 | 0.000 | 1     | 0.000 | 0.000          | 0.000 | 0.000 | 1     | 0.000 | 0.000 | 0.000          | 0.000 | 1     | 0.404 | 0.012 | 0.000 | 0.000           | 1     | 0.000 | 0.000 | 0.000 | 0.000 |
| 2              | 0.004 | 0.000 | 0.000 | 2     | 0.007 | 0.000          | 0.000 | 2     | 0.000 | 0.000 | 0.000 | 2              | 0.148 | 0.002 | 0.000 | 2     | 0.000 | 0.000          | 0.000 | 2     | 0.000 | 0.000 | 0.000 | 2               | 0.000 | 0.000 | 0.000 | 0.000 | 0.000 |

|                                   |   |       |       |       |       |                |   |       |       |       |       |                |   |       |       |       |       |                |   |       |       |       |       |                 |   |       |       |       |       |
|-----------------------------------|---|-------|-------|-------|-------|----------------|---|-------|-------|-------|-------|----------------|---|-------|-------|-------|-------|----------------|---|-------|-------|-------|-------|-----------------|---|-------|-------|-------|-------|
| 3                                 |   |       | 0.000 | 0.000 | 3     |                |   |       | 0.008 | 0.002 | 3     |                |   |       | 0.001 | 0.006 | 3     |                |   |       | 0.091 | 0.027 | 3     |                 |   |       | 0.000 | 0.000 |       |
| 4                                 |   |       |       | 0.000 | 4     |                |   |       |       | 0.000 | 4     |                |   |       |       | 0.055 | 4     |                |   |       |       | 0.000 | 4     |                 |   |       |       | 0.000 |       |
| 5                                 |   |       |       |       | 5     |                |   |       |       |       | 5     |                |   |       |       |       | 5     |                |   |       |       |       | 5     |                 |   |       |       |       |       |
| T <sub>1</sub>                    | 1 | 2     | 3     | 4     | 5     | T <sub>2</sub> | 1 | 2     | 3     | 4     | 5     | T <sub>3</sub> | 1 | 2     | 3     | 4     | 5     | T <sub>4</sub> | 1 | 2     | 3     | 4     | 5     | T <sub>5</sub>  | 1 | 2     | 3     | 4     | 5     |
| 1                                 |   | 0.000 | 0.000 | 0.000 | 0.000 | 1              |   | 0.060 | 0.883 | 0.022 | 0.002 | 1              |   | 0.000 | 0.000 | 0.000 | 0.000 | 1              |   | 0.000 | 0.001 | 0.000 | 0.000 | 1               |   | 0.003 | 0.000 | 0.000 | 0.000 |
| 2                                 |   |       | 0.016 | 0.000 | 0.000 | 2              |   |       | 0.000 | 0.000 | 0.000 | 2              |   |       | 0.000 | 0.003 | 0.013 | 2              |   |       | 0.011 | 0.000 | 0.000 | 2               |   |       | 0.000 | 0.000 | 0.000 |
| 3                                 |   |       |       | 0.020 | 0.005 | 3              |   |       |       | 0.000 | 0.000 | 3              |   |       |       | 0.164 | 0.627 | 3              |   |       |       | 0.008 | 0.017 | 3               |   |       |       | 0.000 | 0.000 |
| 4                                 |   |       |       |       | 0.000 | 4              |   |       |       |       | 0.000 | 4              |   |       |       |       | 0.067 | 4              |   |       |       |       | 0.000 | 4               |   |       |       |       | 0.000 |
| 5                                 |   |       |       |       |       | 5              |   |       |       |       |       | 5              |   |       |       |       |       | 5              |   |       |       |       |       | 5               |   |       |       |       |       |
| T <sub>6</sub>                    | 1 | 2     | 3     | 4     | 5     | T <sub>7</sub> | 1 | 2     | 3     | 4     | 5     | T <sub>8</sub> | 1 | 2     | 3     | 4     | 5     | T <sub>9</sub> | 1 | 2     | 3     | 4     | 5     | T <sub>10</sub> | 1 | 2     | 3     | 4     | 5     |
| 1                                 |   | 0.000 | 0.000 | 0.000 | 0.000 | 1              |   | 0.000 | 0.000 | 0.000 | 0.000 | 1              |   | 0.000 | 0.000 | 0.000 | 0.000 | 1              |   | 0.000 | 0.001 | 0.000 | 0.000 | 1               |   | 0.000 | 0.000 | 0.000 | 0.001 |
| 2                                 |   |       | 0.004 | 0.000 | 0.000 | 2              |   |       | 0.000 | 0.000 | 0.000 | 2              |   |       | 0.000 | 0.000 | 0.000 | 2              |   |       | 0.039 | 0.002 | 0.023 | 2               |   |       | 0.063 | 0.004 | 0.023 |
| 3                                 |   |       |       | 0.003 | 0.002 | 3              |   |       |       | 0.000 | 0.002 | 3              |   |       |       | 0.000 | 0.036 | 3              |   |       |       | 0.024 | 0.563 | 3               |   |       |       | 0.023 | 0.388 |
| 4                                 |   |       |       |       | 0.000 | 4              |   |       |       |       | 0.043 | 4              |   |       |       |       | 0.012 | 4              |   |       |       |       | 0.047 | 4               |   |       |       |       | 0.038 |
| 5                                 |   |       |       |       |       | 5              |   |       |       |       |       | 5              |   |       |       |       |       | 5              |   |       |       |       |       | 5               |   |       |       |       |       |
| X <sub>1</sub> -NZ-D <sub>8</sub> |   |       |       |       |       |                |   |       |       |       |       |                |   |       |       |       |       |                |   |       |       |       |       |                 |   |       |       |       |       |
| S <sub>1</sub>                    | 1 | 2     | 3     | 4     | 5     | S <sub>2</sub> | 1 | 2     | 3     | 4     | 5     | S <sub>3</sub> | 1 | 2     | 3     | 4     | 5     | S <sub>4</sub> | 1 | 2     | 3     | 4     | 5     | S <sub>5</sub>  | 1 | 2     | 3     | 4     | 5     |
| 1                                 |   | 0.000 | 0.002 | 0.000 | 0.000 | 1              |   | 0.063 | 0.877 | 0.023 | 0.004 | 1              |   | 0.000 | 0.000 | 0.000 | 0.001 | 1              |   | 0.082 | 0.003 | 0.000 | 0.000 | 1               |   | 0.747 | 0.142 | 0.000 | 0.000 |
| 2                                 |   |       | 0.038 | 0.001 | 0.001 | 2              |   |       | 0.022 | 0.001 | 0.000 | 2              |   |       | 0.004 | 0.002 | 0.016 | 2              |   |       |       | 0.000 | 0.000 | 2               |   |       | 0.005 | 0.000 | 0.000 |
| 3                                 |   |       |       | 0.088 | 0.046 | 3              |   |       |       | 0.000 | 0.000 | 3              |   |       |       | 0.107 | 0.687 | 3              |   |       |       | 0.000 | 0.000 | 3               |   |       |       | 0.000 | 0.000 |
| 4                                 |   |       |       |       | 0.000 | 4              |   |       |       |       | 0.000 | 4              |   |       |       |       | 0.030 | 4              |   |       |       |       | 0.000 | 4               |   |       |       |       | 0.000 |
| 5                                 |   |       |       |       |       | 5              |   |       |       |       |       | 5              |   |       |       |       |       | 5              |   |       |       |       |       | 5               |   |       |       |       |       |
| S <sub>6</sub>                    | 1 | 2     | 3     | 4     | 5     | S <sub>7</sub> | 1 | 2     | 3     | 4     | 5     | S <sub>8</sub> | 1 | 2     | 3     | 4     | 5     | S <sub>9</sub> | 1 | 2     | 3     | 4     | 5     | S <sub>10</sub> | 1 | 2     | 3     | 4     | 5     |
| 1                                 |   | 0.000 | 0.000 | 0.000 | 0.000 | 1              |   | 0.000 | 0.000 | 0.000 | 0.001 | 1              |   | 0.000 | 0.001 | 0.000 | 0.000 | 1              |   | 0.000 | 0.002 | 0.000 | 0.000 | 1               |   | 0.385 | 0.009 | 0.001 | 0.001 |
| 2                                 |   |       | 0.006 | 0.000 | 0.000 | 2              |   |       | 0.004 | 0.003 | 0.004 | 2              |   |       | 0.033 | 0.001 | 0.001 | 2              |   |       | 0.166 | 0.001 | 0.002 | 2               |   |       | 0.000 | 0.000 | 0.000 |
| 3                                 |   |       |       | 0.014 | 0.002 | 3              |   |       |       | 0.004 | 0.070 | 3              |   |       |       | 0.171 | 0.208 | 3              |   |       |       | 0.325 | 0.186 | 3               |   |       |       | 0.000 | 0.000 |
| 4                                 |   |       |       |       | 0.001 | 4              |   |       |       |       | 0.049 | 4              |   |       |       |       | 0.011 | 4              |   |       |       |       | 0.003 | 4               |   |       |       |       | 0.000 |
| 5                                 |   |       |       |       |       | 5              |   |       |       |       |       | 5              |   |       |       |       |       | 5              |   |       |       |       |       | 5               |   |       |       |       |       |
| T <sub>1</sub>                    | 1 | 2     | 3     | 4     | 5     | T <sub>2</sub> | 1 | 2     | 3     | 4     | 5     | T <sub>3</sub> | 1 | 2     | 3     | 4     | 5     | T <sub>4</sub> | 1 | 2     | 3     | 4     | 5     | T <sub>5</sub>  | 1 | 2     | 3     | 4     | 5     |
| 1                                 |   | 0.000 | 0.000 | 0.000 | 0.000 | 1              |   | 0.063 | 0.876 | 0.023 | 0.004 | 1              |   | 0.000 | 0.000 | 0.000 | 0.000 | 1              |   | 0.000 | 0.000 | 0.000 | 0.000 | 1               |   | 0.003 | 0.000 | 0.000 | 0.000 |
| 2                                 |   |       | 0.015 | 0.000 | 0.000 | 2              |   |       | 0.023 | 0.001 | 0.000 | 2              |   |       | 0.006 | 0.001 | 0.003 | 2              |   |       | 0.005 | 0.002 | 0.006 | 2               |   |       | 0.000 | 0.000 | 0.000 |
| 3                                 |   |       |       | 0.025 | 0.006 | 3              |   |       |       | 0.000 | 0.000 | 3              |   |       |       | 0.031 | 0.147 | 3              |   |       |       | 0.059 | 0.241 | 3               |   |       |       | 0.000 | 0.000 |

|   |  |  |  |       |   |  |  |  |  |       |   |  |  |  |  |       |   |  |  |  |  |       |   |  |  |  |  |       |
|---|--|--|--|-------|---|--|--|--|--|-------|---|--|--|--|--|-------|---|--|--|--|--|-------|---|--|--|--|--|-------|
| 4 |  |  |  | 0.000 | 4 |  |  |  |  | 0.000 | 4 |  |  |  |  | 0.008 | 4 |  |  |  |  | 0.029 | 4 |  |  |  |  | 0.000 |
| 5 |  |  |  |       | 5 |  |  |  |  |       | 5 |  |  |  |  |       | 5 |  |  |  |  |       | 5 |  |  |  |  |       |

| T <sub>6</sub> | 1 | 2     | 3     | 4     | 5     | T <sub>7</sub> | 1 | 2     | 3     | 4     | 5     | T <sub>8</sub> | 1 | 2     | 3     | 4     | 5     | T <sub>9</sub> | 1 | 2     | 3     | 4     | 5     | T <sub>10</sub> | 1 | 2     | 3     | 4     | 5     |
|----------------|---|-------|-------|-------|-------|----------------|---|-------|-------|-------|-------|----------------|---|-------|-------|-------|-------|----------------|---|-------|-------|-------|-------|-----------------|---|-------|-------|-------|-------|
| 1              |   | 0.000 | 0.001 | 0.000 | 0.000 | 1              |   | 0.000 | 0.000 | 0.000 | 0.000 | 1              |   | 0.000 | 0.000 | 0.000 | 0.000 | 1              |   | 0.000 | 0.000 | 0.000 | 0.000 | 1               |   | 0.039 | 0.000 | 0.000 | 0.000 |
| 2              |   |       | 0.004 | 0.000 | 0.000 | 2              |   |       | 0.000 | 0.000 | 0.005 | 2              |   |       | 0.000 | 0.000 | 0.000 | 2              |   |       | 0.071 | 0.001 | 0.009 | 2               |   |       | 0.000 | 0.000 | 0.000 |
| 3              |   |       |       | 0.002 | 0.004 | 3              |   |       |       | 0.060 | 0.321 | 3              |   |       |       | 0.000 | 0.001 | 3              |   |       |       | 0.055 | 0.126 | 3               |   |       |       | 0.000 | 0.000 |
| 4              |   |       |       |       | 0.000 | 4              |   |       |       |       | 0.002 | 4              |   |       |       |       | 0.010 | 4              |   |       |       |       | 0.008 | 4               |   |       |       |       | 0.000 |
| 5              |   |       |       |       |       | 5              |   |       |       |       |       | 5              |   |       |       |       |       | 5              |   |       |       |       |       | 5               |   |       |       |       |       |

X<sub>1</sub>-NZ-D<sub>9</sub>

| S <sub>1</sub> | 1 | 2     | 3     | 4     | 5     | S <sub>2</sub> | 1 | 2     | 3     | 4     | 5     | S <sub>3</sub> | 1 | 2     | 3     | 4     | 5     | S <sub>4</sub> | 1 | 2     | 3     | 4     | 5     | S <sub>5</sub> | 1 | 2     | 3     | 4     | 5     |
|----------------|---|-------|-------|-------|-------|----------------|---|-------|-------|-------|-------|----------------|---|-------|-------|-------|-------|----------------|---|-------|-------|-------|-------|----------------|---|-------|-------|-------|-------|
| 1              |   | 0.011 | 0.304 | 0.007 | 0.001 | 1              |   | 0.031 | 0.599 | 0.014 | 0.001 | 1              |   | 0.000 | 0.000 | 0.000 | 0.001 | 1              |   | 0.000 | 0.000 | 0.000 | 0.001 | 1              |   | 0.630 | 0.119 | 0.001 | 0.000 |
| 2              |   |       | 0.033 | 0.001 | 0.000 | 2              |   |       | 0.020 | 0.001 | 0.000 | 2              |   |       | 0.001 | 0.002 | 0.019 | 2              |   |       | 0.000 | 0.003 | 0.019 | 2              |   |       | 0.004 | 0.000 | 0.000 |
| 3              |   |       |       | 0.037 | 0.016 | 3              |   |       |       | 0.019 | 0.009 | 3              |   |       |       | 0.069 | 0.813 | 3              |   |       |       | 0.112 | 0.770 | 3              |   |       |       | 0.000 | 0.000 |
| 4              |   |       |       |       | 0.000 | 4              |   |       |       |       | 0.000 | 4              |   |       |       |       | 0.032 | 4              |   |       |       |       | 0.032 | 4              |   |       |       |       | 0.000 |
| 5              |   |       |       |       |       | 5              |   |       |       |       |       | 5              |   |       |       |       |       | 5              |   |       |       |       |       | 5              |   |       |       |       |       |

| S <sub>6</sub> | 1 | 2     | 3     | 4     | 5     | S <sub>7</sub> | 1 | 2     | 3     | 4     | 5     | S <sub>8</sub> | 1 | 2     | 3     | 4     | 5     | S <sub>9</sub> | 1 | 2     | 3     | 4     | 5     | S <sub>10</sub> | 1 | 2     | 3     | 4     | 5     |
|----------------|---|-------|-------|-------|-------|----------------|---|-------|-------|-------|-------|----------------|---|-------|-------|-------|-------|----------------|---|-------|-------|-------|-------|-----------------|---|-------|-------|-------|-------|
| 1              |   | 0.201 | 0.032 | 0.000 | 0.000 | 1              |   | 0.000 | 0.000 | 0.000 | 0.001 | 1              |   | 0.000 | 0.000 | 0.000 | 0.000 | 1              |   | 0.000 | 0.003 | 0.000 | 0.000 | 1               |   | 0.000 | 0.000 | 0.000 | 0.001 |
| 2              |   |       | 0.001 | 0.000 | 0.000 | 2              |   |       | 0.000 | 0.000 | 0.023 | 2              |   |       | 0.009 | 0.000 | 0.000 | 2              |   |       | 0.157 | 0.002 | 0.002 | 2               |   |       | 0.033 | 0.001 | 0.007 |
| 3              |   |       |       | 0.000 | 0.000 | 3              |   |       |       | 0.000 | 0.943 | 3              |   |       |       | 0.006 | 0.000 | 3              |   |       |       | 0.039 | 0.197 | 3               |   |       |       | 0.007 | 0.643 |
| 4              |   |       |       |       | 0.000 | 4              |   |       |       |       | 0.027 | 4              |   |       |       |       | 0.000 | 4              |   |       |       |       | 0.003 | 4               |   |       |       |       | 0.003 |
| 5              |   |       |       |       |       | 5              |   |       |       |       |       | 5              |   |       |       |       |       | 5              |   |       |       |       |       | 5               |   |       |       |       |       |

| T <sub>1</sub> | 1 | 2     | 3     | 4     | 5     | T <sub>2</sub> | 1 | 2     | 3     | 4     | 5     | T <sub>3</sub> | 1 | 2     | 3     | 4     | 5     | T <sub>4</sub> | 1 | 2     | 3     | 4     | 5     | T <sub>5</sub> | 1 | 2     | 3     | 4     | 5     |
|----------------|---|-------|-------|-------|-------|----------------|---|-------|-------|-------|-------|----------------|---|-------|-------|-------|-------|----------------|---|-------|-------|-------|-------|----------------|---|-------|-------|-------|-------|
| 1              |   | 0.000 | 0.000 | 0.000 | 0.000 | 1              |   | 0.063 | 0.881 | 0.021 | 0.002 | 1              |   | 0.000 | 0.000 | 0.000 | 0.000 | 1              |   | 0.003 | 0.000 | 0.000 | 0.000 | 1              |   | 0.000 | 0.000 | 0.000 | 0.001 |
| 2              |   |       | 0.019 | 0.000 | 0.000 | 2              |   |       | 0.023 | 0.001 | 0.000 | 2              |   |       | 0.011 | 0.000 | 0.000 | 2              |   |       | 0.000 | 0.000 | 0.000 | 2              |   |       | 0.000 | 0.004 | 0.017 |
| 3              |   |       |       | 0.015 | 0.003 | 3              |   |       |       | 0.000 | 0.000 | 3              |   |       |       | 0.011 | 0.001 | 3              |   |       |       | 0.000 | 0.000 | 3              |   |       |       | 0.141 | 0.675 |
| 4              |   |       |       |       | 0.000 | 4              |   |       |       |       | 0.000 | 4              |   |       |       |       | 0.000 | 4              |   |       |       |       | 0.000 | 4              |   |       |       |       | 0.069 |
| 5              |   |       |       |       |       | 5              |   |       |       |       |       | 5              |   |       |       |       |       | 5              |   |       |       |       |       | 5              |   |       |       |       |       |

| T <sub>6</sub> | 1 | 2     | 3     | 4     | 5     | T <sub>7</sub> | 1 | 2     | 3     | 4     | 5     | T <sub>8</sub> | 1 | 2     | 3     | 4     | 5     | T <sub>9</sub> | 1 | 2     | 3     | 4     | 5     | T <sub>10</sub> | 1 | 2     | 3     | 4     | 5     |
|----------------|---|-------|-------|-------|-------|----------------|---|-------|-------|-------|-------|----------------|---|-------|-------|-------|-------|----------------|---|-------|-------|-------|-------|-----------------|---|-------|-------|-------|-------|
| 1              |   | 0.000 | 0.000 | 0.000 | 0.000 | 1              |   | 0.000 | 0.000 | 0.000 | 0.000 | 1              |   | 0.000 | 0.000 | 0.000 | 0.001 | 1              |   | 0.000 | 0.000 | 0.000 | 0.000 | 1               |   | 0.000 | 0.000 | 0.000 | 0.000 |
| 2              |   |       | 0.000 | 0.000 | 0.000 | 2              |   |       | 0.000 | 0.000 | 0.000 | 2              |   |       | 0.001 | 0.000 | 0.005 | 2              |   |       | 0.022 | 0.001 | 0.011 | 2               |   |       | 0.000 | 0.000 | 0.000 |
| 3              |   |       |       | 0.002 | 0.017 | 3              |   |       |       | 0.000 | 0.001 | 3              |   |       |       | 0.003 | 0.071 | 3              |   |       |       | 0.079 | 0.378 | 3               |   |       |       | 0.000 | 0.000 |
| 4              |   |       |       |       | 0.000 | 4              |   |       |       |       | 0.032 | 4              |   |       |       |       | 0.015 | 4              |   |       |       |       | 0.049 | 4               |   |       |       |       | 0.001 |

| 5                                      |   |       |       |       | 5     |                |   |       |       | 5     |       |                |   |       | 5     |       |       |                |   | 5     |       |       |       |                 |   |       |       |       |       |
|----------------------------------------|---|-------|-------|-------|-------|----------------|---|-------|-------|-------|-------|----------------|---|-------|-------|-------|-------|----------------|---|-------|-------|-------|-------|-----------------|---|-------|-------|-------|-------|
| <b>X<sub>1</sub>-NZ-D<sub>10</sub></b> |   |       |       |       |       |                |   |       |       |       |       |                |   |       |       |       |       |                |   |       |       |       |       |                 |   |       |       |       |       |
| S <sub>1</sub>                         | 1 | 2     | 3     | 4     | 5     | S <sub>2</sub> | 1 | 2     | 3     | 4     | 5     | S <sub>3</sub> | 1 | 2     | 3     | 4     | 5     | S <sub>4</sub> | 1 | 2     | 3     | 4     | 5     | S <sub>5</sub>  | 1 | 2     | 3     | 4     | 5     |
| 1                                      |   | 0.034 | 0.638 | 0.014 | 0.001 | 1              |   | 0.009 | 0.264 | 0.006 | 0.001 | 1              |   | 0.000 | 0.000 | 0.000 | 0.001 | 1              |   | 0.000 | 0.000 | 0.000 | 0.000 | 1               |   | 0.640 | 0.119 | 0.000 | 0.000 |
| 2                                      |   |       | 0.025 | 0.000 | 0.000 | 2              |   |       | 0.029 | 0.000 | 0.000 | 2              |   |       | 0.002 | 0.001 | 0.020 | 2              |   |       | 0.000 | 0.000 | 0.023 | 2               |   |       | 0.004 | 0.000 | 0.000 |
| 3                                      |   |       |       | 0.014 | 0.006 | 3              |   |       |       | 0.036 | 0.016 | 3              |   |       |       | 0.053 | 0.836 | 3              |   |       |       | 0.001 | 0.938 | 3               |   |       |       | 0.000 | 0.000 |
| 4                                      |   |       |       |       | 0.000 | 4              |   |       |       |       | 0.000 | 4              |   |       |       |       | 0.034 | 4              |   |       |       |       | 0.031 | 4               |   |       |       |       | 0.000 |
| 5                                      |   |       |       |       |       | 5              |   |       |       |       |       | 5              |   |       |       |       |       | 5              |   |       |       |       |       | 5               |   |       |       |       |       |
| S <sub>6</sub>                         | 1 | 2     | 3     | 4     | 5     | S <sub>7</sub> | 1 | 2     | 3     | 4     | 5     | S <sub>8</sub> | 1 | 2     | 3     | 4     | 5     | S <sub>9</sub> | 1 | 2     | 3     | 4     | 5     | S <sub>10</sub> | 1 | 2     | 3     | 4     | 5     |
| 1                                      |   | 0.000 | 0.000 | 0.000 | 0.000 | 1              |   | 0.199 | 0.032 | 0.000 | 0.000 | 1              |   | 0.000 | 0.000 | 0.000 | 0.000 | 1              |   | 0.000 | 0.000 | 0.000 | 0.000 | 1               |   | 0.000 | 0.000 | 0.000 | 0.000 |
| 2                                      |   |       | 0.000 | 0.005 | 0.015 | 2              |   |       | 0.001 | 0.000 | 0.000 | 2              |   |       | 0.000 | 0.000 | 0.023 | 2              |   |       | 0.007 | 0.000 | 0.000 | 2               |   |       | 0.000 | 0.000 | 0.023 |
| 3                                      |   |       |       | 0.188 | 0.635 | 3              |   |       |       | 0.000 | 0.000 | 3              |   |       |       | 0.001 | 0.940 | 3              |   |       |       | 0.013 | 0.000 | 3               |   |       |       | 0.000 | 0.941 |
| 4                                      |   |       |       |       | 0.027 | 4              |   |       |       |       | 0.000 | 4              |   |       |       |       | 0.028 | 4              |   |       |       |       | 0.000 | 4               |   |       |       |       | 0.029 |
| 5                                      |   |       |       |       |       | 5              |   |       |       |       |       | 5              |   |       |       |       |       | 5              |   |       |       |       |       | 5               |   |       |       |       |       |
| T <sub>1</sub>                         | 1 | 2     | 3     | 4     | 5     | T <sub>2</sub> | 1 | 2     | 3     | 4     | 5     | T <sub>3</sub> | 1 | 2     | 3     | 4     | 5     | T <sub>4</sub> | 1 | 2     | 3     | 4     | 5     | T <sub>5</sub>  | 1 | 2     | 3     | 4     | 5     |
| 1                                      |   | 0.000 | 0.000 | 0.000 | 0.000 | 1              |   | 0.062 | 0.882 | 0.022 | 0.001 | 1              |   | 0.000 | 0.000 | 0.000 | 0.000 | 1              |   | 0.004 | 0.000 | 0.000 | 0.000 | 1               |   | 0.000 | 0.000 | 0.000 | 0.000 |
| 2                                      |   |       | 0.017 | 0.000 | 0.000 | 2              |   |       | 0.024 | 0.001 | 0.000 | 2              |   |       | 0.011 | 0.000 | 0.000 | 2              |   |       | 0.000 | 0.000 | 0.000 | 2               |   |       | 0.001 | 0.003 | 0.019 |
| 3                                      |   |       |       | 0.015 | 0.002 | 3              |   |       |       | 0.000 | 0.000 | 3              |   |       |       | 0.012 | 0.001 | 3              |   |       |       | 0.000 | 0.000 | 3               |   |       |       | 0.109 | 0.725 |
| 4                                      |   |       |       |       | 0.000 | 4              |   |       |       |       | 0.000 | 4              |   |       |       |       | 0.000 | 4              |   |       |       |       | 0.000 | 4               |   |       |       |       | 0.065 |
| 5                                      |   |       |       |       |       | 5              |   |       |       |       |       | 5              |   |       |       |       |       | 5              |   |       |       |       |       | 5               |   |       |       |       |       |
| T <sub>6</sub>                         | 1 | 2     | 3     | 4     | 5     | T <sub>7</sub> | 1 | 2     | 3     | 4     | 5     | T <sub>8</sub> | 1 | 2     | 3     | 4     | 5     | T <sub>9</sub> | 1 | 2     | 3     | 4     | 5     | T <sub>10</sub> | 1 | 2     | 3     | 4     | 5     |
| 1                                      |   | 0.000 | 0.001 | 0.000 | 0.000 | 1              |   | 0.000 | 0.000 | 0.000 | 0.000 | 1              |   | 0.000 | 0.000 | 0.000 | 0.000 | 1              |   | 0.000 | 0.000 | 0.000 | 0.000 | 1               |   | 0.000 | 0.001 | 0.000 | 0.000 |
| 2                                      |   |       | 0.001 | 0.000 | 0.000 | 2              |   |       | 0.000 | 0.000 | 0.000 | 2              |   |       | 0.000 | 0.000 | 0.021 | 2              |   |       | 0.000 | 0.000 | 0.003 | 2               |   |       | 0.063 | 0.004 | 0.012 |
| 3                                      |   |       |       | 0.000 | 0.021 | 3              |   |       |       | 0.000 | 0.004 | 3              |   |       |       | 0.002 | 0.828 | 3              |   |       |       | 0.000 | 0.120 | 3               |   |       |       | 0.070 | 0.165 |
| 4                                      |   |       |       |       | 0.000 | 4              |   |       |       |       | 0.031 | 4              |   |       |       |       | 0.030 | 4              |   |       |       |       | 0.000 | 4               |   |       |       |       | 0.025 |
| 5                                      |   |       |       |       |       | 5              |   |       |       |       |       | 5              |   |       |       |       |       | 5              |   |       |       |       |       | 5               |   |       |       |       |       |
| <b>X<sub>2</sub>-NZ-D<sub>1</sub></b>  |   |       |       |       |       |                |   |       |       |       |       |                |   |       |       |       |       |                |   |       |       |       |       |                 |   |       |       |       |       |
| S <sub>1</sub>                         | 1 | 2     | 3     | 4     | 5     | S <sub>2</sub> | 1 | 2     | 3     | 4     | 5     | S <sub>3</sub> | 1 | 2     | 3     | 4     | 5     | S <sub>4</sub> | 1 | 2     | 3     | 4     | 5     | S <sub>5</sub>  | 1 | 2     | 3     | 4     | 5     |
| 1                                      |   | 0.000 | 0.000 | 0.001 | 0.064 | 1              |   | 0.002 | 0.025 | 0.002 | 0.000 | 1              |   | 0.002 | 0.000 | 0.013 | 0.731 | 1              |   | 0.068 | 0.007 | 0.001 | 0.000 | 1               |   | 0.075 | 0.487 | 0.032 | 0.001 |
| 2                                      |   |       | 0.000 | 0.001 | 0.046 | 2              |   |       | 0.026 | 0.002 | 0.000 | 2              |   |       | 0.000 | 0.002 | 0.142 | 2              |   |       | 0.000 | 0.000 | 0.000 | 2               |   |       | 0.189 | 0.013 | 0.000 |
| 3                                      |   |       |       | 0.016 | 0.814 | 3              |   |       |       | 0.042 | 0.001 | 3              |   |       |       | 0.002 | 0.102 | 3              |   |       |       | 0.000 | 0.000 | 3               |   |       |       | 0.006 | 0.000 |
| 4                                      |   |       |       |       | 0.048 | 4              |   |       |       |       | 0.000 | 4              |   |       |       |       | 0.002 | 4              |   |       |       |       | 0.000 | 4               |   |       |       |       | 0.000 |

| 5              |   |       |       |       | 5     |                |   |       |       | 5     |       |                |   |       | 5     |       |       |                |   | 5     |       |       |       |                 |   |       |       |       |       |
|----------------|---|-------|-------|-------|-------|----------------|---|-------|-------|-------|-------|----------------|---|-------|-------|-------|-------|----------------|---|-------|-------|-------|-------|-----------------|---|-------|-------|-------|-------|
| S <sub>6</sub> | 1 | 2     | 3     | 4     | 5     | S <sub>7</sub> | 1 | 2     | 3     | 4     | 5     | S <sub>8</sub> | 1 | 2     | 3     | 4     | 5     | S <sub>9</sub> | 1 | 2     | 3     | 4     | 5     | S <sub>10</sub> | 1 | 2     | 3     | 4     | 5     |
| 1              |   | 0.000 | 0.000 | 0.000 | 0.000 | 1              |   | 0.000 | 0.000 | 0.000 | 0.015 | 1              |   | 0.000 | 0.000 | 0.014 | 0.822 | 1              |   | 0.000 | 0.002 | 0.001 | 0.065 | 1               |   | 0.000 | 0.014 | 0.000 | 0.006 |
| 2              |   |       | 0.000 | 0.000 | 0.000 | 2              |   |       | 0.000 | 0.000 | 0.004 | 2              |   |       | 0.000 | 0.002 | 0.119 | 2              |   |       | 0.001 | 0.001 | 0.046 | 2               |   |       | 0.015 | 0.000 | 0.001 |
| 3              |   |       |       | 0.000 | 0.017 | 3              |   |       |       | 0.004 | 0.136 | 3              |   |       |       | 0.000 | 0.021 | 3              |   |       |       | 0.009 | 0.786 | 3               |   |       |       | 0.010 | 0.024 |
| 4              |   |       |       |       | 0.181 | 4              |   |       |       |       | 0.620 | 4              |   |       |       |       | 0.015 | 4              |   |       |       |       | 0.056 | 4               |   |       |       |       | 0.000 |
| 5              |   |       |       |       |       | 5              |   |       |       |       |       | 5              |   |       |       |       |       | 5              |   |       |       |       |       | 5               |   |       |       |       |       |

| T <sub>1</sub> | 1 | 2     | 3     | 4     | 5     | T <sub>2</sub> | 1 | 2     | 3     | 4     | 5     | T <sub>3</sub> | 1 | 2     | 3     | 4     | 5     | T <sub>4</sub> | 1 | 2     | 3     | 4     | 5     | T <sub>5</sub> | 1 | 2     | 3     | 4     | 5     |
|----------------|---|-------|-------|-------|-------|----------------|---|-------|-------|-------|-------|----------------|---|-------|-------|-------|-------|----------------|---|-------|-------|-------|-------|----------------|---|-------|-------|-------|-------|
| 1              |   | 0.000 | 0.004 | 0.000 | 0.000 | 1              |   | 0.000 | 0.000 | 0.001 | 0.064 | 1              |   | 0.066 | 0.008 | 0.000 | 0.000 | 1              |   | 0.000 | 0.001 | 0.013 | 0.731 | 1              |   | 0.000 | 0.000 | 0.000 | 0.000 |
| 2              |   |       | 0.011 | 0.000 | 0.000 | 2              |   |       | 0.000 | 0.001 | 0.046 | 2              |   |       | 0.000 | 0.000 | 0.000 | 2              |   |       | 0.000 | 0.002 | 0.143 | 2              |   |       | 0.000 | 0.000 | 0.000 |
| 3              |   |       |       | 0.016 | 0.000 | 3              |   |       |       | 0.016 | 0.814 | 3              |   |       |       | 0.000 | 0.000 | 3              |   |       |       | 0.002 | 0.101 | 3              |   |       |       | 0.000 | 0.000 |
| 4              |   |       |       |       | 0.000 | 4              |   |       |       |       | 0.049 | 4              |   |       |       |       | 0.000 | 4              |   |       |       |       | 0.002 | 4              |   |       |       |       | 0.008 |
| 5              |   |       |       |       |       | 5              |   |       |       |       |       | 5              |   |       |       |       |       | 5              |   |       |       |       |       | 5              |   |       |       |       |       |

| T <sub>6</sub> | 1 | 2     | 3     | 4     | 5     | T <sub>7</sub> | 1 | 2     | 3     | 4     | 5     | T <sub>8</sub> | 1 | 2     | 3     | 4     | 5     | T <sub>9</sub> | 1 | 2     | 3     | 4     | 5     | T <sub>10</sub> | 1 | 2     | 3     | 4     | 5     |
|----------------|---|-------|-------|-------|-------|----------------|---|-------|-------|-------|-------|----------------|---|-------|-------|-------|-------|----------------|---|-------|-------|-------|-------|-----------------|---|-------|-------|-------|-------|
| 1              |   | 0.179 | 0.215 | 0.009 | 0.001 | 1              |   | 0.001 | 0.029 | 0.000 | 0.000 | 1              |   | 0.001 | 0.022 | 0.000 | 0.000 | 1              |   | 0.062 | 0.010 | 0.000 | 0.000 | 1               |   | 0.000 | 0.000 | 0.000 | 0.000 |
| 2              |   |       | 0.096 | 0.006 | 0.001 | 2              |   |       | 0.003 | 0.000 | 0.000 | 2              |   |       | 0.018 | 0.000 | 0.000 | 2              |   |       | 0.000 | 0.000 | 0.000 | 2               |   |       | 0.000 | 0.000 | 0.000 |
| 3              |   |       |       | 0.002 | 0.000 | 3              |   |       |       | 0.011 | 0.000 | 3              |   |       |       | 0.002 | 0.000 | 3              |   |       |       | 0.000 | 0.000 | 3               |   |       |       | 0.000 | 0.006 |
| 4              |   |       |       |       | 0.000 | 4              |   |       |       |       | 0.000 | 4              |   |       |       |       | 0.000 | 4              |   |       |       |       | 0.000 | 4               |   |       |       |       | 0.084 |
| 5              |   |       |       |       |       | 5              |   |       |       |       |       | 5              |   |       |       |       |       | 5              |   |       |       |       |       | 5               |   |       |       |       |       |

X<sub>2</sub>-NZ-D<sub>2</sub>

| S <sub>1</sub> | 1 | 2     | 3     | 4     | 5     | S <sub>2</sub> | 1 | 2     | 3     | 4     | 5     | S <sub>3</sub> | 1 | 2     | 3     | 4     | 5     | S <sub>4</sub> | 1 | 2     | 3     | 4     | 5     | S <sub>5</sub> | 1 | 2     | 3     | 4     | 5     |
|----------------|---|-------|-------|-------|-------|----------------|---|-------|-------|-------|-------|----------------|---|-------|-------|-------|-------|----------------|---|-------|-------|-------|-------|----------------|---|-------|-------|-------|-------|
| 1              |   | 0.000 | 0.000 | 0.001 | 0.071 | 1              |   | 0.002 | 0.023 | 0.002 | 0.000 | 1              |   | 0.000 | 0.000 | 0.010 | 0.730 | 1              |   | 0.065 | 0.007 | 0.000 | 0.000 | 1              |   | 0.000 | 0.000 | 0.000 | 0.102 |
| 2              |   |       | 0.000 | 0.001 | 0.049 | 2              |   |       | 0.026 | 0.001 | 0.000 | 2              |   |       | 0.000 | 0.002 | 0.139 | 2              |   |       | 0.000 | 0.000 | 0.000 | 2              |   |       | 0.000 | 0.000 | 0.058 |
| 3              |   |       |       | 0.013 | 0.815 | 3              |   |       |       | 0.040 | 0.002 | 3              |   |       |       | 0.001 | 0.108 | 3              |   |       |       | 0.000 | 0.000 | 3              |   |       |       | 0.001 | 0.805 |
| 4              |   |       |       |       | 0.040 | 4              |   |       |       |       | 0.000 | 4              |   |       |       |       | 0.002 | 4              |   |       |       |       | 0.000 | 4              |   |       |       |       | 0.027 |
| 5              |   |       |       |       |       | 5              |   |       |       |       |       | 5              |   |       |       |       |       | 5              |   |       |       |       |       | 5              |   |       |       |       |       |

| S <sub>6</sub> | 1 | 2     | 3     | 4     | 5     | S <sub>7</sub> | 1 | 2     | 3     | 4     | 5     | S <sub>8</sub> | 1 | 2     | 3     | 4     | 5     | S <sub>9</sub> | 1 | 2     | 3     | 4     | 5     | S <sub>10</sub> | 1 | 2     | 3     | 4     | 5     |
|----------------|---|-------|-------|-------|-------|----------------|---|-------|-------|-------|-------|----------------|---|-------|-------|-------|-------|----------------|---|-------|-------|-------|-------|-----------------|---|-------|-------|-------|-------|
| 1              |   | 0.077 | 0.487 | 0.031 | 0.001 | 1              |   | 0.000 | 0.000 | 0.001 | 0.715 | 1              |   | 0.000 | 0.000 | 0.001 | 0.055 | 1              |   | 0.000 | 0.000 | 0.000 | 0.003 | 1               |   | 0.000 | 0.000 | 0.010 | 0.720 |
| 2              |   |       | 0.189 | 0.013 | 0.001 | 2              |   |       | 0.000 | 0.000 | 0.129 | 2              |   |       | 0.000 | 0.000 | 0.038 | 2              |   |       | 0.000 | 0.000 | 0.000 | 2               |   |       | 0.000 | 0.001 | 0.105 |
| 3              |   |       |       | 0.006 | 0.000 | 3              |   |       |       | 0.000 | 0.147 | 3              |   |       |       | 0.012 | 0.643 | 3              |   |       |       | 0.000 | 0.000 | 3               |   |       |       | 0.001 | 0.089 |
| 4              |   |       |       |       | 0.000 | 4              |   |       |       |       | 0.002 | 4              |   |       |       |       | 0.228 | 4              |   |       |       |       | 0.080 | 4               |   |       |       |       | 0.056 |
| 5              |   |       |       |       |       | 5              |   |       |       |       |       | 5              |   |       |       |       |       | 5              |   |       |       |       |       | 5               |   |       |       |       |       |



| T <sub>1</sub>                    | 1 | 2     | 3     | 4     | 5     | T <sub>2</sub> | 1 | 2     | 3     | 4     | 5     | T <sub>3</sub> | 1 | 2     | 3     | 4     | 5     | T <sub>4</sub> | 1 | 2     | 3     | 4     | 5     | T <sub>5</sub>  | 1 | 2     | 3     | 4     | 5     |  |  |
|-----------------------------------|---|-------|-------|-------|-------|----------------|---|-------|-------|-------|-------|----------------|---|-------|-------|-------|-------|----------------|---|-------|-------|-------|-------|-----------------|---|-------|-------|-------|-------|--|--|
| 1                                 |   | 0.000 | 0.004 | 0.000 | 0.000 | 1              |   | 0.000 | 0.000 | 0.001 | 0.071 | 1              |   | 0.065 | 0.008 | 0.000 | 0.000 | 1              |   | 0.011 | 0.017 | 0.011 | 0.694 | 1               |   | 0.129 | 0.202 | 0.006 | 0.023 |  |  |
| 2                                 |   |       | 0.013 | 0.000 | 0.000 | 2              |   |       | 0.000 | 0.001 | 0.048 | 2              |   |       | 0.000 | 0.000 | 0.000 | 2              |   |       | 0.002 | 0.002 | 0.137 | 2               |   |       | 0.057 | 0.003 | 0.016 |  |  |
| 3                                 |   |       |       | 0.015 | 0.000 | 3              |   |       |       | 0.013 | 0.815 | 3              |   |       |       | 0.000 | 0.000 | 3              |   |       |       | 0.002 | 0.104 | 3               |   |       |       | 0.002 | 0.015 |  |  |
| 4                                 |   |       |       |       | 0.000 | 4              |   |       |       |       | 0.041 | 4              |   |       |       |       | 0.000 | 4              |   |       |       |       | 0.002 | 4               |   |       |       |       | 0.000 |  |  |
| 5                                 |   |       |       |       |       | 5              |   |       |       |       |       | 5              |   |       |       |       |       | 5              |   |       |       |       |       | 5               |   |       |       |       |       |  |  |
| T <sub>6</sub>                    | 1 | 2     | 3     | 4     | 5     | T <sub>7</sub> | 1 | 2     | 3     | 4     | 5     | T <sub>8</sub> | 1 | 2     | 3     | 4     | 5     | T <sub>9</sub> | 1 | 2     | 3     | 4     | 5     | T <sub>10</sub> | 1 | 2     | 3     | 4     | 5     |  |  |
| 1                                 |   | 0.007 | 0.076 | 0.000 | 0.000 | 1              |   | 0.000 | 0.000 | 0.000 | 0.101 | 1              |   | 0.000 | 0.000 | 0.000 | 0.000 | 1              |   | 0.001 | 0.015 | 0.000 | 0.000 | 1               |   | 0.000 | 0.000 | 0.000 | 0.001 |  |  |
| 2                                 |   |       | 0.000 | 0.001 | 0.000 | 2              |   |       | 0.000 | 0.000 | 0.058 | 2              |   |       | 0.000 | 0.000 | 0.000 | 2              |   |       | 0.017 | 0.000 | 0.000 | 2               |   |       | 0.000 | 0.000 | 0.001 |  |  |
| 3                                 |   |       |       | 0.007 | 0.003 | 3              |   |       |       | 0.001 | 0.804 | 3              |   |       |       | 0.000 | 0.000 | 3              |   |       |       | 0.007 | 0.000 | 3               |   |       |       | 0.000 | 0.000 |  |  |
| 4                                 |   |       |       |       | 0.000 | 4              |   |       |       |       | 0.028 | 4              |   |       |       |       | 0.003 | 4              |   |       |       |       | 0.000 | 4               |   |       |       |       | 0.006 |  |  |
| 5                                 |   |       |       |       |       | 5              |   |       |       |       |       | 5              |   |       |       |       |       | 5              |   |       |       |       |       | 5               |   |       |       |       |       |  |  |
| X <sub>2</sub> -NZ-D <sub>3</sub> |   |       |       |       |       |                |   |       |       |       |       |                |   |       |       |       |       |                |   |       |       |       |       |                 |   |       |       |       |       |  |  |
| S <sub>1</sub>                    | 1 | 2     | 3     | 4     | 5     | S <sub>2</sub> | 1 | 2     | 3     | 4     | 5     | S <sub>3</sub> | 1 | 2     | 3     | 4     | 5     | S <sub>4</sub> | 1 | 2     | 3     | 4     | 5     | S <sub>5</sub>  | 1 | 2     | 3     | 4     | 5     |  |  |
| 1                                 |   | 0.002 | 0.019 | 0.011 | 0.016 | 1              |   | 0.003 | 0.032 | 0.005 | 0.043 | 1              |   | 0.067 | 0.008 | 0.000 | 0.001 | 1              |   | 0.033 | 0.252 | 0.108 | 0.261 | 1               |   | 0.000 | 0.000 | 0.001 | 0.146 |  |  |
| 2                                 |   |       | 0.011 | 0.009 | 0.014 | 2              |   |       | 0.003 | 0.002 | 0.027 | 2              |   |       | 0.000 | 0.000 | 0.000 | 2              |   |       | 0.067 | 0.031 | 0.076 | 2               |   |       | 0.000 | 0.000 | 0.072 |  |  |
| 3                                 |   |       |       | 0.167 | 0.243 | 3              |   |       |       | 0.039 | 0.401 | 3              |   |       |       | 0.000 | 0.000 | 3              |   |       |       | 0.021 | 0.053 | 3               |   |       |       | 0.003 | 0.730 |  |  |
| 4                                 |   |       |       |       | 0.009 | 4              |   |       |       |       | 0.014 | 4              |   |       |       |       | 0.000 | 4              |   |       |       |       | 0.000 | 4               |   |       |       |       | 0.033 |  |  |
| 5                                 |   |       |       |       |       | 5              |   |       |       |       |       | 5              |   |       |       |       |       | 5              |   |       |       |       |       | 5               |   |       |       |       |       |  |  |
| S <sub>6</sub>                    | 1 | 2     | 3     | 4     | 5     | S <sub>7</sub> | 1 | 2     | 3     | 4     | 5     | S <sub>8</sub> | 1 | 2     | 3     | 4     | 5     | S <sub>9</sub> | 1 | 2     | 3     | 4     | 5     | S <sub>10</sub> | 1 | 2     | 3     | 4     | 5     |  |  |
| 1                                 |   | 0.041 | 0.261 | 0.028 | 0.329 | 1              |   | 0.000 | 0.007 | 0.018 | 0.046 | 1              |   | 0.000 | 0.002 | 0.008 | 0.625 | 1              |   | 0.000 | 0.001 | 0.004 | 0.038 | 1               |   | 0.000 | 0.007 | 0.001 | 0.002 |  |  |
| 2                                 |   |       | 0.064 | 0.007 | 0.091 | 2              |   |       | 0.000 | 0.012 | 0.030 | 2              |   |       | 0.000 | 0.001 | 0.107 | 2              |   |       | 0.000 | 0.000 | 0.005 | 2               |   |       | 0.006 | 0.000 | 0.003 |  |  |
| 3                                 |   |       |       | 0.004 | 0.066 | 3              |   |       |       | 0.205 | 0.524 | 3              |   |       |       | 0.002 | 0.171 | 3              |   |       |       | 0.003 | 0.020 | 3               |   |       |       | 0.046 | 0.041 |  |  |
| 4                                 |   |       |       |       | 0.002 | 4              |   |       |       |       | 0.020 | 4              |   |       |       |       | 0.007 | 4              |   |       |       |       | 0.063 | 4               |   |       |       |       | 0.016 |  |  |
| 5                                 |   |       |       |       |       | 5              |   |       |       |       |       | 5              |   |       |       |       |       | 5              |   |       |       |       |       | 5               |   |       |       |       |       |  |  |
| T <sub>1</sub>                    | 1 | 2     | 3     | 4     | 5     | T <sub>2</sub> | 1 | 2     | 3     | 4     | 5     | T <sub>3</sub> | 1 | 2     | 3     | 4     | 5     | T <sub>4</sub> | 1 | 2     | 3     | 4     | 5     | T <sub>5</sub>  | 1 | 2     | 3     | 4     | 5     |  |  |
| 1                                 |   | 0.000 | 0.001 | 0.000 | 0.000 | 1              |   | 0.000 | 0.006 | 0.017 | 0.045 | 1              |   | 0.065 | 0.009 | 0.001 | 0.001 | 1              |   | 0.152 | 0.240 | 0.048 | 0.065 | 1               |   | 0.000 | 0.005 | 0.000 | 0.000 |  |  |
| 2                                 |   |       | 0.012 | 0.001 | 0.000 | 2              |   |       | 0.003 | 0.012 | 0.033 | 2              |   |       | 0.000 | 0.000 | 0.000 | 2              |   |       | 0.098 | 0.024 | 0.034 | 2               |   |       | 0.014 | 0.000 | 0.000 |  |  |
| 3                                 |   |       |       | 0.036 | 0.017 | 3              |   |       |       | 0.185 | 0.500 | 3              |   |       |       | 0.000 | 0.000 | 3              |   |       |       | 0.008 | 0.012 | 3               |   |       |       | 0.017 | 0.006 |  |  |
| 4                                 |   |       |       |       | 0.000 | 4              |   |       |       |       | 0.050 | 4              |   |       |       |       | 0.000 | 4              |   |       |       |       | 0.000 | 4               |   |       |       |       | 0.000 |  |  |
| 5                                 |   |       |       |       |       | 5              |   |       |       |       |       | 5              |   |       |       |       |       | 5              |   |       |       |       |       | 5               |   |       |       |       |       |  |  |
| T <sub>6</sub>                    | 1 | 2     | 3     | 4     | 5     | T <sub>7</sub> | 1 | 2     | 3     | 4     | 5     | T <sub>8</sub> | 1 | 2     | 3     | 4     | 5     | T <sub>9</sub> | 1 | 2     | 3     | 4     | 5     | T <sub>10</sub> | 1 | 2     | 3     | 4     | 5     |  |  |

|   |       |       |       |       |   |       |       |       |       |   |       |       |       |       |   |       |       |       |       |   |       |       |       |       |
|---|-------|-------|-------|-------|---|-------|-------|-------|-------|---|-------|-------|-------|-------|---|-------|-------|-------|-------|---|-------|-------|-------|-------|
| 1 | 0.000 | 0.000 | 0.000 | 0.005 | 1 | 0.030 | 0.095 | 0.061 | 0.312 | 1 | 0.019 | 0.115 | 0.005 | 0.024 | 1 | 0.000 | 0.004 | 0.006 | 0.032 | 1 | 0.000 | 0.000 | 0.002 | 0.142 |
| 2 |       | 0.000 | 0.000 | 0.002 | 2 |       | 0.012 | 0.011 | 0.075 | 2 |       | 0.023 | 0.001 | 0.011 | 2 |       | 0.000 | 0.000 | 0.004 | 2 |       | 0.000 | 0.001 | 0.068 |
| 3 |       |       | 0.002 | 0.035 | 3 |       |       | 0.011 | 0.116 | 3 |       |       | 0.012 | 0.093 | 3 |       |       | 0.014 | 0.104 | 3 |       |       | 0.009 | 0.691 |
| 4 |       |       |       | 0.027 | 4 |       |       |       | 0.037 | 4 |       |       |       | 0.002 | 4 |       |       |       | 0.054 | 4 |       |       |       | 0.030 |
| 5 |       |       |       |       | 5 |       |       |       |       | 5 |       |       |       |       | 5 |       |       |       |       | 5 |       |       |       |       |

X<sub>2</sub>-NZ-D<sub>4</sub>

| S <sub>1</sub> | 1     | 2     | 3     | 4     | 5 | S <sub>2</sub> | 1     | 2     | 3     | 4 | 5     | S <sub>3</sub> | 1     | 2     | 3 | 4     | 5     | S <sub>4</sub> | 1     | 2 | 3     | 4     | 5     | S <sub>5</sub> | 1 | 2 | 3 | 4 | 5 |
|----------------|-------|-------|-------|-------|---|----------------|-------|-------|-------|---|-------|----------------|-------|-------|---|-------|-------|----------------|-------|---|-------|-------|-------|----------------|---|---|---|---|---|
| 1              | 0.000 | 0.000 | 0.000 | 0.000 | 1 | 0.000          | 0.000 | 0.001 | 0.063 | 1 | 0.068 | 0.006          | 0.000 | 0.000 | 1 | 0.000 | 0.000 | 0.014          | 0.729 | 1 | 0.076 | 0.487 | 0.033 | 0.000          |   |   |   |   |   |
| 2              |       | 0.158 | 0.000 | 0.000 | 2 |                | 0.000 | 0.001 | 0.046 | 2 |       | 0.000          | 0.000 | 0.000 | 2 |       | 0.000 | 0.003          | 0.142 | 2 |       | 0.187 | 0.013 | 0.000          |   |   |   |   |   |
| 3              |       |       | 0.168 | 0.000 | 3 |                |       | 0.018 | 0.813 | 3 |       |                | 0.000 | 0.000 | 3 |       |       | 0.002          | 0.099 | 3 |       |       | 0.006 | 0.000          |   |   |   |   |   |
| 4              |       |       |       | 0.000 | 4 |                |       |       | 0.048 | 4 |       |                | 0.000 |       | 4 |       |       |                | 0.002 | 4 |       |       |       | 0.000          |   |   |   |   |   |
| 5              |       |       |       |       | 5 |                |       |       |       | 5 |       |                |       |       | 5 |       |       |                |       | 5 |       |       |       |                |   |   |   |   |   |

| S <sub>6</sub> | 1     | 2     | 3     | 4     | 5 | S <sub>7</sub> | 1     | 2     | 3     | 4 | 5     | S <sub>8</sub> | 1     | 2     | 3 | 4     | 5     | S <sub>9</sub> | 1     | 2 | 3     | 4     | 5     | S <sub>10</sub> | 1 | 2 | 3 | 4 | 5 |
|----------------|-------|-------|-------|-------|---|----------------|-------|-------|-------|---|-------|----------------|-------|-------|---|-------|-------|----------------|-------|---|-------|-------|-------|-----------------|---|---|---|---|---|
| 1              | 0.000 | 0.000 | 0.000 | 0.081 | 1 | 0.000          | 0.000 | 0.000 | 0.000 | 1 | 0.000 | 0.000          | 0.000 | 0.040 | 1 | 0.000 | 0.012 | 0.000          | 0.000 | 1 | 0.000 | 0.000 | 0.001 | 0.064           |   |   |   |   |   |
| 2              |       | 0.000 | 0.000 | 0.052 | 2 |                | 0.000 | 0.000 | 0.000 | 2 |       | 0.000          | 0.000 | 0.029 | 2 |       | 0.014 | 0.000          | 0.000 | 2 |       | 0.000 | 0.001 | 0.000           |   |   |   |   |   |
| 3              |       |       | 0.005 | 0.821 | 3 |                |       | 0.000 | 0.001 | 3 |       |                | 0.009 | 0.557 | 3 |       |       | 0.006          | 0.000 | 3 |       |       | 0.007 | 0.418           |   |   |   |   |   |
| 4              |       |       |       | 0.029 | 4 |                |       |       | 0.032 | 4 |       |                | 0.334 |       | 4 |       |       |                | 0.000 | 4 |       |       |       | 0.432           |   |   |   |   |   |
| 5              |       |       |       |       | 5 |                |       |       |       | 5 |       |                |       |       | 5 |       |       |                |       | 5 |       |       |       |                 |   |   |   |   |   |

| T <sub>1</sub> | 1     | 2     | 3     | 4     | 5 | T <sub>2</sub> | 1     | 2     | 3     | 4 | 5     | T <sub>3</sub> | 1     | 2     | 3 | 4     | 5     | T <sub>4</sub> | 1     | 2 | 3     | 4     | 5     | T <sub>5</sub> | 1 | 2 | 3 | 4 | 5 |
|----------------|-------|-------|-------|-------|---|----------------|-------|-------|-------|---|-------|----------------|-------|-------|---|-------|-------|----------------|-------|---|-------|-------|-------|----------------|---|---|---|---|---|
| 1              | 0.075 | 0.030 | 0.017 | 0.007 | 1 | 0.007          | 0.021 | 0.091 | 0.226 | 1 | 0.002 | 0.001          | 0.000 | 0.000 | 1 | 0.118 | 0.058 | 0.048          | 0.064 | 1 | 0.050 | 0.042 | 0.008 | 0.002          |   |   |   |   |   |
| 2              |       | 0.009 | 0.012 | 0.007 | 2 |                | 0.013 | 0.073 | 0.185 | 2 |       | 0.000          | 0.000 | 0.000 | 2 |       | 0.001 | 0.003          | 0.005 | 2 |       | 0.055 | 0.004 | 0.001          |   |   |   |   |   |
| 3              |       |       | 0.007 | 0.004 | 3 |                |       | 0.038 | 0.105 | 3 |       |                | 0.000 | 0.000 | 3 |       |       | 0.001          | 0.002 | 3 |       |       | 0.005 | 0.001          |   |   |   |   |   |
| 4              |       |       |       | 0.000 | 4 |                |       |       | 0.047 | 4 |       |                | 0.000 |       | 4 |       |       |                | 0.000 | 4 |       |       |       | 0.000          |   |   |   |   |   |
| 5              |       |       |       |       | 5 |                |       |       |       | 5 |       |                |       |       | 5 |       |       |                |       | 5 |       |       |       |                |   |   |   |   |   |

| T <sub>6</sub> | 1     | 2     | 3     | 4     | 5 | T <sub>7</sub> | 1     | 2     | 3     | 4 | 5     | T <sub>8</sub> | 1     | 2     | 3 | 4     | 5     | T <sub>9</sub> | 1     | 2 | 3     | 4     | 5     | T <sub>10</sub> | 1 | 2 | 3 | 4 | 5 |
|----------------|-------|-------|-------|-------|---|----------------|-------|-------|-------|---|-------|----------------|-------|-------|---|-------|-------|----------------|-------|---|-------|-------|-------|-----------------|---|---|---|---|---|
| 1              | 0.000 | 0.002 | 0.001 | 0.016 | 1 | 0.025          | 0.030 | 0.035 | 0.194 | 1 | 0.050 | 0.014          | 0.008 | 0.049 | 1 | 0.003 | 0.006 | 0.011          | 0.059 | 1 | 0.000 | 0.066 | 0.005 | 0.033           |   |   |   |   |   |
| 2              |       | 0.001 | 0.001 | 0.013 | 2 |                | 0.006 | 0.004 | 0.046 | 2 |       | 0.002          | 0.005 | 0.043 | 2 |       | 0.004 | 0.004          | 0.036 | 2 |       | 0.047 | 0.004 | 0.232           |   |   |   |   |   |
| 3              |       |       | 0.001 | 0.020 | 3 |                |       | 0.003 | 0.013 | 3 |       |                | 0.001 | 0.010 | 3 |       |       | 0.005          | 0.003 | 3 |       |       | 0.003 | 0.115           |   |   |   |   |   |
| 4              |       |       |       | 0.027 | 4 |                |       |       | 0.033 | 4 |       |                | 0.001 |       | 4 |       |       |                | 0.048 | 4 |       |       |       | 0.025           |   |   |   |   |   |
| 5              |       |       |       |       | 5 |                |       |       |       | 5 |       |                |       |       | 5 |       |       |                |       | 5 |       |       |       |                 |   |   |   |   |   |

X<sub>2</sub>-NZ-D<sub>5</sub>

| S <sub>1</sub> | 1 | 2 | 3 | 4 | 5 | S <sub>2</sub> | 1 | 2 | 3 | 4 | 5 | S <sub>3</sub> | 1 | 2 | 3 | 4 | 5 | S <sub>4</sub> | 1 | 2 | 3 | 4 | 5 | S <sub>5</sub> | 1 | 2 | 3 | 4 | 5 |
|----------------|---|---|---|---|---|----------------|---|---|---|---|---|----------------|---|---|---|---|---|----------------|---|---|---|---|---|----------------|---|---|---|---|---|
|----------------|---|---|---|---|---|----------------|---|---|---|---|---|----------------|---|---|---|---|---|----------------|---|---|---|---|---|----------------|---|---|---|---|---|

|   |       |       |       |       |   |       |       |       |       |   |       |       |       |       |   |       |       |       |       |   |       |       |       |       |
|---|-------|-------|-------|-------|---|-------|-------|-------|-------|---|-------|-------|-------|-------|---|-------|-------|-------|-------|---|-------|-------|-------|-------|
| 1 | 0.002 | 0.018 | 0.005 | 0.014 | 1 | 0.001 | 0.020 | 0.001 | 0.047 | 1 | 0.067 | 0.010 | 0.000 | 0.000 | 1 | 0.000 | 0.000 | 0.000 | 0.100 | 1 | 0.012 | 0.092 | 0.039 | 0.570 |
| 2 |       | 0.014 | 0.003 | 0.014 | 2 |       | 0.005 | 0.000 | 0.031 | 2 |       | 0.000 | 0.000 | 0.000 | 2 |       | 0.000 | 0.000 | 0.057 | 2 |       | 0.018 | 0.009 | 0.125 |
| 3 |       |       | 0.075 | 0.265 | 3 |       |       | 0.008 | 0.541 | 3 |       |       | 0.000 | 0.000 | 3 |       |       | 0.001 | 0.798 | 3 |       |       | 0.006 | 0.095 |
| 4 |       |       |       | 0.010 | 4 |       |       |       | 0.019 | 4 |       |       |       | 0.000 | 4 |       |       |       | 0.034 | 4 |       |       |       | 0.001 |
| 5 |       |       |       |       | 5 |       |       |       |       | 5 |       |       |       |       | 5 |       |       |       |       | 5 |       |       |       |       |

|                |       |       |       |       |   |                |       |       |       |   |       |                |       |       |   |       |       |                |       |   |       |       |       |                 |   |   |   |   |   |
|----------------|-------|-------|-------|-------|---|----------------|-------|-------|-------|---|-------|----------------|-------|-------|---|-------|-------|----------------|-------|---|-------|-------|-------|-----------------|---|---|---|---|---|
| S <sub>6</sub> | 1     | 2     | 3     | 4     | 5 | S <sub>7</sub> | 1     | 2     | 3     | 4 | 5     | S <sub>8</sub> | 1     | 2     | 3 | 4     | 5     | S <sub>9</sub> | 1     | 2 | 3     | 4     | 5     | S <sub>10</sub> | 1 | 2 | 3 | 4 | 5 |
| 1              | 0.064 | 0.414 | 0.024 | 0.119 | 1 | 0.000          | 0.000 | 0.000 | 0.718 | 1 | 0.000 | 0.000          | 0.000 | 0.000 | 1 | 0.000 | 0.005 | 0.011          | 0.025 | 1 | 0.000 | 0.012 | 0.000 | 0.000           |   |   |   |   |   |
| 2              |       | 0.140 | 0.009 | 0.044 | 2 |                | 0.000 | 0.000 | 0.129 | 2 |       | 0.000          | 0.000 | 0.000 | 2 |       | 0.001 | 0.010          | 0.022 | 2 |       | 0.013 | 0.000 | 0.000           |   |   |   |   |   |
| 3              |       |       | 0.004 | 0.022 | 3 |                |       | 0.000 | 0.143 | 3 |       |                | 0.000 | 0.002 | 3 |       |       | 0.221          | 0.510 | 3 |       |       | 0.020 | 0.005           |   |   |   |   |   |
| 4              |       |       |       | 0.000 | 4 |                |       |       | 0.003 | 4 |       |                |       | 0.029 | 4 |       |       |                | 0.030 | 4 |       |       |       | 0.000           |   |   |   |   |   |
| 5              |       |       |       |       | 5 |                |       |       |       | 5 |       |                |       |       | 5 |       |       |                |       | 5 |       |       |       |                 |   |   |   |   |   |

|                |       |       |       |       |   |                |       |       |       |   |       |                |       |       |   |       |       |                |       |   |       |       |       |                |   |   |   |   |   |
|----------------|-------|-------|-------|-------|---|----------------|-------|-------|-------|---|-------|----------------|-------|-------|---|-------|-------|----------------|-------|---|-------|-------|-------|----------------|---|---|---|---|---|
| T <sub>1</sub> | 1     | 2     | 3     | 4     | 5 | T <sub>2</sub> | 1     | 2     | 3     | 4 | 5     | T <sub>3</sub> | 1     | 2     | 3 | 4     | 5     | T <sub>4</sub> | 1     | 2 | 3     | 4     | 5     | T <sub>5</sub> | 1 | 2 | 3 | 4 | 5 |
| 1              | 0.000 | 0.003 | 0.000 | 0.000 | 1 | 0.000          | 0.001 | 0.005 | 0.071 | 1 | 0.066 | 0.008          | 0.000 | 0.000 | 1 | 0.189 | 0.216 | 0.016          | 0.025 | 1 | 0.000 | 0.009 | 0.000 | 0.000          |   |   |   |   |   |
| 2              |       | 0.009 | 0.000 | 0.000 | 2 |                | 0.000 | 0.004 | 0.046 | 2 |       | 0.000          | 0.000 | 0.000 | 2 |       | 0.099 | 0.010          | 0.016 | 2 |       | 0.009 | 0.000 | 0.000          |   |   |   |   |   |
| 3              |       |       | 0.017 | 0.005 | 3 |                |       | 0.056 | 0.740 | 3 |       |                | 0.000 | 0.000 | 3 |       |       | 0.003          | 0.006 | 3 |       |       | 0.014 | 0.002          |   |   |   |   |   |
| 4              |       |       |       | 0.000 | 4 |                |       |       | 0.047 | 4 |       |                |       | 0.000 | 4 |       |       |                | 0.000 | 4 |       |       |       | 0.000          |   |   |   |   |   |
| 5              |       |       |       |       | 5 |                |       |       |       | 5 |       |                |       |       | 5 |       |       |                |       | 5 |       |       |       |                |   |   |   |   |   |

|                |       |       |       |       |   |                |       |       |       |   |       |                |       |       |   |       |       |                |       |   |       |       |       |                 |   |   |   |   |   |
|----------------|-------|-------|-------|-------|---|----------------|-------|-------|-------|---|-------|----------------|-------|-------|---|-------|-------|----------------|-------|---|-------|-------|-------|-----------------|---|---|---|---|---|
| T <sub>6</sub> | 1     | 2     | 3     | 4     | 5 | T <sub>7</sub> | 1     | 2     | 3     | 4 | 5     | T <sub>8</sub> | 1     | 2     | 3 | 4     | 5     | T <sub>9</sub> | 1     | 2 | 3     | 4     | 5     | T <sub>10</sub> | 1 | 2 | 3 | 4 | 5 |
| 1              | 0.000 | 0.000 | 0.000 | 0.099 | 1 | 0.000          | 0.000 | 0.000 | 0.000 | 1 | 0.015 | 0.021          | 0.028 | 0.655 | 1 | 0.002 | 0.030 | 0.000          | 0.000 | 1 | 0.000 | 0.000 | 0.000 | 0.013           |   |   |   |   |   |
| 2              |       | 0.000 | 0.000 | 0.057 | 2 |                | 0.000 | 0.000 | 0.000 | 2 |       | 0.002          | 0.005 | 0.130 | 2 |       | 0.019 | 0.000          | 0.000 | 2 |       | 0.000 | 0.000 | 0.000           |   |   |   |   |   |
| 3              |       |       | 0.001 | 0.794 | 3 |                |       | 0.000 | 0.002 | 3 |       |                | 0.004 | 0.107 | 3 |       |       | 0.002          | 0.010 | 3 |       |       | 0.000 | 0.003           |   |   |   |   |   |
| 4              |       |       |       | 0.035 | 4 |                |       |       | 0.030 | 4 |       |                |       | 0.008 | 4 |       |       |                | 0.000 | 4 |       |       |       | 0.004           |   |   |   |   |   |
| 5              |       |       |       |       | 5 |                |       |       |       | 5 |       |                |       |       | 5 |       |       |                |       | 5 |       |       |       |                 |   |   |   |   |   |

X<sub>2</sub>-NZ-D<sub>6</sub>

|                |       |       |       |       |   |                |       |       |       |   |       |                |       |       |   |       |       |                |       |   |       |       |       |                 |   |   |   |   |   |
|----------------|-------|-------|-------|-------|---|----------------|-------|-------|-------|---|-------|----------------|-------|-------|---|-------|-------|----------------|-------|---|-------|-------|-------|-----------------|---|---|---|---|---|
| S <sub>1</sub> | 1     | 2     | 3     | 4     | 5 | S <sub>2</sub> | 1     | 2     | 3     | 4 | 5     | S <sub>3</sub> | 1     | 2     | 3 | 4     | 5     | S <sub>4</sub> | 1     | 2 | 3     | 4     | 5     | S <sub>5</sub>  | 1 | 2 | 3 | 4 | 5 |
| 1              | 0.002 | 0.021 | 0.004 | 0.006 | 1 | 0.001          | 0.011 | 0.002 | 0.067 | 1 | 0.066 | 0.007          | 0.001 | 0.000 | 1 | 0.028 | 0.198 | 0.044          | 0.412 | 1 | 0.049 | 0.315 | 0.018 | 0.263           |   |   |   |   |   |
| 2              |       | 0.020 | 0.003 | 0.007 | 2 |                | 0.003 | 0.001 | 0.042 | 2 |       | 0.000          | 0.000 | 0.000 | 2 |       | 0.047 | 0.012          | 0.107 | 2 |       | 0.088 | 0.005 | 0.082           |   |   |   |   |   |
| 3              |       |       | 0.072 | 0.129 | 3 |                |       | 0.013 | 0.671 | 3 |       |                | 0.000 | 0.000 | 3 |       |       | 0.008          | 0.074 | 3 |       |       | 0.002 | 0.052           |   |   |   |   |   |
| 4              |       |       |       | 0.004 | 4 |                |       |       | 0.024 | 4 |       |                |       | 0.000 | 4 |       |       |                | 0.000 | 4 |       |       |       | 0.001           |   |   |   |   |   |
| 5              |       |       |       |       | 5 |                |       |       |       | 5 |       |                |       |       | 5 |       |       |                |       | 5 |       |       |       |                 |   |   |   |   |   |
| S <sub>6</sub> | 1     | 2     | 3     | 4     | 5 | S <sub>7</sub> | 1     | 2     | 3     | 4 | 5     | S <sub>8</sub> | 1     | 2     | 3 | 4     | 5     | S <sub>9</sub> | 1     | 2 | 3     | 4     | 5     | S <sub>10</sub> | 1 | 2 | 3 | 4 | 5 |
| 1              | 0.000 | 0.003 | 0.010 | 0.048 | 1 | 0.000          | 0.000 | 0.000 | 0.000 | 1 | 0.000 | 0.012          | 0.000 | 0.000 | 1 | 0.000 | 0.016 | 0.003          | 0.080 | 1 | 0.116 | 0.032 | 0.000 | 0.020           |   |   |   |   |   |

|   |       |       |       |       |       |       |       |       |       |       |       |   |       |       |       |   |       |       |       |
|---|-------|-------|-------|-------|-------|-------|-------|-------|-------|-------|-------|---|-------|-------|-------|---|-------|-------|-------|
| 2 | 0.001 | 0.007 | 0.035 | 2     | 0.000 | 0.000 | 0.000 | 2     | 0.016 | 0.000 | 0.000 | 2 | 0.003 | 0.002 | 0.047 | 2 | 0.000 | 0.000 | 0.003 |
| 3 | 0.130 | 0.656 | 3     | 0.000 | 0.001 | 3     | 0.011 | 0.002 | 3     | 0.034 | 0.713 | 3 | 0.000 | 0.010 |       |   |       |       |       |
| 4 | 0.029 | 4     | 0.028 | 4     | 0.000 | 4     | 0.031 | 4     | 0.000 |       |       |   |       |       |       |   |       |       |       |
| 5 | 5     | 5     | 5     | 5     | 5     | 5     | 5     | 5     | 5     |       |       |   |       |       |       |   |       |       |       |

| T <sub>1</sub> | 1     | 2     | 3     | 4     | 5     | T <sub>2</sub> | 1     | 2     | 3     | 4     | 5     | T <sub>3</sub> | 1     | 2     | 3     | 4     | 5     | T <sub>4</sub> | 1     | 2 | 3     | 4     | 5     | T <sub>5</sub> | 1 | 2 | 3 | 4 | 5 |
|----------------|-------|-------|-------|-------|-------|----------------|-------|-------|-------|-------|-------|----------------|-------|-------|-------|-------|-------|----------------|-------|---|-------|-------|-------|----------------|---|---|---|---|---|
| 1              | 0.000 | 0.001 | 0.000 | 0.000 | 1     | 0.000          | 0.001 | 0.006 | 0.074 | 1     | 0.065 | 0.010          | 0.000 | 0.000 | 1     | 0.188 | 0.209 | 0.013          | 0.016 | 1 | 0.000 | 0.010 | 0.000 | 0.000          |   |   |   |   |   |
| 2              | 0.011 | 0.000 | 0.000 | 2     | 0.001 | 0.004          | 0.048 | 2     | 0.000 | 0.000 | 0.000 | 2              | 0.095 | 0.007 | 0.010 | 2     | 0.006 | 0.000          | 0.000 |   |       |       |       |                |   |   |   |   |   |
| 3              | 0.020 | 0.004 | 3     | 0.055 | 0.736 | 3              | 0.000 | 0.000 | 3     | 0.001 | 0.003 | 3              | 0.010 | 0.000 |       |       |       |                |       |   |       |       |       |                |   |   |   |   |   |
| 4              | 0.000 | 4     | 0.042 | 4     | 0.000 | 4              | 0.000 | 4     | 0.000 | 0.000 | 4     | 0.000          | 4     | 0.000 |       |       |       |                |       |   |       |       |       |                |   |   |   |   |   |
| 5              | 5     | 5     | 5     | 5     | 5     | 5              | 5     | 5     | 5     | 5     | 5     | 5              | 5     | 5     |       |       |       |                |       |   |       |       |       |                |   |   |   |   |   |

| T <sub>6</sub> | 1     | 2     | 3     | 4     | 5     | T <sub>7</sub> | 1     | 2     | 3     | 4     | 5     | T <sub>8</sub> | 1     | 2     | 3     | 4     | 5     | T <sub>9</sub> | 1     | 2 | 3     | 4     | 5     | T <sub>10</sub> | 1 | 2 | 3 | 4 | 5 |
|----------------|-------|-------|-------|-------|-------|----------------|-------|-------|-------|-------|-------|----------------|-------|-------|-------|-------|-------|----------------|-------|---|-------|-------|-------|-----------------|---|---|---|---|---|
| 1              | 0.001 | 0.020 | 0.000 | 0.000 | 1     | 0.010          | 0.012 | 0.039 | 0.622 | 1     | 0.000 | 0.000          | 0.000 | 0.009 | 1     | 0.000 | 0.011 | 0.023          | 0.069 | 1 | 0.059 | 0.025 | 0.002 | 0.015           |   |   |   |   |   |
| 2              | 0.018 | 0.000 | 0.000 | 2     | 0.000 | 0.007          | 0.124 | 2     | 0.000 | 0.000 | 0.000 | 2              | 0.007 | 0.008 | 0.026 | 2     | 0.000 | 0.000          | 0.001 |   |       |       |       |                 |   |   |   |   |   |
| 3              | 0.002 | 0.002 | 3     | 0.007 | 0.124 | 3              | 0.000 | 0.003 | 3     | 0.151 | 0.416 | 3              | 0.000 | 0.000 |       |       |       |                |       |   |       |       |       |                 |   |   |   |   |   |
| 4              | 0.000 | 4     | 0.015 | 4     | 0.023 | 4              | 0.076 | 4     | 0.000 |       |       |                |       |       |       |       |       |                |       |   |       |       |       |                 |   |   |   |   |   |
| 5              | 5     | 5     | 5     | 5     | 5     | 5              | 5     | 5     | 5     | 5     | 5     | 5              | 5     | 5     |       |       |       |                |       |   |       |       |       |                 |   |   |   |   |   |

X<sub>2</sub>-NZ-D<sub>7</sub>

| S <sub>1</sub> | 1     | 2     | 3     | 4     | 5     | S <sub>2</sub> | 1     | 2     | 3     | 4     | 5     | S <sub>3</sub> | 1     | 2     | 3     | 4     | 5     | S <sub>4</sub> | 1     | 2 | 3     | 4     | 5     | S <sub>5</sub> | 1 | 2 | 3 | 4 | 5 |
|----------------|-------|-------|-------|-------|-------|----------------|-------|-------|-------|-------|-------|----------------|-------|-------|-------|-------|-------|----------------|-------|---|-------|-------|-------|----------------|---|---|---|---|---|
| 1              | 0.002 | 0.023 | 0.005 | 0.005 | 1     | 0.066          | 0.008 | 0.000 | 0.000 | 1     | 0.000 | 0.009          | 0.005 | 0.041 | 1     | 0.061 | 0.405 | 0.059          | 0.098 | 1 | 0.000 | 0.000 | 0.000 | 0.078          |   |   |   |   |   |
| 2              | 0.020 | 0.004 | 0.005 | 2     | 0.000 | 0.000          | 0.000 | 2     | 0.004 | 0.004 | 0.033 | 2              | 0.138 | 0.022 | 0.036 | 2     | 0.000 | 0.000          | 0.052 |   |       |       |       |                |   |   |   |   |   |
| 3              | 0.085 | 0.103 | 3     | 0.000 | 0.000 | 3              | 0.072 | 0.593 | 3     | 0.010 | 0.018 | 3              | 0.001 | 0.810 |       |       |       |                |       |   |       |       |       |                |   |   |   |   |   |
| 4              | 0.003 | 4     | 0.000 | 4     | 0.025 | 4              | 0.000 | 4     | 0.000 | 0.000 | 4     | 0.039          |       |       |       |       |       |                |       |   |       |       |       |                |   |   |   |   |   |
| 5              | 5     | 5     | 5     | 5     | 5     | 5              | 5     | 5     | 5     | 5     | 5     | 5              | 5     | 5     |       |       |       |                |       |   |       |       |       |                |   |   |   |   |   |

| S <sub>6</sub> | 1     | 2     | 3     | 4     | 5     | S <sub>7</sub> | 1     | 2     | 3     | 4     | 5     | S <sub>8</sub> | 1     | 2     | 3     | 4     | 5     | S <sub>9</sub> | 1     | 2 | 3     | 4     | 5     | S <sub>10</sub> | 1 | 2 | 3 | 4 | 5 |
|----------------|-------|-------|-------|-------|-------|----------------|-------|-------|-------|-------|-------|----------------|-------|-------|-------|-------|-------|----------------|-------|---|-------|-------|-------|-----------------|---|---|---|---|---|
| 1              | 0.024 | 0.112 | 0.047 | 0.531 | 1     | 0.000          | 0.010 | 0.000 | 0.000 | 1     | 0.119 | 0.013          | 0.000 | 0.002 | 1     | 0.000 | 0.000 | 0.000          | 0.001 | 1 | 0.010 | 0.013 | 0.005 | 0.001           |   |   |   |   |   |
| 2              | 0.022 | 0.011 | 0.121 | 2     | 0.016 | 0.000          | 0.000 | 2     | 0.000 | 0.000 | 0.000 | 2              | 0.000 | 0.000 | 0.000 | 2     | 0.180 | 0.000          | 0.000 |   |       |       |       |                 |   |   |   |   |   |
| 3              | 0.006 | 0.074 | 3     | 0.010 | 0.002 | 3              | 0.000 | 0.000 | 3     | 0.000 | 0.007 | 3              | 0.086 | 0.020 |       |       |       |                |       |   |       |       |       |                 |   |   |   |   |   |
| 4              | 0.001 | 4     | 0.000 | 4     | 0.000 | 4              | 0.056 | 4     | 0.000 |       |       |                |       |       |       |       |       |                |       |   |       |       |       |                 |   |   |   |   |   |
| 5              | 5     | 5     | 5     | 5     | 5     | 5              | 5     | 5     | 5     | 5     | 5     | 5              | 5     | 5     |       |       |       |                |       |   |       |       |       |                 |   |   |   |   |   |

| T <sub>1</sub> | 1     | 2     | 3     | 4     | 5     | T <sub>2</sub> | 1     | 2     | 3     | 4     | 5     | T <sub>3</sub> | 1     | 2     | 3     | 4     | 5     | T <sub>4</sub> | 1     | 2 | 3     | 4     | 5     | T <sub>5</sub> | 1 | 2 | 3 | 4 | 5 |
|----------------|-------|-------|-------|-------|-------|----------------|-------|-------|-------|-------|-------|----------------|-------|-------|-------|-------|-------|----------------|-------|---|-------|-------|-------|----------------|---|---|---|---|---|
| 1              | 0.000 | 0.004 | 0.000 | 0.000 | 1     | 0.067          | 0.007 | 0.001 | 0.000 | 1     | 0.003 | 0.007          | 0.020 | 0.076 | 1     | 0.154 | 0.165 | 0.023          | 0.048 | 1 | 0.000 | 0.006 | 0.000 | 0.000          |   |   |   |   |   |
| 2              | 0.012 | 0.000 | 0.000 | 2     | 0.000 | 0.000          | 0.000 | 2     | 0.014 | 0.011 | 0.048 | 2              | 0.048 | 0.012 | 0.033 | 2     | 0.012 | 0.000          | 0.000 |   |       |       |       |                |   |   |   |   |   |

|                |   |       |       |       |       |                |   |       |       |       |       |                |   |       |       |       |       |                |       |       |       |       |       |                 |       |       |       |       |       |
|----------------|---|-------|-------|-------|-------|----------------|---|-------|-------|-------|-------|----------------|---|-------|-------|-------|-------|----------------|-------|-------|-------|-------|-------|-----------------|-------|-------|-------|-------|-------|
| 3              |   |       | 0.017 | 0.005 | 3     |                |   |       | 0.000 | 0.000 | 3     |                |   | 0.122 | 0.483 | 3     |       |                | 0.006 | 0.020 | 3     |       |       | 0.013           | 0.003 |       |       |       |       |
| 4              |   |       |       | 0.000 | 4     |                |   |       |       | 0.000 | 4     |                |   |       | 0.049 | 4     |       |                |       | 0.000 | 4     |       |       |                 | 0.000 |       |       |       |       |
| 5              |   |       |       |       | 5     |                |   |       |       |       | 5     |                |   |       |       | 5     |       |                |       |       | 5     |       |       |                 |       |       |       |       |       |
| T <sub>6</sub> | 1 | 2     | 3     | 4     | 5     | T <sub>7</sub> | 1 | 2     | 3     | 4     | 5     | T <sub>8</sub> | 1 | 2     | 3     | 4     | 5     | T <sub>9</sub> | 1     | 2     | 3     | 4     | 5     | T <sub>10</sub> | 1     | 2     | 3     | 4     | 5     |
| 1              |   | 0.000 | 0.013 | 0.000 | 0.000 | 1              |   | 0.000 | 0.000 | 0.000 | 0.000 | 1              |   | 0.000 | 0.000 | 0.000 | 0.006 | 1              |       | 0.059 | 0.009 | 0.001 | 0.000 | 1               |       | 0.064 | 0.075 | 0.074 | 0.418 |
| 2              |   |       | 0.018 | 0.000 | 0.000 | 2              |   |       | 0.000 | 0.000 | 0.001 | 2              |   |       | 0.000 | 0.000 | 0.006 | 2              |       |       | 0.000 | 0.000 | 0.000 | 2               |       |       | 0.009 | 0.017 | 0.104 |
| 3              |   |       |       | 0.002 | 0.002 | 3              |   |       |       | 0.001 | 0.002 | 3              |   |       |       | 0.000 | 0.087 | 3              |       |       |       | 0.000 | 0.000 | 3               |       |       |       | 0.010 | 0.065 |
| 4              |   |       |       |       | 0.000 | 4              |   |       |       |       | 0.040 | 4              |   |       |       |       | 0.017 | 4              |       |       |       |       | 0.000 | 4               |       |       |       |       | 0.008 |
| 5              |   |       |       |       |       | 5              |   |       |       |       |       | 5              |   |       |       |       |       | 5              |       |       |       |       |       | 5               |       |       |       |       |       |

X<sub>2</sub>-NZ-D<sub>8</sub>

|                |   |       |       |       |       |                |   |       |       |       |       |                |   |       |       |       |       |                |   |       |       |       |       |                 |   |       |       |       |       |
|----------------|---|-------|-------|-------|-------|----------------|---|-------|-------|-------|-------|----------------|---|-------|-------|-------|-------|----------------|---|-------|-------|-------|-------|-----------------|---|-------|-------|-------|-------|
| S <sub>1</sub> | 1 | 2     | 3     | 4     | 5     | S <sub>2</sub> | 1 | 2     | 3     | 4     | 5     | S <sub>3</sub> | 1 | 2     | 3     | 4     | 5     | S <sub>4</sub> | 1 | 2     | 3     | 4     | 5     | S <sub>5</sub>  | 1 | 2     | 3     | 4     | 5     |
| 1              |   | 0.002 | 0.026 | 0.005 | 0.003 | 1              |   | 0.064 | 0.008 | 0.000 | 0.000 | 1              |   | 0.001 | 0.012 | 0.010 | 0.074 | 1              |   | 0.060 | 0.429 | 0.056 | 0.055 | 1               |   | 0.011 | 0.063 | 0.042 | 0.597 |
| 2              |   |       | 0.019 | 0.004 | 0.002 | 2              |   |       | 0.000 | 0.000 | 0.000 | 2              |   |       | 0.000 | 0.005 | 0.040 | 2              |   |       | 0.149 | 0.021 | 0.021 | 2               |   |       | 0.011 | 0.008 | 0.122 |
| 3              |   |       |       | 0.081 | 0.049 | 3              |   |       |       | 0.000 | 0.000 | 3              |   |       |       | 0.078 | 0.598 | 3              |   |       |       | 0.012 | 0.012 | 3               |   |       |       | 0.007 | 0.099 |
| 4              |   |       |       |       | 0.001 | 4              |   |       |       |       | 0.000 | 4              |   |       |       |       | 0.028 | 4              |   |       |       |       | 0.000 | 4               |   |       |       |       | 0.005 |
| 5              |   |       |       |       |       | 5              |   |       |       |       |       | 5              |   |       |       |       |       | 5              |   |       |       |       |       | 5               |   |       |       |       |       |
| S <sub>6</sub> | 1 | 2     | 3     | 4     | 5     | S <sub>7</sub> | 1 | 2     | 3     | 4     | 5     | S <sub>8</sub> | 1 | 2     | 3     | 4     | 5     | S <sub>9</sub> | 1 | 2     | 3     | 4     | 5     | S <sub>10</sub> | 1 | 2     | 3     | 4     | 5     |
| 1              |   | 0.000 | 0.008 | 0.000 | 0.000 | 1              |   | 0.115 | 0.015 | 0.004 | 0.003 | 1              |   | 0.001 | 0.010 | 0.006 | 0.008 | 1              |   | 0.000 | 0.001 | 0.003 | 0.015 | 1               |   | 0.046 | 0.008 | 0.037 | 0.022 |
| 2              |   |       | 0.014 | 0.000 | 0.001 | 2              |   |       | 0.000 | 0.000 | 0.001 | 2              |   |       | 0.027 | 0.001 | 0.003 | 2              |   |       | 0.004 | 0.001 | 0.001 | 2               |   |       | 0.236 | 0.012 | 0.010 |
| 3              |   |       |       | 0.016 | 0.001 | 3              |   |       |       | 0.000 | 0.000 | 3              |   |       |       | 0.135 | 0.143 | 3              |   |       |       | 0.024 | 0.167 | 3               |   |       |       | 0.190 | 0.109 |
| 4              |   |       |       |       | 0.000 | 4              |   |       |       |       | 0.000 | 4              |   |       |       |       | 0.019 | 4              |   |       |       |       | 0.042 | 4               |   |       |       |       | 0.003 |
| 5              |   |       |       |       |       | 5              |   |       |       |       |       | 5              |   |       |       |       |       | 5              |   |       |       |       |       | 5               |   |       |       |       |       |
| T <sub>1</sub> | 1 | 2     | 3     | 4     | 5     | T <sub>2</sub> | 1 | 2     | 3     | 4     | 5     | T <sub>3</sub> | 1 | 2     | 3     | 4     | 5     | T <sub>4</sub> | 1 | 2     | 3     | 4     | 5     | T <sub>5</sub>  | 1 | 2     | 3     | 4     | 5     |
| 1              |   | 0.000 | 0.002 | 0.000 | 0.000 | 1              |   | 0.063 | 0.007 | 0.000 | 0.000 | 1              |   | 0.135 | 0.192 | 0.032 | 0.052 | 1              |   | 0.001 | 0.001 | 0.003 | 0.010 | 1               |   | 0.000 | 0.005 | 0.000 | 0.000 |
| 2              |   |       | 0.011 | 0.000 | 0.000 | 2              |   |       | 0.000 | 0.000 | 0.000 | 2              |   |       | 0.074 | 0.015 | 0.027 | 2              |   |       | 0.030 | 0.005 | 0.032 | 2               |   |       | 0.014 | 0.000 | 0.000 |
| 3              |   |       |       | 0.027 | 0.006 | 3              |   |       |       | 0.000 | 0.000 | 3              |   |       |       | 0.004 | 0.010 | 3              |   |       |       | 0.085 | 0.292 | 3               |   |       |       | 0.014 | 0.002 |
| 4              |   |       |       |       | 0.000 | 4              |   |       |       |       | 0.000 | 4              |   |       |       |       | 0.001 | 4              |   |       |       |       | 0.046 | 4               |   |       |       |       | 0.000 |
| 5              |   |       |       |       |       | 5              |   |       |       |       |       | 5              |   |       |       |       |       | 5              |   |       |       |       |       | 5               |   |       |       |       |       |
| T <sub>6</sub> | 1 | 2     | 3     | 4     | 5     | T <sub>7</sub> | 1 | 2     | 3     | 4     | 5     | T <sub>8</sub> | 1 | 2     | 3     | 4     | 5     | T <sub>9</sub> | 1 | 2     | 3     | 4     | 5     | T <sub>10</sub> | 1 | 2     | 3     | 4     | 5     |
| 1              |   | 0.000 | 0.002 | 0.000 | 0.000 | 1              |   | 0.001 | 0.002 | 0.009 | 0.055 | 1              |   | 0.056 | 0.013 | 0.002 | 0.000 | 1              |   | 0.004 | 0.018 | 0.007 | 0.042 | 1               |   | 0.058 | 0.096 | 0.062 | 0.246 |
| 2              |   |       | 0.016 | 0.000 | 0.000 | 2              |   |       | 0.002 | 0.002 | 0.016 | 2              |   |       | 0.000 | 0.000 | 0.000 | 2              |   |       | 0.000 | 0.000 | 0.001 | 2               |   |       | 0.005 | 0.017 | 0.069 |
| 3              |   |       |       | 0.001 | 0.010 | 3              |   |       |       | 0.033 | 0.211 | 3              |   |       |       | 0.000 | 0.000 | 3              |   |       |       | 0.000 | 0.000 | 3               |   |       |       | 0.023 | 0.096 |

|   |       |   |       |   |       |   |       |   |       |
|---|-------|---|-------|---|-------|---|-------|---|-------|
| 4 | 0.000 | 4 | 0.026 | 4 | 0.000 | 4 | 0.000 | 4 | 0.003 |
| 5 |       | 5 |       | 5 |       | 5 |       | 5 |       |

X<sub>2</sub>-NZ-D<sub>9</sub>

| S <sub>1</sub> | 1     | 2     | 3     | 4     | 5 | S <sub>2</sub> | 1     | 2     | 3     | 4     | 5 | S <sub>3</sub> | 1     | 2     | 3     | 4     | 5 | S <sub>4</sub> | 1     | 2     | 3     | 4     | 5 | S <sub>5</sub> | 1     | 2     | 3     | 4     | 5 |
|----------------|-------|-------|-------|-------|---|----------------|-------|-------|-------|-------|---|----------------|-------|-------|-------|-------|---|----------------|-------|-------|-------|-------|---|----------------|-------|-------|-------|-------|---|
| 1              | 0.002 | 0.022 | 0.003 | 0.001 |   | 1              | 0.066 | 0.010 | 0.001 | 0.000 |   | 1              | 0.000 | 0.003 | 0.005 | 0.066 |   | 1              | 0.074 | 0.466 | 0.038 | 0.026 |   | 1              | 0.000 | 0.007 | 0.020 | 0.142 |   |
| 2              |       | 0.026 | 0.002 | 0.001 |   | 2              |       | 0.000 | 0.000 | 0.000 |   | 2              |       | 0.001 | 0.003 | 0.045 |   | 2              |       | 0.173 | 0.015 | 0.010 |   | 2              |       | 0.002 | 0.008 | 0.054 |   |
| 3              |       |       | 0.053 | 0.028 |   | 3              |       |       | 0.000 | 0.000 |   | 3              |       |       | 0.053 | 0.727 |   | 3              |       |       | 0.007 | 0.005 |   | 3              |       |       | 0.086 | 0.605 |   |
| 4              |       |       |       | 0.001 |   | 4              |       |       |       | 0.000 |   | 4              |       |       |       | 0.032 |   | 4              |       |       |       | 0.000 |   | 4              |       |       |       | 0.028 |   |
| 5              |       |       |       |       |   | 5              |       |       |       |       |   | 5              |       |       |       |       |   | 5              |       |       |       |       |   | 5              |       |       |       |       |   |

| S <sub>6</sub> | 1     | 2     | 3     | 4     | 5 | S <sub>7</sub> | 1     | 2     | 3     | 4     | 5 | S <sub>8</sub> | 1     | 2     | 3     | 4     | 5 | S <sub>9</sub> | 1     | 2     | 3     | 4     | 5 | S <sub>10</sub> | 1     | 2     | 3     | 4     | 5 |
|----------------|-------|-------|-------|-------|---|----------------|-------|-------|-------|-------|---|----------------|-------|-------|-------|-------|---|----------------|-------|-------|-------|-------|---|-----------------|-------|-------|-------|-------|---|
| 1              | 0.004 | 0.013 | 0.016 | 0.594 |   | 1              | 0.000 | 0.000 | 0.000 | 0.129 |   | 1              | 0.000 | 0.012 | 0.000 | 0.000 |   | 1              | 0.118 | 0.016 | 0.001 | 0.000 |   | 1               | 0.001 | 0.003 | 0.001 | 0.062 |   |
| 2              |       | 0.001 | 0.003 | 0.112 |   | 2              |       | 0.000 | 0.000 | 0.066 |   | 2              |       | 0.014 | 0.000 | 0.000 |   | 2              |       | 0.000 | 0.000 | 0.000 |   | 2               |       | 0.011 | 0.000 | 0.043 |   |
| 3              |       |       | 0.006 | 0.230 |   | 3              |       |       | 0.000 | 0.775 |   | 3              |       |       | 0.014 | 0.000 |   | 3              |       |       | 0.000 | 0.000 |   | 3               |       |       | 0.010 | 0.764 |   |
| 4              |       |       |       | 0.006 |   | 4              |       |       |       | 0.026 |   | 4              |       |       |       | 0.000 |   | 4              |       |       |       | 0.000 |   | 4               |       |       |       | 0.036 |   |
| 5              |       |       |       |       |   | 5              |       |       |       |       |   | 5              |       |       |       |       |   | 5              |       |       |       |       |   | 5               |       |       |       |       |   |

| T <sub>1</sub> | 1     | 2     | 3     | 4     | 5 | T <sub>2</sub> | 1     | 2     | 3     | 4     | 5 | T <sub>3</sub> | 1     | 2     | 3     | 4     | 5 | T <sub>4</sub> | 1     | 2     | 3     | 4     | 5 | T <sub>5</sub> | 1     | 2     | 3     | 4     | 5 |
|----------------|-------|-------|-------|-------|---|----------------|-------|-------|-------|-------|---|----------------|-------|-------|-------|-------|---|----------------|-------|-------|-------|-------|---|----------------|-------|-------|-------|-------|---|
| 1              | 0.000 | 0.004 | 0.000 | 0.000 |   | 1              | 0.065 | 0.010 | 0.001 | 0.000 |   | 1              | 0.153 | 0.205 | 0.010 | 0.005 |   | 1              | 0.003 | 0.053 | 0.000 | 0.000 |   | 1              | 0.000 | 0.001 | 0.009 | 0.051 |   |
| 2              |       | 0.009 | 0.000 | 0.000 |   | 2              |       | 0.000 | 0.000 | 0.000 |   | 2              |       | 0.074 | 0.006 | 0.003 |   | 2              |       | 0.003 | 0.001 | 0.000 |   | 2              |       | 0.005 | 0.006 | 0.037 |   |
| 3              |       |       | 0.015 | 0.002 |   | 3              |       |       | 0.000 | 0.000 |   | 3              |       |       | 0.003 | 0.001 |   | 3              |       |       | 0.014 | 0.000 |   | 3              |       |       | 0.117 | 0.642 |   |
| 4              |       |       |       | 0.000 |   | 4              |       |       |       | 0.000 |   | 4              |       |       |       | 0.000 |   | 4              |       |       |       | 0.000 |   | 4              |       |       |       | 0.062 |   |
| 5              |       |       |       |       |   | 5              |       |       |       |       |   | 5              |       |       |       |       |   | 5              |       |       |       |       |   | 5              |       |       |       |       |   |

| T <sub>6</sub> | 1     | 2     | 3     | 4     | 5 | T <sub>7</sub> | 1     | 2     | 3     | 4     | 5 | T <sub>8</sub> | 1     | 2     | 3     | 4     | 5 | T <sub>9</sub> | 1     | 2     | 3     | 4     | 5 | T <sub>10</sub> | 1     | 2     | 3     | 4     | 5 |
|----------------|-------|-------|-------|-------|---|----------------|-------|-------|-------|-------|---|----------------|-------|-------|-------|-------|---|----------------|-------|-------|-------|-------|---|-----------------|-------|-------|-------|-------|---|
| 1              | 0.001 | 0.023 | 0.000 | 0.000 |   | 1              | 0.065 | 0.011 | 0.001 | 0.000 |   | 1              | 0.006 | 0.073 | 0.024 | 0.152 |   | 1              | 0.006 | 0.080 | 0.009 | 0.104 |   | 1               | 0.000 | 0.000 | 0.000 | 0.004 |   |
| 2              |       | 0.021 | 0.001 | 0.000 |   | 2              |       | 0.000 | 0.000 | 0.000 |   | 2              |       | 0.000 | 0.006 | 0.023 |   | 2              |       | 0.000 | 0.000 | 0.002 |   | 2               |       | 0.000 | 0.000 | 0.000 |   |
| 3              |       |       | 0.006 | 0.000 |   | 3              |       |       | 0.000 | 0.000 |   | 3              |       |       | 0.072 | 0.296 |   | 3              |       |       | 0.003 | 0.016 |   | 3               |       |       | 0.000 | 0.014 |   |
| 4              |       |       |       | 0.000 |   | 4              |       |       |       | 0.000 |   | 4              |       |       |       | 0.051 |   | 4              |       |       |       | 0.002 |   | 4               |       |       |       | 0.029 |   |
| 5              |       |       |       |       |   | 5              |       |       |       |       |   | 5              |       |       |       |       |   | 5              |       |       |       |       |   | 5               |       |       |       |       |   |

X<sub>2</sub>-NZ-D<sub>10</sub>

| S <sub>1</sub> | 1     | 2     | 3     | 4     | 5 | S <sub>2</sub> | 1     | 2     | 3     | 4     | 5 | S <sub>3</sub> | 1     | 2     | 3     | 4     | 5 | S <sub>4</sub> | 1     | 2     | 3     | 4     | 5 | S <sub>5</sub> | 1     | 2     | 3     | 4     | 5 |
|----------------|-------|-------|-------|-------|---|----------------|-------|-------|-------|-------|---|----------------|-------|-------|-------|-------|---|----------------|-------|-------|-------|-------|---|----------------|-------|-------|-------|-------|---|
| 1              | 0.002 | 0.021 | 0.002 | 0.001 |   | 1              | 0.068 | 0.008 | 0.000 | 0.001 |   | 1              | 0.000 | 0.003 | 0.004 | 0.067 |   | 1              | 0.077 | 0.462 | 0.035 | 0.026 |   | 1              | 0.000 | 0.000 | 0.000 | 0.100 |   |
| 2              |       | 0.028 | 0.002 | 0.001 |   | 2              |       | 0.000 | 0.000 | 0.000 |   | 2              |       | 0.001 | 0.002 | 0.046 |   | 2              |       | 0.175 | 0.014 | 0.010 |   | 2              |       | 0.000 | 0.000 | 0.059 |   |
| 3              |       |       | 0.047 | 0.024 |   | 3              |       |       | 0.000 | 0.000 |   | 3              |       |       | 0.040 | 0.751 |   | 3              |       |       | 0.007 | 0.005 |   | 3              |       |       | 0.000 | 0.804 |   |

|                |   |       |       |       |       |                |   |       |       |       |       |                |   |       |       |       |       |                |   |       |       |       |       |                 |   |       |       |       |       |
|----------------|---|-------|-------|-------|-------|----------------|---|-------|-------|-------|-------|----------------|---|-------|-------|-------|-------|----------------|---|-------|-------|-------|-------|-----------------|---|-------|-------|-------|-------|
| 4              |   |       |       | 0.001 | 4     |                |   |       |       | 0.000 | 4     |                |   |       | 0.033 | 4     |       |                |   | 0.000 | 4     |       |       |                 |   |       |       | 0.029 |       |
| 5              |   |       |       |       | 5     |                |   |       |       |       | 5     |                |   |       |       | 5     |       |                |   |       | 5     |       |       |                 |   |       |       |       |       |
| S <sub>6</sub> | 1 | 2     | 3     | 4     | 5     | S <sub>7</sub> | 1 | 2     | 3     | 4     | 5     | S <sub>8</sub> | 1 | 2     | 3     | 4     | 5     | S <sub>9</sub> | 1 | 2     | 3     | 4     | 5     | S <sub>10</sub> | 1 | 2     | 3     | 4     | 5     |
|                | 1 | 0.004 | 0.025 | 0.031 | 0.623 |                | 1 | 0.000 | 0.001 | 0.002 | 0.113 |                | 1 | 0.000 | 0.006 | 0.016 | 0.084 |                | 1 | 0.000 | 0.000 | 0.000 | 0.116 |                 | 1 | 0.000 | 0.000 | 0.000 | 0.721 |
|                | 2 |       | 0.004 | 0.006 | 0.123 |                | 2 |       | 0.000 | 0.001 | 0.060 |                | 2 |       | 0.003 | 0.007 | 0.037 |                | 2 |       | 0.000 | 0.000 | 0.062 |                 | 2 |       | 0.000 | 0.000 | 0.128 |
|                | 3 |       |       | 0.007 | 0.154 |                | 3 |       |       | 0.013 | 0.775 |                | 3 |       |       | 0.120 | 0.633 |                | 3 |       |       | 0.002 | 0.787 |                 | 3 |       |       | 0.000 | 0.145 |
|                | 4 |       |       |       | 0.006 |                | 4 |       |       |       | 0.026 |                | 4 |       |       |       | 0.025 |                | 4 |       |       |       | 0.027 |                 | 4 |       |       |       | 0.003 |
|                | 5 |       |       |       |       |                | 5 |       |       |       |       |                | 5 |       |       |       |       |                | 5 |       |       |       |       |                 | 5 |       |       |       |       |
| T <sub>1</sub> | 1 | 2     | 3     | 4     | 5     | T <sub>2</sub> | 1 | 2     | 3     | 4     | 5     | T <sub>3</sub> | 1 | 2     | 3     | 4     | 5     | T <sub>4</sub> | 1 | 2     | 3     | 4     | 5     | T <sub>5</sub>  | 1 | 2     | 3     | 4     | 5     |
|                | 1 | 0.000 | 0.004 | 0.000 | 0.000 |                | 1 | 0.066 | 0.009 | 0.001 | 0.001 |                | 1 | 0.061 | 0.164 | 0.004 | 0.004 |                | 1 | 0.038 | 0.144 | 0.002 | 0.000 |                 | 1 | 0.000 | 0.000 | 0.001 | 0.058 |
|                | 2 |       | 0.010 | 0.000 | 0.000 |                | 2 |       | 0.000 | 0.000 | 0.000 |                | 2 |       | 0.017 | 0.001 | 0.003 |                | 2 |       | 0.005 | 0.000 | 0.000 |                 | 2 |       | 0.005 | 0.005 | 0.041 |
|                | 3 |       |       | 0.017 | 0.002 |                | 3 |       |       | 0.000 | 0.000 |                | 3 |       |       | 0.001 | 0.006 |                | 3 |       |       | 0.000 | 0.000 |                 | 3 |       |       | 0.084 | 0.693 |
|                | 4 |       |       |       | 0.000 |                | 4 |       |       |       | 0.000 |                | 4 |       |       |       | 0.000 |                | 4 |       |       |       | 0.000 |                 | 4 |       |       |       | 0.057 |
|                | 5 |       |       |       |       |                | 5 |       |       |       |       |                | 5 |       |       |       |       |                | 5 |       |       |       |       |                 | 5 |       |       |       |       |
| T <sub>6</sub> | 1 | 2     | 3     | 4     | 5     | T <sub>7</sub> | 1 | 2     | 3     | 4     | 5     | T <sub>8</sub> | 1 | 2     | 3     | 4     | 5     | T <sub>9</sub> | 1 | 2     | 3     | 4     | 5     | T <sub>10</sub> | 1 | 2     | 3     | 4     | 5     |
|                | 1 | 0.001 | 0.025 | 0.000 | 0.000 |                | 1 | 0.000 | 0.000 | 0.000 | 0.099 |                | 1 | 0.000 | 0.000 | 0.000 | 0.000 |                | 1 | 0.063 | 0.011 | 0.000 | 0.000 |                 | 1 | 0.002 | 0.002 | 0.001 | 0.000 |
|                | 2 |       | 0.023 | 0.000 | 0.000 |                | 2 |       | 0.000 | 0.000 | 0.059 |                | 2 |       | 0.000 | 0.000 | 0.000 |                | 2 |       | 0.000 | 0.000 | 0.000 |                 | 2 |       | 0.000 | 0.000 | 0.000 |
|                | 3 |       |       | 0.004 | 0.000 |                | 3 |       |       | 0.001 | 0.796 |                | 3 |       |       | 0.000 | 0.003 |                | 3 |       |       | 0.000 | 0.000 |                 | 3 |       |       | 0.000 | 0.000 |
|                | 4 |       |       |       | 0.000 |                | 4 |       |       |       | 0.030 |                | 4 |       |       |       | 0.032 |                | 4 |       |       |       | 0.000 |                 | 4 |       |       |       | 0.000 |
|                | 5 |       |       |       |       |                | 5 |       |       |       |       |                | 5 |       |       |       |       |                | 5 |       |       |       |       |                 | 5 |       |       |       |       |

**SIIV:** The excitation energy ( $E_S$ ,  $E_T$ ) and transition dipole moments ( $\lambda$ ) of the  $S_1$ - $S_{10}$  and  $T_1$ - $T_{10}$  of the  $X_1$ -NZ- $D_{1-10}$  and  $X_2$ -NZ- $D_{1-10}$

|    | $X_1$ -B <sub>2</sub> -D <sub>1</sub> |                    |               |                    | $X_1$ -B <sub>2</sub> -D <sub>2</sub> |                    |               |                    | $X_1$ -B <sub>2</sub> -D <sub>3</sub> |                    |               |                    | $X_1$ -B <sub>2</sub> -D <sub>4</sub> |                    |               |                    | $X_1$ -B <sub>2</sub> -D <sub>5</sub>  |                    |               |                    |
|----|---------------------------------------|--------------------|---------------|--------------------|---------------------------------------|--------------------|---------------|--------------------|---------------------------------------|--------------------|---------------|--------------------|---------------------------------------|--------------------|---------------|--------------------|----------------------------------------|--------------------|---------------|--------------------|
|    | $E_S$<br>(eV)                         | $\mu_S$<br>(Debye) | $E_T$<br>(eV) | $\mu_T$<br>(Debye) | $E_S$<br>(eV)                          | $\mu_S$<br>(Debye) | $E_T$<br>(eV) | $\mu_T$<br>(Debye) |
| 1  | <u>2.34</u>                           | <u>36.39</u>       | 1.36          | 4.29               | <u>2.51</u>                           | <u>39.29</u>       | 1.37          | 3.95               | <u>2.45</u>                           | <u>17.63</u>       | 1.31          | 6.30               | <u>2.64</u>                           | <u>6.55</u>        | 1.36          | 4.37               | <u>2.62</u>                            | <u>37.34</u>       | 1.35          | 4.31               |
| 2  | <u>2.71</u>                           | 4.78               | <u>2.34</u>   | <u>36.38</u>       | <u>2.72</u>                           | <u>7.12</u>        | <u>2.51</u>   | <u>39.38</u>       | <u>2.85</u>                           | <u>28.94</u>       | <u>2.66</u>   | <u>31.60</u>       | <u>2.71</u>                           | <u>32.28</u>       | <u>2.64</u>   | <u>33.34</u>       | <u>2.74</u>                            | 5.12               | <u>2.73</u>   | <u>37.47</u>       |
| 3  | <u>2.75</u>                           | <u>26.32</u>       | <u>2.75</u>   | <u>31.04</u>       | <u>2.74</u>                           | <u>26.83</u>       | <u>2.73</u>   | <u>33.43</u>       | <u>2.98</u>                           | <u>22.41</u>       | <u>2.85</u>   | <u>30.10</u>       | <u>2.75</u>                           | <u>37.96</u>       | <u>2.75</u>   | <u>40.90</u>       | <u>2.89</u>                            | <u>30.97</u>       | <u>2.79</u>   | <u>30.95</u>       |
| 4  | 3.61                                  | 5.10               | 2.99          | 2.47               | <u>3.22</u>                           | <u>43.79</u>       | 3.06          | 2.82               | <u>3.57</u>                           | <u>45.90</u>       | 3.08          | 4.86               | <u>3.68</u>                           | <u>33.65</u>       | 3.06          | 3.26               | <u>3.21</u>                            | <u>41.58</u>       | 3.06          | 3.57               |
| 5  | <u>3.75</u>                           | <u>18.50</u>       | 3.06          | 3.39               | <u>3.90</u>                           | <u>33.25</u>       | 3.22          | 3.12               | <u>3.87</u>                           | <u>34.35</u>       | 3.24          | 5.58               | 3.85                                  | 4.74               | 3.20          | 2.65               | 3.76                                   | 6.09               | <u>3.20</u>   | <u>5.20</u>        |
| 6  | 3.99                                  | 3.61               | 3.24          | 3.44               | 3.95                                  | 2.66               | 3.24          | 2.28               | 3.94                                  | 3.14               | 3.25          | 4.80               | <u>3.99</u>                           | <u>7.99</u>        | 3.24          | 3.38               | 3.97                                   | 2.89               | 3.23          | 3.92               |
| 7  | <u>4.01</u>                           | <u>10.20</u>       | 3.32          | 3.49               | <u>3.98</u>                           | <u>9.46</u>        | 3.27          | 1.66               | 3.99                                  | 4.32               | 3.30          | 6.00               | <u>4.00</u>                           | <u>9.16</u>        | 3.32          | 2.37               | <u>3.98</u>                            | <u>15.10</u>       | 3.25          | 3.66               |
| 8  | 4.04                                  | 2.93               | 3.53          | 3.28               | <u>4.00</u>                           | <u>7.72</u>        | 3.32          | 2.96               | 4.01                                  | 6.59               | <u>3.37</u>   | <u>8.88</u>        | <u>4.00</u>                           | <u>2.60</u>        | 3.51          | 2.94               | <u>4.01</u>                            | <u>26.85</u>       | <u>3.32</u>   | <u>22.67</u>       |
| 9  | <u>4.10</u>                           | <u>35.60</u>       | 3.64          | 3.12               | 4.04                                  | 2.20               | 3.50          | 1.66               | <u>4.05</u>                           | <u>9.68</u>        | <u>3.57</u>   | <u>40.32</u>       | <u>4.04</u>                           | <u>33.27</u>       | 3.68          | 2.96               | 4.04                                   | 3.26               | 3.48          | 2.44               |
| 10 | <u>4.11</u>                           | <u>11.90</u>       | 3.70          | 2.99               | <u>4.06</u>                           | <u>29.33</u>       | 3.57          | 0.88               | 4.07                                  | 4.26               | <u>3.62</u>   | <u>25.82</u>       | <u>4.13</u>                           | 4.70               | 3.71          | 1.67               | 4.10                                   | <u>30.24</u>       | 3.59          | 4.19               |
|    | $X_1$ -B <sub>2</sub> -D <sub>6</sub> |                    |               |                    | $X_1$ -B <sub>2</sub> -D <sub>7</sub> |                    |               |                    | $X_1$ -B <sub>2</sub> -D <sub>8</sub> |                    |               |                    | $X_1$ -B <sub>2</sub> -D <sub>9</sub> |                    |               |                    | $X_1$ -B <sub>2</sub> -D <sub>10</sub> |                    |               |                    |
|    | $E_S$<br>(eV)                         | $\mu_S$<br>(Debye) | $E_T$<br>(eV) | $\mu_T$<br>(Debye) | $E_S$<br>(eV)                          | $\mu_S$<br>(Debye) | $E_T$<br>(eV) | $\mu_T$<br>(Debye) |
| 1  | <u>2.65</u>                           | <u>11.40</u>       | 1.35          | 3.91               | <u>2.64</u>                           | <u>9.25</u>        | 1.35          | 5.26               | 2.64                                  | <u>8.14</u>        | 1.34          | 5.46               | <u>2.68</u>                           | <u>12.34</u>       | 1.36          | 5.21               | <u>2.66</u>                            | <u>27.02</u>       | 1.36          | 4.69               |
| 2  | <u>2.74</u>                           | <u>31.82</u>       | <u>2.73</u>   | <u>33.75</u>       | <u>2.77</u>                           | <u>30.35</u>       | <u>2.77</u>   | <u>30.49</u>       | <u>2.81</u>                           | <u>30.35</u>       | <u>2.81</u>   | <u>30.38</u>       | <u>2.72</u>                           | <u>22.67</u>       | <u>2.70</u>   | <u>34.54</u>       | <u>2.71</u>                            | <u>11.82</u>       | <u>2.67</u>   | <u>36.73</u>       |
| 3  | <u>2.97</u>                           | <u>30.80</u>       | <u>2.90</u>   | <u>40.86</u>       | <u>3.13</u>                           | <u>31.36</u>       | <u>2.99</u>   | <u>32.50</u>       | <u>3.29</u>                           | <u>40.21</u>       | <u>3.06</u>   | <u>11.67</u>       | <u>3.34</u>                           | <u>38.94</u>       | 3.06          | 4.28               | <u>3.33</u>                            | <u>39.50</u>       | 3.06          | 3.85               |
| 4  | <u>3.72</u>                           | <u>46.95</u>       | 3.06          | 2.77               | <u>3.73</u>                           | <u>40.45</u>       | 3.07          | 4.88               | 3.99                                  | 3.68               | <u>3.08</u>   | <u>18.80</u>       | <u>3.81</u>                           | <u>38.43</u>       | 3.24          | 3.27               | <u>3.60</u>                            | <u>47.37</u>       | 3.25          | 2.42               |
| 5  | 3.93                                  | 3.08               | <u>3.24</u>   | <u>46.02</u>       | 3.99                                  | 1.36               | 3.24          | 4.64               | <u>4.03</u>                           | 4.54               | 3.24          | 4.94               | <u>3.98</u>                           | <u>15.82</u>       | <u>3.27</u>   | <u>33.31</u>       | <u>3.96</u>                            | <u>17.67</u>       | <u>3.28</u>   | <u>34.93</u>       |
| 6  | <u>3.98</u>                           | <u>29.51</u>       | 3.32          | 2.11               | <u>4.01</u>                           | <u>10.91</u>       | 3.32          | 4.52               | 4.04                                  | <u>14.00</u>       | 3.32          | 5.09               | 4.00                                  | 5.11               | 3.32          | 4.17               | <u>3.99</u>                            | <u>32.49</u>       | 3.32          | 3.42               |
| 7  | <u>4.01</u>                           | <u>9.16</u>        | 3.38          | 2.25               | 4.04                                  | 3.96               | 3.34          | 2.78               | <u>4.11</u>                           | <u>10.56</u>       | <u>3.43</u>   | <u>20.80</u>       | <u>4.03</u>                           | <u>54.61</u>       | 3.62          | 2.61               | 4.00                                   | 6.20               | 3.51          | 3.44               |
| 8  | 4.04                                  | 8.04               | 3.54          | 2.94               | 4.09                                  | 2.53               | 3.52          | 5.71               | <u>4.14</u>                           | <u>16.78</u>       | 3.67          | 1.85               | 4.04                                  | 3.70               | <u>3.66</u>   | <u>9.94</u>        | <u>4.03</u>                            | <u>53.23</u>       | <u>3.59</u>   | <u>42.67</u>       |
| 9  | 4.14                                  | 2.11               | 3.56          | 2.96               | 4.19                                  | 3.78               | <u>3.74</u>   | <u>25.39</u>       | <u>4.33</u>                           | <u>16.02</u>       | <u>3.73</u>   | <u>10.30</u>       | 4.19                                  | 5.90               | <u>3.67</u>   | <u>12.35</u>       | 4.04                                   | 3.36               | 3.63          | 2.92               |
| 10 | 4.21                                  | 5.34               | 3.60          | 1.67               | 4.39                                  | 3.96               | <u>3.75</u>   | <u>18.73</u>       | 4.40                                  | 3.26               | 3.85          | 5.26               | <u>4.23</u>                           | <u>29.52</u>       | 3.68          | 3.19               | <u>4.05</u>                            | <u>55.24</u>       | <u>3.70</u>   | 3.02               |

$E_S$  and the  $E_T$  are the energy of the singlet and triplet excited states,  $\mu_S$  and the  $\mu_T$  are the dipole moment of the singlet and triplet excited states.



|    | X <sub>2</sub> -B <sub>2</sub> -D <sub>1</sub> |                           |                        |                           | X <sub>2</sub> -B <sub>2</sub> -D <sub>2</sub> |                           |                        |                           | X <sub>2</sub> -B <sub>2</sub> -D <sub>3</sub> |                           |                        |                           | X <sub>2</sub> -B <sub>2</sub> -D <sub>4</sub> |                           |                        |                           | X <sub>2</sub> -B <sub>2</sub> -D <sub>5</sub>  |                           |                        |                           |
|----|------------------------------------------------|---------------------------|------------------------|---------------------------|------------------------------------------------|---------------------------|------------------------|---------------------------|------------------------------------------------|---------------------------|------------------------|---------------------------|------------------------------------------------|---------------------------|------------------------|---------------------------|-------------------------------------------------|---------------------------|------------------------|---------------------------|
|    | E <sub>S</sub><br>(eV)                         | μ <sub>S</sub><br>(Debye) | E <sub>T</sub><br>(eV) | μ <sub>T</sub><br>(Debye) | E <sub>S</sub><br>(eV)                         | μ <sub>S</sub><br>(Debye) | E <sub>T</sub><br>(eV) | μ <sub>T</sub><br>(Debye) | E <sub>S</sub><br>(eV)                         | μ <sub>S</sub><br>(Debye) | E <sub>T</sub><br>(eV) | μ <sub>T</sub><br>(Debye) | E <sub>S</sub><br>(eV)                         | μ <sub>S</sub><br>(Debye) | E <sub>T</sub><br>(eV) | μ <sub>T</sub><br>(Debye) | E <sub>S</sub><br>(eV)                          | μ <sub>S</sub><br>(Debye) | E <sub>T</sub><br>(eV) | μ <sub>T</sub><br>(Debye) |
| 1  | <u>2.27</u>                                    | <u>40.35</u>              | 1.35                   | 4.52                      | <u>2.43</u>                                    | <u>43.70</u>              | 1.36                   | <u>43.76</u>              | <u>2.37</u>                                    | <u>21.29</u>              | 1.29                   | 7.05                      | <u>2.56</u>                                    | <u>41.28</u>              | 1.35                   | 4.58                      | <u>2.56</u>                                     | <u>17.55</u>              | 1.34                   | 4.02                      |
| 2  | 2.67                                           | 6.14                      | <u>2.27</u>            | <u>40.36</u>              | 2.67                                           | 5.43                      | <u>2.43</u>            | 2.23                      | <u>2.91</u>                                    | <u>28.62</u>              | <u>2.59</u>            | <u>36.00</u>              | 2.66                                           | 6.33                      | <u>2.56</u>            | <u>41.39</u>              | <u>2.81</u>                                     | <u>33.10</u>              | <u>2.70</u>            | <u>45.52</u>              |
| 3  | <u>2.88</u>                                    | <u>68.04</u>              | 2.84                   | 1.35                      | <u>3.01</u>                                    | <u>71.85</u>              | 2.83                   | <u>68.88</u>              | 3.03                                           | 2.97                      | 2.84                   | 2.89                      | 3.03                                           | 1.30                      | 2.84                   | 1.21                      | 3.03                                            | 2.16                      | 2.84                   | 2.27                      |
| 4  | 3.03                                           | 1.37                      | <u>2.88</u>            | <u>67.87</u>              | 3.03                                           | 2.13                      | <u>3.01</u>            | <u>16.16</u>              | <u>3.08</u>                                    | <u>50.09</u>              | <u>2.86</u>            | <u>31.03</u>              | <u>3.19</u>                                    | <u>69.33</u>              | <u>3.02</u>            | <u>18.17</u>              | <u>3.11</u>                                     | <u>52.55</u>              | <u>3.01</u>            | <u>19.97</u>              |
| 5  | <u>3.44</u>                                    | <u>28.01</u>              | 3.00                   | 2.78                      | <u>3.13</u>                                    | <u>49.45</u>              | <u>3.03</u>            | <u>5.40</u>               | <u>3.46</u>                                    | <u>54.02</u>              | 3.06                   | 5.83                      | <u>3.43</u>                                    | <u>28.86</u>              | 3.05                   | 4.72                      | <u>3.24</u>                                     | <u>67.45</u>              | 3.05                   | 3.06                      |
| 6  | 3.61                                           | 6.16                      | <u>3.02</u>            | <u>17.29</u>              | <u>3.46</u>                                    | <u>27.13</u>              | <u>3.05</u>            | <u>49.39</u>              | <u>3.49</u>                                    | <u>52.31</u>              | 3.25                   | 7.59                      | <u>3.60</u>                                    | <u>46.03</u>              | <u>3.19</u>            | <u>69.20</u>              | <u>3.47</u>                                     | <u>36.32</u>              | <u>3.11</u>            | <u>51.88</u>              |
| 7  | 3.74                                           | <u>19.74</u>              | 3.05                   | 4.56                      | <u>3.62</u>                                    | <u>74.61</u>              | 3.13                   | 1.87                      | <u>3.80</u>                                    | <u>39.07</u>              | <u>3.27</u>            | <u>45.09</u>              | 3.85                                           | 6.35                      | 3.20                   | 5.51                      | <u>3.61</u>                                     | <u>78.37</u>              | 3.23                   | 2.26                      |
| 8  | <u>3.87</u>                                    | <u>72.58</u>              | 3.33                   | 3.92                      | <u>3.83</u>                                    | <u>40.59</u>              | 3.27                   | 3.24                      | <u>3.90</u>                                    | <u>71.47</u>              | <u>3.32</u>            | <u>15.16</u>              | <u>3.96</u>                                    | <u>35.26</u>              | 3.33                   | 4.17                      | 3.77                                            | 3.34                      | <u>3.28</u>            | <u>70.30</u>              |
| 9  | <u>4.03</u>                                    | <u>40.70</u>              | 3.52                   | 1.59                      | 3.95                                           | 3.51                      | 3.33                   | 1.90                      | 3.95                                           | 7.53                      | <u>3.38</u>            | <u>13.22</u>              | 4.03                                           | 4.19                      | 3.52                   | 1.75                      | <u>3.91</u>                                     | <u>33.86</u>              | 3.33                   | 3.61                      |
| 10 | 4.03                                           | 3.84                      | 3.53                   | 3.80                      | <u>3.97</u>                                    | <u>71.12</u>              | 3.50                   |                           | 4.00                                           | 7.15                      | <u>3.47</u>            | <u>50.60</u>              | 4.07                                           | 2.81                      | 3.52                   | 3.02                      | 4.02                                            | 2.60                      | 3.48                   | 3.79                      |
|    | X <sub>2</sub> -B <sub>2</sub> -D <sub>6</sub> |                           |                        |                           | X <sub>2</sub> -B <sub>2</sub> -D <sub>7</sub> |                           |                        |                           | X <sub>2</sub> -B <sub>2</sub> -D <sub>8</sub> |                           |                        |                           | X <sub>2</sub> -B <sub>2</sub> -D <sub>9</sub> |                           |                        |                           | X <sub>2</sub> -B <sub>2</sub> -D <sub>10</sub> |                           |                        |                           |
|    | E <sub>S</sub><br>(eV)                         | μ <sub>S</sub><br>(Debye) | E <sub>T</sub><br>(eV) | μ <sub>T</sub><br>(Debye) | E <sub>S</sub><br>(eV)                         | μ <sub>S</sub><br>(Debye) | E <sub>T</sub><br>(eV) | μ <sub>T</sub><br>(Debye) | E <sub>S</sub><br>(eV)                         | μ <sub>S</sub><br>(Debye) | E <sub>T</sub><br>(eV) | μ <sub>T</sub><br>(Debye) | E <sub>S</sub><br>(eV)                         | μ <sub>S</sub><br>(Debye) | E <sub>T</sub><br>(eV) | μ <sub>T</sub><br>(Debye) | E <sub>S</sub><br>(eV)                          | μ <sub>S</sub><br>(Debye) | E <sub>T</sub><br>(eV) | μ <sub>T</sub><br>(Debye) |
| 1  | <u>2.60</u>                                    | <u>10.43</u>              | 1.34                   | 4.50                      | <u>2.58</u>                                    | <u>11.84</u>              | 1.34                   | 5.60                      | 2.59                                           | <u>10.55</u>              | 1.33                   | 5.89                      | 2.64                                           | 6.31                      | 1.35                   | 5.24                      | 2.65                                            | 4.87                      | 1.35                   | 4.65                      |
| 2  | <u>2.89</u>                                    | <u>41.50</u>              | <u>2.82</u>            | <u>45.76</u>              | 3.03                                           | 2.00                      | 2.84                   | 1.89                      | 3.03                                           | 2.30                      | 2.84                   | 2.22                      | 3.03                                           | 4.22                      | 2.83                   | 4.33                      | 3.02                                            | 4.97                      | 2.83                   | 5.15                      |
| 3  | 3.03                                           | 2.37                      | 2.84                   | 2.45                      | <u>3.06</u>                                    | <u>34.42</u>              | <u>2.91</u>            | <u>35.74</u>              | <u>3.21</u>                                    | <u>45.50</u>              | <u>2.95</u>            | <u>25.23</u>              | <u>3.27</u>                                    | <u>43.71</u>              | <u>3.03</u>            | <u>14.34</u>              | <u>3.25</u>                                     | <u>44.16</u>              | <u>3.04</u>            | <u>7.08</u>               |
| 4  | <u>3.33</u>                                    | <u>56.81</u>              | <u>3.01</u>            | <u>18.19</u>              | <u>3.35</u>                                    | <u>37.20</u>              | <u>2.99</u>            | <u>22.63</u>              | <u>3.32</u>                                    | <u>35.10</u>              | <u>3.02</u>            | <u>29.90</u>              | 3.45                                           | <u>27.69</u>              | 3.05                   | 4.60                      | <u>3.48</u>                                     | <u>25.86</u>              | 3.06                   | 5.91                      |
| 5  | <u>3.48</u>                                    | <u>45.92</u>              | 3.05                   | 3.63                      | <u>3.65</u>                                    | <u>45.08</u>              | 3.06                   | 5.05                      | <u>3.74</u>                                    | <u>73.66</u>              | 3.06                   | 5.62                      | <u>3.71</u>                                    | <u>46.33</u>              | <u>3.20</u>            | <u>38.43</u>              | <u>3.50</u>                                     | <u>52.97</u>              | <u>3.20</u>            | <u>40.69</u>              |
| 6  | <u>3.65</u>                                    | <u>37.62</u>              | 3.33                   | 3.86                      | <u>3.71</u>                                    | <u>61.83</u>              | 3.33                   | 5.06                      | 4.02                                           | 5.60                      | 3.32                   | 6.09                      | <u>3.85</u>                                    | <u>70.57</u>              | 3.33                   | 4.33                      | <u>3.81</u>                                     | <u>70.16</u>              | 3.33                   | 3.67                      |
| 7  | 3.92                                           | 5.04                      | <u>3.38</u>            | <u>69.03</u>              | 4.03                                           | 4.98                      | 3.34                   | 3.13                      | 4.07                                           | 3.28                      | <u>3.39</u>            | <u>22.54</u>              | <u>3.93</u>                                    | <u>60.89</u>              | 3.51                   | 3.86                      | <u>3.93</u>                                     | <u>57.44</u>              | <u>3.50</u>            | <u>52.21</u>              |
| 8  | 4.03                                           | 3.13                      | 3.38                   | 2.77                      | 4.07                                           | 2.88                      | 3.51                   | 2.53                      | <u>4.10</u>                                    | <u>15.60</u>              | 3.52                   | 2.83                      | 4.03                                           | 3.73                      | <u>3.60</u>            | <u>32.99</u>              | <u>3.94</u>                                     | <u>42.24</u>              | 3.51                   | 4.40                      |
| 9  | <u>4.07</u>                                    | <u>40.89</u>              | <u>3.51</u>            | <u>31.15</u>              | 4.09                                           | 2.93                      | <u>3.52</u>            | <u>9.11</u>               | <u>4.12</u>                                    | <u>16.71</u>              | <u>3.61</u>            | <u>10.77</u>              | 4.07                                           | 3.68                      | 3.61                   | 4.05                      | <u>3.95</u>                                     | <u>60.53</u>              | 3.51                   | 3.25                      |
| 10 | 4.07                                           | 2.01                      | 3.52                   | 1.92                      | 4.16                                           | 4.73                      | <u>3.59</u>            | <u>51.57</u>              | <u>4.26</u>                                    | <u>14.79</u>              | <u>3.62</u>            | <u>39.89</u>              | 4.14                                           | <u>38.78</u>              | 3.62                   | 2.30                      | <u>4.01</u>                                     | <u>78.67</u>              | 3.61                   | 2.96                      |

E<sub>S</sub> and the E<sub>T</sub> are the energy of the singlet and triplet excited excited states, μ<sub>S</sub> and the μ<sub>T</sub> are the dipole moment of the the singlet and triplet excited excited states.

**SV:** The SOC between the excited states of the  $X_1$ -NZ- $D_{1-10}$  and  $X_2$ -NZ- $D_{1-10}$

| $X_1$ -NZ- $D_n$               |                |                |                |                |                |                |                |                |                |                 |
|--------------------------------|----------------|----------------|----------------|----------------|----------------|----------------|----------------|----------------|----------------|-----------------|
|                                | D <sub>1</sub> | D <sub>2</sub> | D <sub>3</sub> | D <sub>4</sub> | D <sub>5</sub> | D <sub>6</sub> | D <sub>7</sub> | D <sub>8</sub> | D <sub>9</sub> | D <sub>10</sub> |
| S <sub>1</sub> -T <sub>1</sub> | 0.27           | 0.05           | 0.14           | 0.11           | 0.09           | 0.09           | 0.08           | 0.13           | 0.13           | 0.14            |
| S <sub>1</sub> -T <sub>2</sub> | 0.01           | <b>0.68</b>    | 0.47           | 0.01           | 0.06           | 0.02           | 0.01           | 0.33           | 0.03           | 0.00            |
| S <sub>1</sub> -T <sub>3</sub> | 0.28           | 0.01           | 0.02           | 0.45           | 0.04           | 0.11           | 0.11           | 0.01           | 0.40           | 0.40            |
| S <sub>2</sub> -T <sub>1</sub> | 0.11           | 0.26           | 0.31           | 0.28           | 0.28           | 0.27           | 0.26           | 0.27           | 0.26           | 0.26            |
| S <sub>2</sub> -T <sub>2</sub> | 0.44           | 0.06           | 0.07           | 0.00           | 0.26           | 0.26           | 0.24           | 0.01           | 0.26           | 0.27            |
| S <sub>2</sub> -T <sub>3</sub> | 0.02           | 0.22           | 0.26           | 0.01           | 0.01           | 0.08           | 0.08           | 0.24           | 0.06           | 0.06            |
| S <sub>3</sub> -T <sub>1</sub> | 0.26           | 0.02           | 0.13           | 0.26           | 0.21           | 0.20           | 0.24           | 0.13           | 0.15           | 0.14            |
| S <sub>3</sub> -T <sub>2</sub> | 0.03           | 0.18           | 0.29           | 0.23           | 0.02           | 0.00           | 0.01           | 0.27           | 0.00           | 0.01            |
| S <sub>3</sub> -T <sub>3</sub> | 0.00           | 0.00           | 0.08           | 0.00           | 0.12           | 0.12           | 0.20           | 0.00           | 0.08           | 0.08            |
| S <sub>3</sub> -T <sub>4</sub> | 0.26           | 0.01           | 0.12           | 0.00           | 0.13           | 0.11           | 0.32           | 0.31           | 0.15           | 0.10            |
| S <sub>3</sub> -T <sub>5</sub> | 0.07           | 0.00           | 0.27           | 0.08           | 0.13           | 0.14           | <b>1.26</b>    | <b>1.99</b>    | <b>1.61</b>    | <b>1.30</b>     |
| S <sub>4</sub> -T <sub>2</sub> | <b>1.02</b>    | 0.09           | <b>0.95</b>    | 0.00           | 0.00           | 0.00           | 0.00           | 0.02           | 0.00           | 0.00            |
| S <sub>4</sub> -T <sub>3</sub> | 0.19           | 0.05           | 0.00           | 0.38           | 0.08           | 0.17           | 0.04           | 0.02           | 0.06           | 0.00            |
| S <sub>4</sub> -T <sub>4</sub> | 0.00           | 0.02           | 0.04           | 0.11           | 0.02           | 0.07           | 0.08           | 0.01           | 0.16           | 0.01            |
| S <sub>4</sub> -T <sub>5</sub> | 0.01           | <b>0.67</b>    | 0.13           | 0.06           | 0.02           | 0.25           | 0.44           | 0.02           | <b>4.31</b>    | 0.09            |
| S <sub>5</sub> -T <sub>3</sub> | <b>0.88</b>    | 0.01           | 0.04           | <b>0.58</b>    | <b>1.60</b>    | 0.06           | 0.01           | 0.01           | <b>0.99</b>    | <b>1.07</b>     |
| S <sub>5</sub> -T <sub>4</sub> | 0.00           | 0.46           | 0.01           | 1.10           | 0.01           | 0.02           | <b>0.88</b>    | <b>0.59</b>    | 0.02           | 0.01            |
| S <sub>5</sub> -T <sub>5</sub> | 0.07           | 0.07           | 0.02           | 0.02           | 0.00           | <b>1.60</b>    | 0.20           | <b>0.85</b>    | 0.06           | 0.05            |
| S <sub>5</sub> -T <sub>6</sub> | 0.00           | 0.41           | 0.32           | 0.02           | 0.03           | 0.39           | 0.00           | 0.39           | 0.00           | 0.00            |
| S <sub>5</sub> -T <sub>7</sub> | 0.12           | <b>0.82</b>    | <b>0.88</b>    | 0.12           | 0.07           | 0.42           | 0.09           | 0.11           | 0.00           | 0.00            |
| $X_2$ -NZ- $D_n$               |                |                |                |                |                |                |                |                |                |                 |
|                                | D <sub>1</sub> | D <sub>2</sub> | D <sub>3</sub> | D <sub>4</sub> | D <sub>5</sub> | D <sub>6</sub> | D <sub>7</sub> | D <sub>8</sub> | D <sub>9</sub> | D <sub>10</sub> |
| S <sub>1</sub> -T <sub>1</sub> | 0.26           | 0.03           | 0.11           | 0.09           | 0.08           | 0.07           | 0.05           | 0.05           | 0.07           | 0.10            |
| S <sub>1</sub> -T <sub>2</sub> | 0.02           | 0.49           | <b>0.52</b>    | 0.43           | <b>0.71</b>    | <b>0.68</b>    | <b>0.68</b>    | 0.43           | <b>0.68</b>    | <b>0.66</b>     |
| S <sub>1</sub> -T <sub>3</sub> | 0.29           | 0.34           | 0.48           | <b>0.68</b>    | 0.05           | 0.06           | 0.06           | <b>0.62</b>    | 0.06           | 0.06            |
| S <sub>2</sub> -T <sub>1</sub> | 0.05           | 0.02           | 0.21           | 0.28           | 0.22           | 0.03           | 0.03           | 0.02           | 0.03           | 0.03            |
| S <sub>2</sub> -T <sub>2</sub> | 0.42           | 0.12           | 0.40           | 0.03           | 0.22           | 0.19           | 0.20           | 0.09           | 0.18           | 0.19            |
| S <sub>2</sub> -T <sub>3</sub> | 0.01           | 0.17           | 0.20           | 0.06           | 0.02           | 0.00           | 0.01           | 0.16           | 0.00           | 0.01            |
| S <sub>3</sub> -T <sub>1</sub> | 0.02           | 0.03           | 0.03           | 0.02           | 0.02           | 0.19           | 0.25           | 0.17           | 0.11           | 0.11            |
| S <sub>3</sub> -T <sub>2</sub> | 0.00           | 0.13           | 0.05           | 0.01           | 0.18           | 0.13           | 0.15           | 0.27           | 0.07           | 0.08            |
| S <sub>3</sub> -T <sub>3</sub> | 0.00           | 0.07           | 0.20           | 0.18           | 0.01           | 0.01           | 0.01           | 0.06           | 0.01           | 0.00            |
| S <sub>3</sub> -T <sub>4</sub> | 0.19           | 0.01           | 0.01           | 0.00           | 0.03           | 0.18           | 0.28           | 0.02           | 0.12           | 0.08            |
| S <sub>3</sub> -T <sub>5</sub> | 0.01           | 0.12           | 0.00           | 0.00           | 0.02           | 0.18           | <b>1.14</b>    | 0.36           | <b>1.40</b>    | <b>1.11</b>     |
| S <sub>4</sub> -T <sub>2</sub> | <b>0.67</b>    | 0.10           | 0.30           | <b>0.66</b>    | 0.07           | 0.09           | 0.09           | 0.13           | 0.17           | 0.20            |
| S <sub>4</sub> -T <sub>3</sub> | 0.08           | <b>0.55</b>    | 0.08           | 0.14           | 0.00           | 0.39           | 0.40           | 0.16           | 0.46           | 0.49            |
| S <sub>4</sub> -T <sub>4</sub> | 0.11           | 0.04           | 0.28           | 0.03           | 0.37           | 0.39           | 0.38           | 0.36           | 0.45           | 0.46            |
| S <sub>4</sub> -T <sub>5</sub> | 0.01           | 0.19           | 0.03           | 0.03           | 0.28           | 0.13           | <b>1.08</b>    | 0.34           | <b>0.97</b>    | <b>0.95</b>     |
| S <sub>5</sub> -T <sub>3</sub> | 0.01           | 0.18           | 0.19           | 0.15           | 0.29           | 0.20           | 0.00           | <b>3.74</b>    | 0.01           | 0.00            |
| S <sub>5</sub> -T <sub>4</sub> | 0.16           | <b>0.52</b>    | 0.03           | 0.44           | 0.35           | 0.15           | 0.02           | <b>3.68</b>    | 0.19           | 0.01            |
| S <sub>5</sub> -T <sub>5</sub> | 0.45           | 0.29           | 0.04           | 0.01           | 0.21           | 0.24           | 0.37           | <b>1.32</b>    | <b>3.53</b>    | 0.09            |
| S <sub>5</sub> -T <sub>6</sub> | 0.39           | 0.35           | 0.12           | 0.39           | 0.36           | <b>1.26</b>    | 0.11           | <b>0.66</b>    | 0.07           | 0.08            |
| S <sub>5</sub> -T <sub>7</sub> | <b>0.86</b>    | 0.14           | 0.48           | <b>0.88</b>    | <b>0.94</b>    | 0.42           | <b>0.52</b>    | <b>2.41</b>    | 0.01           | 0.01            |
